# Supplementary material for: A Systematic Review Demonstrates How Surrogate Populations Help Inform Conservation and Management of an Endangered Species—The Case of Cook Inlet, Alaska Belugas
Source: Frontiers journal article supplement (doi:10.3389/fmars.2022.804218), 2022-03-03

**Supplementary Figure 1A.** The Cook Inlet beluga population was listed as endangered under the Endangered Species Act in 2008 (red arrow). The asterisk represents a year during which a collection of journal articles was published in a special volume of the journal *Marine Fisheries Review*.

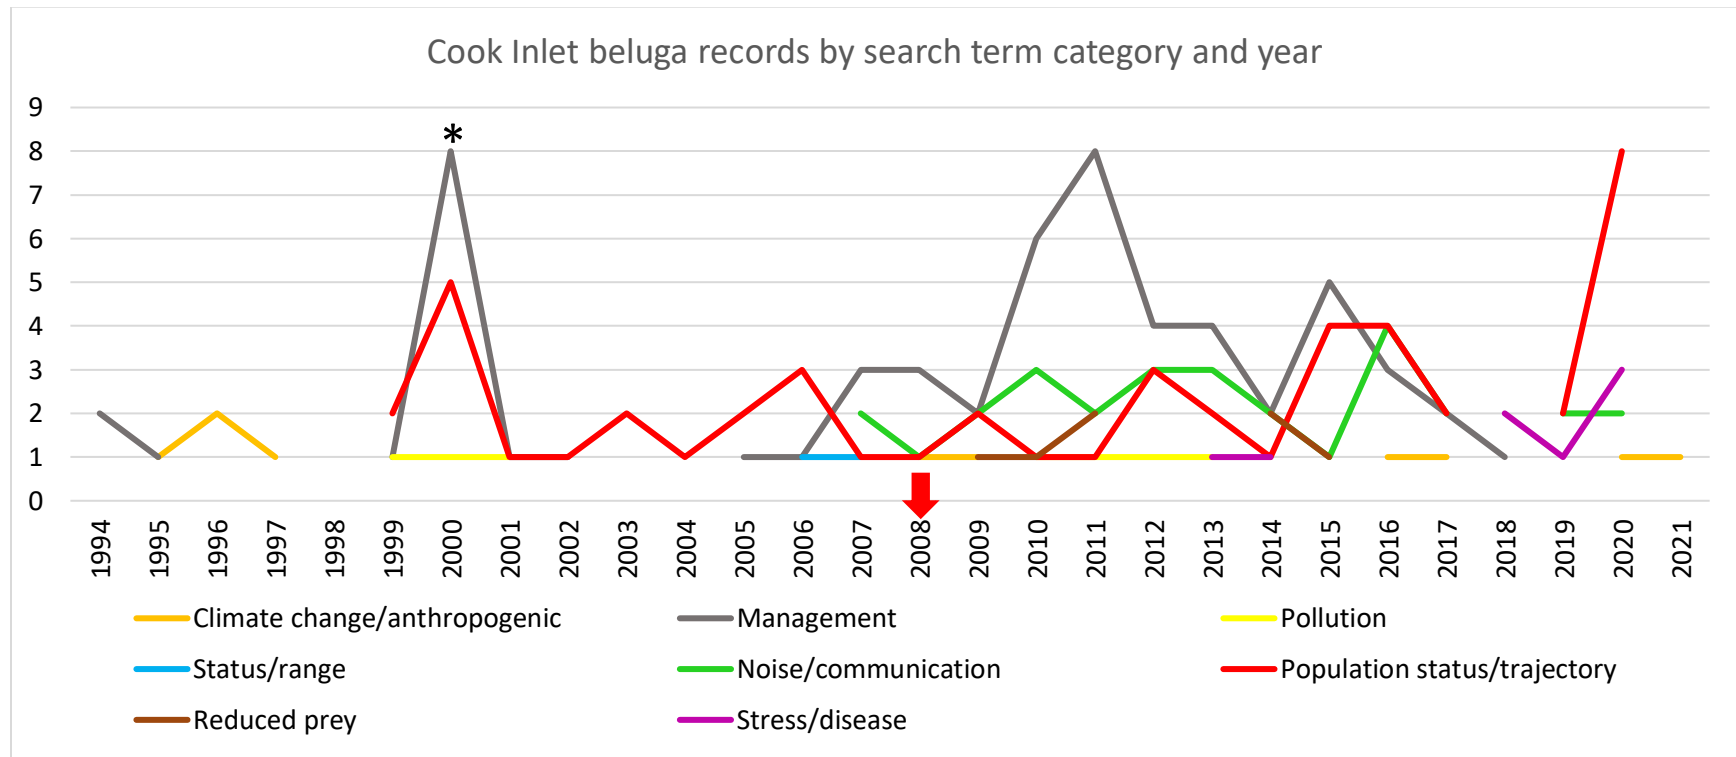



**Supplementary Figure 1C.** - Of the two sub-species of Hector's dolphin, the Māui dolphin sub-species, exclusive to the North Island, was designated as Threatened - Nationally Critically Endangered (red arrow) as early as 2002, and as Endangered under the United States Endangered Species Act (US ESA) in 2017 (blue arrow). The southern island sub-species of Hector's dolphin was downgraded from Threatened - Nationally Endangered to Threatened - Nationally Vulnerable by 2019 (orange arrow) and listed as Threatened under the US ESA in 2017 (blue arrow).

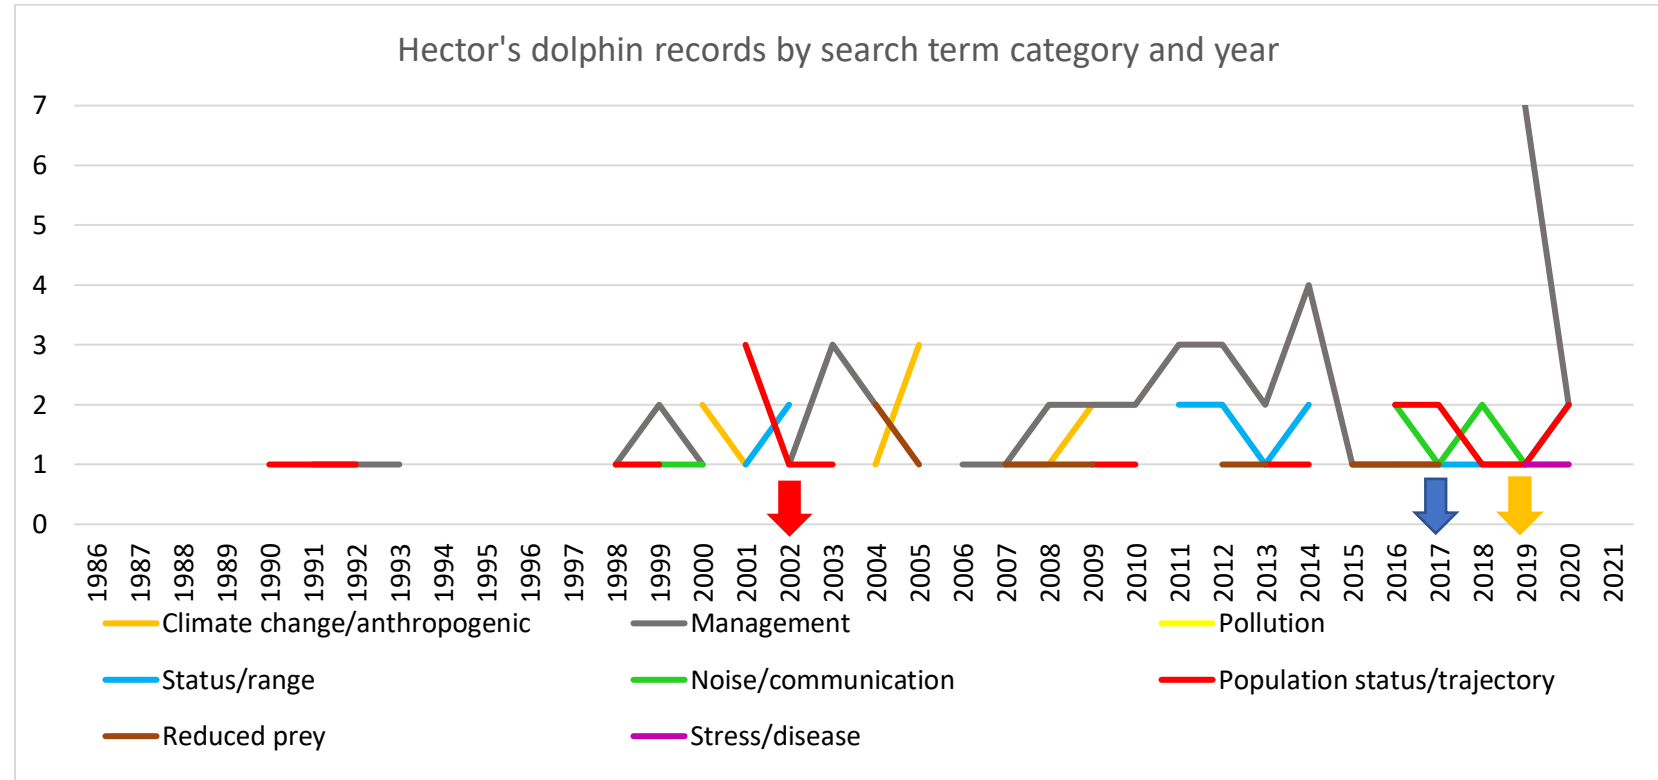

**Supplementary Figure 1D.** The southern resident killer whale was listed as Endangered under the Endangered Species Act in 2005 (red arrow).

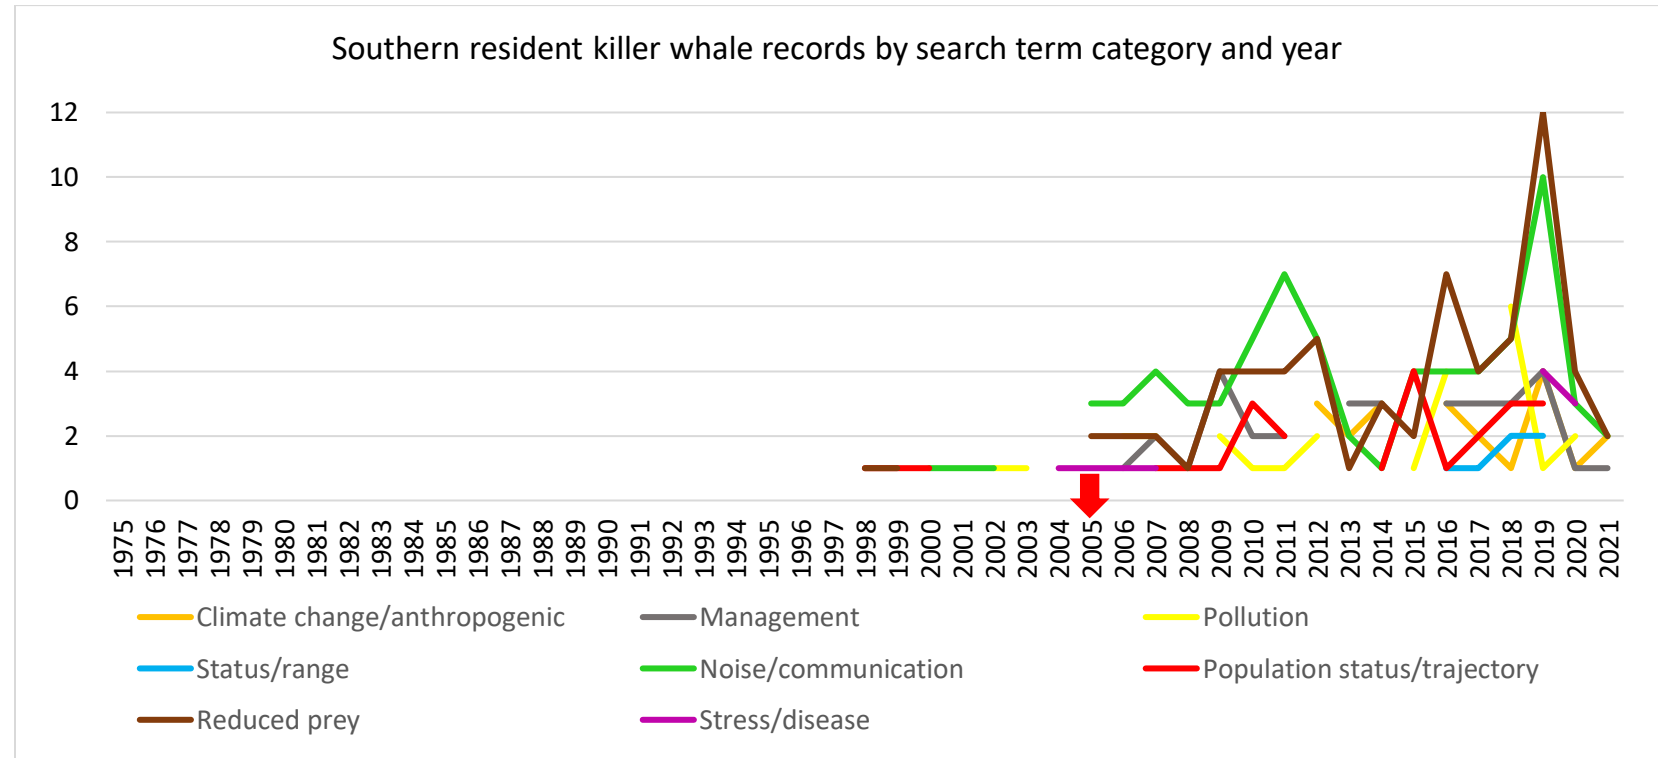

Supplement: Data_Sheet_1.PDF [file Data_Sheet_1.PDF]
