# Supplementary material for: A Systematic Review Demonstrates How Surrogate Populations Help Inform Conservation and Management of an Endangered Species—The Case of Cook Inlet, Alaska Belugas
Source: Frontiers journal article supplement (doi:10.3389/fmars.2022.804218), 2022-03-03
Supplement: Table_1.xlsx [file Table_1.xlsx]

## Sheet: TableS1 - Records from systemat
	Supplementary Table 1. Records of literature for Cook Inlet beluga, St. Lawrence beluga, Hector's dolphin, and southern resident killer whales, 1975-May 2021.
Record Type	Publication Year	Authors	Title	Publication Title	ISBN	DOI	URL	Abstract	Volume	Issue	Pages	# of pages	Series	Series Title	Publisher	Place
Cook Inlet Beluga - Climate change/Anthropogenic
Journal article	2020	Young, N. C.; Delean, B. J.; Helker, V. T.; Freed, J. C.; Muto, M. M.; Savage, K.; Teerlink, S.; Jemison, L. A.; Wilkinson, K.; Jannot, J. E.	Human-Caused Mortality and Injury of NMFS-managed Alaska Marine Mammal Stocks, 2014-2018	NOAA Technical Memorandum NMFS-AFSC		10.25923/X0SV-QG36	https://repository.library.noaa.gov/view/noaa/27496	Section 117 of the Marine Mammal Protection Act (MMPA) requires the National Marine Fisheries Service (NMFS) to estimate human-caused marine mammal mortality and serious injury. Data from documented interactions between human activities and pinnipeds or cetaceans belonging to stocks which appear in the Alaska Marine Mammal Stock Assessment Reports (SARs) were compiled for the 5-year period from 2…			150		Technical Memorandum NMFS AFSC 413
Report	1979	Calkins, Donald G.; Curatolo, James A.	Marine mammals of lower Cook Inlet and the potential for impact from outer continental shelf oil and gas exploration, development, and transport					Petroleum exploration, production and transportation in marine waters have the potential for extensive environmental impacts. Major oil and gas development has taken place in upper Cook Inlet as a result of lease sales held by the State of Alaska between 1959 and 1974. There are five oil and three gas fields with 14 offshore platforms and a submarine pipeline network which carries the majority of…			91				Alaska Department of Fish and Game	Anchorage, AK
Thesis	2005	Goetz, K. T.	Summer Habitat Preference of Beluga Whales (Delphinapterus Leucas) in Cook Inlet, Alaska				https://dukespace.lib.duke.edu/dspace/bitstream/handle/10161/227/Goetz%20MP%202005.pdf?sequence=1&isAllowed=y	The Cook Inlet beluga whale (Delphinapterus leucas) lives in a confined body of water and therefore is susceptible to physical, ecological, and anthropogenic stresses. With approximately 360 animals remaining in the population and ongoing efforts to increase development in the area, it is important to identify habitat preferences of these whales. Advances in technology and statistical methods all…				39			Duke University	Durham, NC
Document	2003	Balsiger, J. W.	Subsistence Harvest Management of Cook Inlet Beluga Whales Final Environmental Impact Statement				https://repository.library.noaa.gov/view/noaa/19217	The stock of beluga whales in Cook Inlet (CI), Alaska, declined by greater than 50 percent between 1994 and 1999 resulting in a depleted determination under the Marine Mammal Protection Act (MMPA). The National Marine Fisheries Service (NMFS) believes that the subsistence harvest of these whales was the principal factor in the decline. This EIS evaluates alternates to manage the subsistence harve…							NOAA Fisheries, NMFS, Alaska Region
Journal article	2013	Boelens, R. D.	Protecting Alaska's Coastal Ecosystems: The Story of the Cook Inlet Belugas	Seattle Journal of Environmental Law					3		181
Report	2009	Lecky, J. H.	Environmental Assessment for the Issuance of a National Marine Fisheries Service Scientific Research Permit and a Permit Amendment for Vessel and Aerial Surveys of Beluga Whales in Cook Inlet, Alaska				https://www.fisheries.noaa.gov/resource/document/environmental-assessment-issuance-national-marine-fisheries-service-scientific-0	The National Marine Fisheries Service (NMFS) proposes to issue a scientific research permit to LGL Alaska Research Associates (LGL; File No.14210) and a permit amendment to NMFS National Marine Mammal Laboratory, (NMML; File No. 782-1719). These would authorize “takes”1 by “level B harassment”2 of marine mammals in the wild pursuant to the Marine Mammal Protection Act of 1972, as amended (MMPA; 1…							NOAA Fisheries, NMFS, Alaska Region	Anchorage, AK
Journal article	2008	Ezer, Tal; Hobbs, Roderick; Oey, Lie-Yauw	On the Movement of Beluga Whales in Cook Inlet, Alaska: Simulations of Tidal and Environmental Impacts Using a Hydrodynamic Inundation Model	Oceanography		10.5670/oceanog.2008.17	https://tos.org/oceanography/article/on-the-movement-of-beluga-whales-in-cook-inlet-alaska-simulations-of-tidal-	The population of beluga whales in Cook Inlet, Alaska, is in decline, and since 2000 these whales have been under consideration for designation as "endangered" under the Endangered species Act (and were placed on the list in October 2008, just before this article went to press). In order to study environmental and hydrodynamic impacts on the belugas' movements and survival in the unique habitat o…	21	4	186-195
Journal article	1996	Shelden, K. E. W.	Impacts of vessel surveys and tagging operations on the behaviour of beluga whales (Delphinapterus leucas) in Cook Inlet, Alaska, 1-22 June 1994	International Whaling Commission. Report			https://media.fisheries.noaa.gov/dam-migration/vessels-surveys-cib0694-akr.pdf	In June of 1994, the National Marine Mammal Laboratory conducted a vessel survey of beluga whales in the northwest corner of Cook Inlet, Alaska. The focus of the survey was a radio-tagging study of a portion of the population found near the Susitna River delta. The impacts of the methods used to tag and study beluga whales from vessel platforms were examined. Using techniques similar to those emp…	46		63-76
Report	2011	SAExploration, Inc.	BIOLOGICAL ASSESSMENT for ALASKA APACHE CORPORTATION Cook Inlet 3D Seimic Program					ALASKA APACHE CORPORTATION (APACHE) is required under Section 7 of the Endangered Species Act (ESA) to consult with the US Fish and Wildlife Service (FWS) and the National Oceanic and Atmospheric Administration (NOAA) National Marine Fisheries Service (NMFS) to ensure that any federal action will not likely jeopardize the existence of any species listed under the ESA or result in the destruction …			133				Alaska Apache Corporation	Anchorage, AK
Journal article	2016	Norman, Stephanie A.; Hobbs, Roderick C.; Goertz, Caroline E. C.; Burek-Huntington, Kathy A.; Shelden, Kim E. W.; Smith, Woutrina A.; Beckett, Laurel A.	Potential natural and anthropogenic impediments to the conservation and recovery of Cook Inlet beluga whales, Delphinapterus leucas	Marine Fisheries Review		10.7755/MFR.77.2.5	http://spo.nmfs.noaa.gov/mfr772/mfr7725.pdf	endangered population of beluga whales, Delphinapterus leucas, found year-round in the waters of Cook Inlet, Alaska, is exposed to a variety of natural and anthropogenic processes that, alone or combined, could compromise their conservation and recovery. Natural risks include stranding, killer whale, Orcinus orca, predation, diseases and parasites, and environmental change. Anthropogenic factors …	77	2	89-105
Journal article	2017	Silber, Gregory K.; Lettrich, Matthew D.; Thomas, Peter O.; Baker, Jason D.; Baumgartner, Mark; Becker, Elizabeth A.; Boveng, Peter; Dick, Dorothy M.; Fiechter, Jerome; Forcada, Jaume; Forney, Karin A.; Griffis, Roger B.; Hare, Jonathan A.; Hobday, Alistair J.; Howell, Daniel; Laidre, Kristin L.; Mantua, Nate; Quakenbush, Lori; Santora, Jarrod A.; Stafford, Kathleen M.; Spencer, Paul; Stock, Char…	Projecting Marine Mammal Distribution in a Changing Climate	Frontiers in Marine Science		10.3389/fmars.2017.00413	http://journal.frontiersin.org/article/10.3389/fmars.2017.00413/full	Climate-related shifts in marine mammal range and distribution have been observed in some populations; however, the nature and magnitude of future responses are uncertain in novel environments projected under climate change. This poses a challenge for agencies charged with management and conservation of these species. Specialized diets, restricted ranges, or reliance on specific substrates or sit…	4		413
Journal article	2021	McGuire, Tamara L.; Stephens, Amber D.; McClung, John R.; Garner, Christopher; Burek-Huntington, Kathleen A.; Goertz, Caroline E. C.; Shelden, Kim E. W.; O’Corry-Crowe, Greg; Boor, Gina K. Himes; Wright, Bruce	Anthropogenic Scarring in Long-term Photo-identification Records of Cook Inlet Beluga Whales, Delphinapterus leucas	Marine Fisheries Review		10.7755/MFR.82.3-4.3	https://spo.nmfs.noaa.gov/content/mfr/anthropogenic-scarring-long-term-photo-identification-records-cook-inlet-beluga-whale	Vessel strikes, entanglement, poaching, intentional harassment, and invasive research are possible direct anthropogenic threats to the endangered Cook Inlet beluga whale, Delphinapterus leucas, population (CIBW) according to the CIBW Recovery Plan. Establishing the prevalence of such threats is necessary for understanding impact and monitoring future trends. We examined records of individual belu…			20-40
Report	2011	CH2MHILL	EVALUATION OF THE EFFECTS OF DISCHARGE PERMIT REAUTHORIZATION ON ENDANGERED SPECIES								492
Document	1995	The Cook Inlet Marine Mammal Council	Native Harvest and Use of Beluga in the Upper Cook Inlet from January through June 1995					Native beluga whale hunters ofthe upper Cook Inlet reported results oftheir beluga hunts during April, May, and June of 1995. Twenty two beluga were taken, eight were sunk, and five were reported wounded. Therefore, a total of 30 whales were reported killed. Larger beluga were whiter and shorter ones were grayer, with some overlap between white and grayish-white around 12 feet oflength. Nearly eq…
Document	1996	The Cook Inlet Marine Mammal Council	Native Harvest and Use of Beluga in the Upper Cook Inlet from July 1, through November 15, 1995 (with updated information for the January through June 1995 period).				https://www.fisheries.noaa.gov/resource/document/native-harvest-and-use-beluga-upper-cook-inlet-january-through-june-1995	Native beluga hunters ofthe upper Cook Inlet reported results oftheir beluga hunts during July, August, September, October, and November of 1995. Seventeen beluga were taken and twelve were reported struck and lost. These statistics are presented by month in this report.
Document	1997	The Cook Inlet Marine Mammal Council	Native Harvest and Use of Beluga Whales in Cook Inlet from April throughout November 1996					Native beluga whale hunters of the Cook Inlet (CI) area reported results of their 1996 beluga hunts. This is the second year for which such data have been documented by the Cook Inlet Marine Mammal Council (CIMMC). Forty-nine beluga whales are known to have been caught (killed and retrieved). The number ofstruck and lost beluga whales is estimated to be one or two times the number caught. CI Nati…
Journal article	2000	Mahoney, B. A.; Shelden, K. E. W.	Harvest History of Belugas, Delphinapterus leucas, in Cook Inlet, Alaska	Marine Fisheries Review			https://www.fisheries.noaa.gov/resource/peer-reviewed-research/harvest-history-belugas-cook-inlet-alaska	Belugas, Delphinapterus leu-The difficulty in obtaining accurate esticas, in Cook Inlet, Alaska, represent a unique mates for the harvest of these whales is due and isolated marine mammal population that to the inability to identify all of the hunters has been hunted for a variety of purposes and, in turn, the size of the harvest. Attempts since prehistoric times. Archeological stud-to reconstruc…	62	3	124-133
Cook Inlet Beluga - Management
Journal article	2016	Carlson, Barbara Svarny; Sims, Christy; Brunner, Sylvia	Cook Inlet beluga whale, Delphinapterus leucas, observations near Anchorage between 2008 and 2011: results from a citizen scientist project	Marine Fisheries Review		10.7755/MFR.77.2.7	http://spo.nmfs.noaa.gov/mfr772/mfr7727.pdf	The Anchorage Coastal Beluga Survey (ACBS) is an independent survey effort staffed by trained citizen scientists. It was developed and run by Friends of the Anchorage Coastal Wildlife Refuge (FAR), in collaboration with the NMFS Alaska Regional Offi ce, National Marine Mammal Laboratory, Defenders of Wildlife, and the Alaska Center for the Environment. After consulting with key biologists, the su…	77	2	115-129
Report	2017	Laidre, K. L.; Hobbs, Roderick C.; Ferrero, Richard C.	Summer, fall, and early winter behavior of beluga whales, Delphinapterus leucas, satellite-tagged in Cook Inlet, Alaska, in 1999 and 2000.				https://repository.library.noaa.gov/view/noaa/15371	The following report contains detailed information on the movement patterns of beluga whales that were satellite-tagged in 1999 and 2000 in Cook Inlet, Alaska. The seasonal movements and dive patterns of three whales CI-9901, CI-0001, and CI-0002 were analyzed, and movement data from the whales tagged in 2000 were referenced to in a subsequent paper by Hobbs et al. (2005). However, the detailed a…			41				NOAA Fisheries, National Marine Fisheries Service, Seattle, WA	Seattle, WA
Journal article	2020	Castellote, M; Small, Rj; Lammers, Mo; Jenniges, J; Mondragon, J; Garner, Cd; Atkinson, S; Delevaux, Jms; Graham, R; Westerholt, D	Seasonal distribution and foraging occurrence of Cook Inlet beluga whales based on passive acoustic monitoring	Endangered Species Research		10.3354/esr01023	https://www.int-res.com/abstracts/esr/v41/p225-243/	A paucity of information on the basic biology and ecology of Cook Inlet beluga whales Delphinapterus leucas remains a decade after the species was listed as endangered in 2008. The causes of its continued decline remain unclear. This lack of knowledge limits our understanding of, and ability to manage, potential threats impeding the recovery of this endangered population. Seasonal distribution an…	41		225-243
Journal article	2015	Shelden, K. E. W.; Goetz, K. T.; Rugh, D. J.; Calkins, D. G.; Mahoney, B. A.; Hobbs, R. C.	Spatio-temporal changes in beluga whale, Delphinapterus leucas, distribution: results from aerial surveys (1977− 2014), opportunistic sightings (1975− 2014), and satellite tagging (1999− 2003) in Cook Inlet. Alaska	Marine Fisheries Review					77	2	2021-01-31
Report	2002	Balsiger, J. W.	Environmental Assessment Co-Management Agreement Between the National Marine Fisheries Service and the Cook Inlet Marine Mammal Council for the Year 2002												NOAA Fisheries, NMFS, Alaska Region	Anchorage, AK
Report	2000	Balsiger, J. W.	Environmental Assessment Co-Management Agreement Between the National Marine Fisheries Service and the Cook Inlet Marine Council for the Year 2000				https://repository.library.noaa.gov/view/noaa/18151				43				NOAA Fisheries, NMFS, Alaska Region	Anchorage, AK
Report	2006	Hobbs, R. C.; Shelden, K. E. W.; Vos, D. J.; Goetz, K. T.; Angliss, R. P.	Status review and extinction assessment of Cook Inlet belugas (Delphinapterus leucas)				https://repository.library.noaa.gov/view/noaa/8592	After completion (in 2005) of the Draft Conservation Plan for Cook Inlet belugas (Delphinapterus leucas) under the Marine Mammal Protection Act (MMPA); the National Marine Fisheries Service (NMFS) recommended that a Status Review be conducted to incorporate new scientific findings available since the publication of a scientific review in 2000 in the journal Marine Fisheries Review 62 (3). NMFS fo…			74					Anchorage, AK
Journal article	2015	Ferguson, Megan C.; Curtice, Corrie; Harrison, Jolie	6. Biologically Important Areas for Cetaceans Within U.S. Waters – Gulf of Alaska Region	Aquatic Mammals		10.1578/AM.41.1.2015.65	http://www.aquaticmammalsjournal.org/index.php?option=com_content&view=category&id=58&Itemid=157	We integrated existing published and unpublished information to delineate Biologically Important Areas (BIAs) for fin, gray, North Pacific right, and humpback whales, and belugas in U.S. waters of the Gulf of Alaska. BIAs are delineated for feeding, migratory corridors, and small and resident populations. Supporting evidence for these BIAs came from aerial-, land-, and vessel-based surveys; satel…	41	1	65-78
Report	2008	Hobbs, R. C.; Shelden, K. E. W.	2008 supplemental status review and extinction assessment of Cook Inlet belugas (Delphinapterus leucas)				https://repository.library.noaa.gov/view/noaa/9027				94			AFSC Processed Report	NOAA Fisheries, National Marine Fisheries Service, Seattle, WA	Seattle, WA
Journal article	2013	Ashford, Julian R.; Ezer, Tal; Jones, Cynthia M.	River discharge predicts spatial distributions of beluga whales in the Upper Cook Inlet, Alaska, during early summer	Polar Biology		10.1007/s00300-013-1330-8	http://link.springer.com/10.1007/s00300-013-1330-8	In the Cook Inlet, a subarctic estuary in Alaska, the endangered population of beluga whales ( Delphinapterus leucas) has not recovered despite regulation of hunting and the reason is not well understood. To examine the potential roles of habitat and food availability, we compared spatial data on distribution and abundance from aerial surveys undertaken during the seasonal transition into early s…	36	8	1077-1087
Journal article	2020	McGuire, Tamara L.; Himes Boor, Gina K.; McClung, John R.; Stephens, Amber D.; Garner, Christopher; Shelden, Kim E.W.; Wright, Bruce	Distribution and habitat use by endangered Cook Inlet beluga whales: Patterns observed during a photo‐identification study, 2005–2017	Aquatic Conservation: Marine and Freshwater Ecosystems		10.1002/aqc.3378	https://onlinelibrary.wiley.com/doi/10.1002/aqc.3378	Cook Inlet beluga whales (CIBWs;Delphinapterus leucas), are an isolated and declining endangered population in Alaska, USA. Their critical habitat has been broadly defined, with little empirical data on habitat use to direct management actions. This article examines data collected during surveys for a long-term photo-ID study to gain insight into the use of critical habitat by CIBW groups and ind…	30	12	2402-2427
Journal article	2000	Moore, S. E.; DeMaster, D. P.	Cook Inlet Belugas, Delphinapterus leucas: Status and Overview	Marine Fisheries Review			https://spo.nmfs.noaa.gov/content/cook-inlet-belugas-delphinapterus-leucas-status-and-overview	This study, conducted at Cook Inlet, Alaska, USA, has indicated a constant decline in the beluga's population. Aerial surveys of Cook Inlet have revealed a constant decline in the abundance of belugas from 653 in 1994 to 435 whales in 2000. Reports of surveys done during the months of June and July 1993 and 2000 reveal that the largest number of belugas was found in Susitna River Delta. Historic …	62	3	2021-01-05
Report	1995	Shelden, K. E. W.; Angliss, R. P.	Characterisation of beluga whale (Delphinapterus leucas) habitat through oceanographic sampling of the Susitna River Delta in Cook Inlet, Alaska, 11-18 June 1994								10				International Whaling Commission
Journal article	2013	Ezer, Tal; Ashford, Julian R.; Jones, Cynthia M.; Mahoney, Barbara A.; Hobbs, Roderick C.	Physical–biological interactions in a subarctic estuary: How do environmental and physical factors impact the movement and survival of beluga whales in Cook Inlet, Alaska?	Journal of Marine Systems		10.1016/j.jmarsys.2012.10.007	https://linkinghub.elsevier.com/retrieve/pii/S0924796312002035	The annual abundance population estimates of the endangered beluga whales in Cook Inlet (CI), Alaska, have indicated a decline in the population over the past decades and no convincing explanation has been offered so far for this trend. Satellite tracking data of about 20 Cook Inlet beluga whales (CIBW) over some 5-year period, as well as annual population counts and stranding reports were compar…	111-112		120-129
Journal article	2014	Plantinga, Andrew J.; Helvoigt, Ted L.; Walker, Kirsten	Critical habitat for threatened and endangered species: How should the economic costs be evaluated?	Journal of Environmental Management		10.1016/j.jenvman.2013.10.025	https://linkinghub.elsevier.com/retrieve/pii/S0301479713006786	The designation of critical habitat is a feature of endangered species protection laws in many countries. Under the U.S. Endangered Species Act, economics cannot enter into decisions to list species as threatened or endangered, but can be considered when critical habitat is designated. Areas can be excluded from proposed critical habitat if the economic cost of including them is determined to exc…	134		127-135
Report	2010	Cornick, L. A.; Saxon-Kendall, L.; Pinney, L.	Distribution, habitat use and behavior of Cook Inlet beluga whales and other marine mammals at the Port of Anchorage Marine Terminal Redevelopment Project May–November 2009				https://media.fisheries.noaa.gov/dam-migration/2008disthabitatuse-akr.pdf				29				Alaska Pacific University	Anchorage, AK
Letter	2015	Lent, R. J.	Marine Mammal Commission comments on draft Cook Inlet beluga recovery plan.				https://www.mmc.gov/wp-content/uploads/belugawhale_recovery-plan_071415.pdf	The Commission’s review of the draft recovery plan includes (1) an assessment of the completeness of the plan, along with suggestions for including other pertinent information that is missing from the plan, and (2) an evaluation of the data with reference to plan recommendations, in accordance with NMFS’s general guidance for peer reviews (NMFS 2010). The Commission is also providing additional i…
Report	2016	National Marine Fisheries Service, Alaska Region	Recovery Plan for the Cook Inlet Beluga Whale (Delphinapterus leucas)				https://repository.library.noaa.gov/view/noaa/15979				284				NOAA Fisheries, NMFS, Alaska Region	Anchorage, AK
Journal article	2015	Shelden, Kim; Hobbs, Rod	The Status of Beluga Whales, Delphinapterus leucas, in Cook Inlet, Alaska, and Surrounding Waters: Part I: Preface	Marine Fisheries Review		10.7755/MFR.77.1.p	http://spo.nmfs.noaa.gov/mfr771/mfr771preface.pdf		77	1
Journal article	2001	Edmonds, S.	A Whale's Tale: Efforts To Save The Cook Inlet, Alaska Beluga Whale	Ocean & Coastal LJ					7		131
Report	2008	Hobbs, R. C.; Shelden, K. E. W.; Rugh, D. J.; Norman, S. A.	2008 Status review and extinction risk assessment of Cook Inlet belugas (Delphinapterus leucas)				https://archive.fisheries.noaa.gov/afsc/Publications/ProcRpt/PR%202008-02.pdf								NOAA Fisheries, National Marine Fisheries Service, Seattle, WA	Seattle, WA
Report	2005	Pennoyer, S.	Environmental Assessment Co-Management Agreement Between the National Marine Fisheries Service and the Cook Inlet Marine Mammal Council for the year 2005								80				NOAA Fisheries, NMFS, Alaska Region	Anchorage, AK
Journal article	2016	Breton-Honeyman, Kaitlin; Furgal, Chris M.; Hammill, Michael O.	Systematic Review and Critique of the Contributions of Traditional Ecological Knowledge of Beluga Whales in the Marine Mammal Literature + Supplementary Appendix Table (See Article Tools)	ARCTIC		10.14430/arctic4543	https://journalhosting.ucalgary.ca/index.php/arctic/article/view/67584	In this study we systematically review and critique literature containing Traditional Ecological Knowledge (TEK) of the beluga (<em>Delphinapterus leucas</em>) as a case study to gain insights into TEK’s contributions to the marine mammal literature over the past four decades. We reviewed multiple searchable online databases, collected both academic and grey literature, and categorized it by geog…	69	1	37
Report	2017	Consensus Building Institute	Cook Inlet Beluga Whale Research Methods Workshop				https://www.fisheries.noaa.gov/resource/document/cook-inlet-beluga-whale-research-methods-workshop-report				366
Report	2010		Cook Inlet Beluga Whale Science Conference				https://www.fisheries.noaa.gov/resource/document/2010-cook-inlet-beluga-whale-science-conference-presentations				533					Anchorage, AK
Report	2014	National Marine Fisheries Service, Alaska Region	Cook Inlet Beluga Whale Conference Program and Abstracts				https://www.fisheries.noaa.gov/resource/document/2014-cook-inlet-beluga-whale-science-conference-presentations				333
Report	2011	Easly-Appleyard, B.; Pinney, L.; Polasek, L.; Prewitt, J.; McGuire, T.	Alaska SeaLife Center Cook Inlet Beluga Whale Remote Monitoring Pilot Study May – August 2011				https://www.fisheries.noaa.gov/resource/document/alaska-sealife-center-cook-inlet-beluga-whale-remote-monitoring-pilot-study-may				49				Alaska SeaLife Center and LGL
Report	2011	Stephen R. Braund and Associates; Huntington Consulting	Relationship Between the Native Village of Tyonek, Alaska and Beluga Whales in Cook Inlet, Alaska				https://www.fisheries.noaa.gov/resource/document/relationship-between-native-village-tyonek-alaska-and-beluga-whales-cook-inlet	This report is based on research conducted by Stephen R. Braund & Associates (SRB&A) and Henry Huntington of Huntington Consulting. The purpose of the study is to document the relationship between the residents of Tyonek, Alaska and beluga (Delphinapterus Leucas) whales in Cook Inlet. The study team conducted a literature review in addition to fieldwork in the community of Tyonek, during which re…			100
Report	2013	Brueggeman, J.; Lenz, D.; Wahl, M.	Beluga Whale and Other Marine Mammal Occurrence in Upper Cook Inlet between Point Campbell and Fire Island, Alaska August – November 2011 and April – July 2012				https://www.fisheries.noaa.gov/resource/document/beluga-whale-and-other-marine-mammal-occurrence-upper-cook-inlet-between-point	Land-based observations were conducted from August 3 to November 15, 2011 and again from April 2 to July 31, 2012 to document the occurrence of beluga whales and other marine mammals in Upper Cook Inlet between the mainland and Fire Island for Cook Inlet Regional Corporation (CIRI). The April through November study period coincided with the time most of the beluga population inhabits the Upper In…			53
Journal article	2011	Carter, Brian T.G.; Nielsen, Erik A.	Exploring ecological changes in Cook Inlet beluga whale habitat though traditional and local ecological knowledge of contributing factors for population decline	Marine Policy		10.1016/j.marpol.2010.10.009	https://linkinghub.elsevier.com/retrieve/pii/S0308597X10001776		35	3	299-308
Report	2008	Cornick, L. A.; Saxon-Kendall, L.	Distribution, Habitat Use, and Behavior of Cook Inlet Beluga Whales in Knik Arm, Fall 2007								28				Integrated Concepts and Research Corporation
Report	2009	Cornick, L. A.; Saxon-Kendall, L.	Distribution, Habitat Use and Behavior of Cook Inlet Beluga Whales and Other Marine Mammals at the Port of Anchorage Marine Terminal Redevelopment Project June – November, 2008 Scientific Marine Mammal Monitoring Report for 2008				https://www.fisheries.noaa.gov/resource/document/distribution-habitat-use-and-behavior-cook-inlet-beluga-whales-and-other-marine				29				US DOT, Port of Anchorage, & Integrated Concepts and Research Corporation
Report	2011	Cornick, L. A.; Love, S.; Pinney, L.; Smith, C.; Zartler, Z.	Distribution, Habitat Use and Behavior of Cook Inlet Beluga Whales and Other Marine Mammals at the Port of Anchorage Marine Terminal Redevelopment Project June – November 2011 Scientific Marine Mammal Monitoring Program 2011 Annual Report				https://www.fisheries.noaa.gov/resource/document/distribution-habitat-use-and-behavior-cook-inlet-beluga-whales-and-other-marine-0	This report summarizes the 2011 activities of the Scientific Marine Mammal Monitoring Program (Scientific Program). The Scientific Program was conducted for the US Department of Transportation, Maritime Administration (Maritime Administration), the Port of Anchorage (POA), and Integrated Concepts and Research Corporation (ICRC), in conjunction with the Port of Anchorage Intermodal Expansion Proje…			55				US DOT, Port of Anchorage, & Integrated Concepts and Research Corporation
Report	2012	Dutton, I. M.; Klein, J. R.; Cain, K. J.; Deel, R.; Federer, R.; Hunt, J.	An Oral History of Habitat Use by Cook Inlet Belugas in Waters of the Kenai Peninsula Borough				https://www.fisheries.noaa.gov/resource/document/oral-history-habitat-use-cook-inlet-belugas-waters-kenai-peninsula-borough	This project was funded by the Kenai Peninsula Borough (KPB) in April 2011 as part of a suite of five projects designed to provide the Borough with a greater insight into the status and management needs of Cook Inlet Beluga Whales (CIBW). CIBW are the subject of much public interest and concern due both to their intrinsic cultural values, particularly for Cook Inlet natives who traditionally hunt…			109				Alaska SeaLife Center
Presentation	2012	Easley-Appleyard, B.	Cook Inlet beluga whale behavioral observations via video-monitoring				https://www.fisheries.noaa.gov/resource/document/cook-inlet-beluga-whale-behavioral-observations-video-monitoring-2011	Alaska SeaLife Center initiated the Cook Inlet Beluga Remote Monitoring pilot study in the summer of 2011. Two cameras were located 1.5 miles up the Little Susitna River Objectives: •Evaluate the capabilities of remote video monitoring. •Monitor the frequency of occurrence, relative abundance, and surface behavior of beluga whales.								Anchorage, AK
Report	2011	Ezer, T.	Using inundation modeling and remote sensing data to study hydrodynamic and environmental impacts on the survival of Cook Inlet’s Beluga whales					The population of the endangered Cook Inlet Beluga Whales (CIBW) in Alaska has been in decline over the past decades and no convincing explanation has been offered so far for this trend. Therefore, the aim of this project was to continue the analysis of satellite-tracked beluga whale movements (Hobbs et al., 2005; Ezer et al., 2008) and study how environmental parameters such as inlet morphology,…			14				NOAA
Report	2013	Ezer, T.	Cook Inlet Beluga Whale Research: Study of Physical and Biological Factors that Impact the Beluga’s Population Final Project Report, November, 2013				https://www.fisheries.noaa.gov/resource/document/cook-inlet-beluga-whale-research-study-physical-and-biological-factors-impact				26
Journal article	2000	Ferrero, R. C.; Moore, S. E.; Hobbs, R. C.	Development of Beluga, Delphinapterus leucas, Capture and Satellite Tagging Protocol in Cook Inlet, Alaska	Marine Fisheries Review				Attempts to capture and place satellite tags on belugas, Delphinapterus leucas, in Cook Inlet, Alaska were conducted during late spring and summer of 1995, 1997, and 1999. In 1995, capture attempts using a hoop net proved impractical in Cook Inlet. In 1997, capture efforts focused on driving belugas into nets. Although this method had been successful in the Canadian High Arctic, it failed in Cook…	62	3	112-123
Journal article	2007	Goetz, Kt; Rugh, Dj; Read, Aj; Hobbs, Rc	Habitat use in a marine ecosystem: beluga whales Delphinapterus leucas in cook inlet, alaska	Marine Ecology Progress Series		10.3354/meps330247	http://www.int-res.com/abstracts/meps/v330/p247-256/		330		247-256
Journal article	2012	Goetz, Kt; Montgomery, Ra; Ver Hoef, Jm; Hobbs, Rc; Johnson, Ds	Identifying essential summer habitat of the endangered beluga whale Delphinapterus leucas in Cook Inlet, Alaska	Endangered Species Research		10.3354/esr00394	http://www.int-res.com/abstracts/esr/v16/n2/p135-147/	In response to the critically low numbers of beluga whales Delphinapterus leucas in Cook Inlet, Alaska, USA, the US federal government listed this isolated population as endangered in 2008. Despite the curtailment of subsistence hunting in 1999, the abundance of Cook Inlet belugas has remained low (<400 whales), with no obvious signs of recovery. As habitat is a critical component of population v…	16	2	135-147
Report	2012	Goetz, K. T.; Robinson, P. W.; Hobbs, R. C.; Laidre, K. L.; Huckstadt, L. A.; Shelden, K. E. W.	Movement and dive behavior of beluga whales in Cook Inlet, Alaska.				https://www.fisheries.noaa.gov/resource/document/movement-and-dive-behavior-beluga-whales-cook-inlet-alaska	Limited information exists on the foraging behavior of the endangered population of beluga whales (Delphinapterus leucas) in Cook, Inlet, Alaska, especially during the winter months with heavy ice-cover. We used satellite telemetry to record the movement (n = 14) and diving (n = 11) behavior of whales across 3 years (1999-2003), including the winter months. Whales remained in Cook Inlet the entir…			40				Alaska Fish. Sci. Cent., NOAA, Natl. Mar. Fish. Serv.
Report	1999	Hansen, D. J.; Hubbard, J. D.	Distribution of Cook Inlet Beluga Whales (Delphinapterus leucas) in Winter				https://www.fisheries.noaa.gov/resource/document/distribution-cook-inlet-beluga-whales-winter-final-report	Beluga whales (Delphinapterus leucas) commonly occur in Cook Inlet during summer and autumn (May through October). However, little information is available on their distribution during the winter. Ten aerial surveys were conducted in Cook Inlet from 12 February through 14 March 1997. Some surveys were extended to include the lower Kenai Peninsula, Shelikof Strait, Kodiak Island, and Yakutat Bay a…			75				US Department of the Interior, Minerals Management Service	Anchorage, AK
Journal article	2010	Hobbs, R.C.; Laidre, K.L.; Vos, D.J.; Mahoney, B.A.; Eagleton, M.	Movements and Area Use of Belugas, <i>Delphinapterus leucas</i>, in a Subarctic Alaskan Estuary	Arctic		10.14430/arctic447	https://journalhosting.ucalgary.ca/index.php/arctic/article/view/63508	Seasonal movements of 14 belugas in Cook Inlet, Alaska, were monitored by satellite telemetry between July and March in 2000-03. Whales used waters in the upper Cook Inlet intensively between summer and late autumn and dispersed to mid-inlet offshore waters during winter months. All whales remained in Cook Inlet the entire time they were tracked, and several whales were tracked through March. Dur…	58	4	331-340
Journal article	2000	Huntington, H. P.	Traditional Knowledge of the Ecology of Belugas, Delphinapterus leucas, in Cook Inlet, Alaska	Mar Fish Rev			https://spo.nmfs.noaa.gov/content/traditional-knowledge-ecology-belugas-delphinapterus-leucas-cook-inlet-alaska	The population of belugas, Delphinapterus leucas, in Cook Inlet, Alaska, is geographically isolated and appears to be declining. Conservation efforts require appropriate information about population levels and trends, feeding and behavior, reproduction, and natural and anthropogenic impacts. This study documents traditional ecological knowledge of the Alaska Native hunters of belugas in Cook Inle…	62	3	134-140
Journal article	2000	Laidre, K. L.; Shelden, K. E. W.; Rugh, D. J.; Mahoney, B. A.	Beluga, Delphinapterus leucas, Distribution and Survey Effort in the Gulf of Alaska	Mar Fish Rev			http://spo.nwr.noaa.gov/mfr623/mfr6234.pdf	Beluga, Delphinapterus leucas, distribution in the Gulf of Alaska and adjacent inside waters was examined through a review of surveys conducted as far back as 1936. Although beluga sightings have occurred on almost every marine mammal survey in northern Cook Inlet (over 20 surveys reported here), beluga sightings have been rare outside the inlet in the Gulf of Alaska. More than 150,000 km of dedi…	62	3	27-36
Journal article	2000	Lerczak, J. A.; Shelden, K. E. W.; Hobbs, R. C.	Application of Suction-cup-attached VHF Transmitters to the Study of Beluga, Delphinapterus leucas, Surfacing Behavior in Cook Inlet, Alaska	Mar Fish Rev			https://www.fisheries.noaa.gov/resource/peer-reviewed-research/application-suction-cup-attached-vhf-transmitters-study-beluga	Suction-cup-attached VHF radio transmitters, was 1.8 sec (SD=0.3 sec, radio transmitters were deployed on belu-n=125) for one of the whales. Videotaped gas, Delphinapterus leucas, in Cook Inlet, behaviors were categorized as “head-lifts” Alaska, in 1994 and 1995 to characterize the or “slow-rolls.” Belugas were more likely whales’surfacing behavior. Data from video to head-lift than to slow-roll …	62	3	99-111
Report	2007	Markowitz, T. M.; McGuire, T.	Temporal-spatial distribution, movements and behavior of beluga whales near the Port of Anchorage, Alaska				https://www.fisheries.noaa.gov/resource/document/temporal-spatial-distribution-movements-and-behavior-beluga-whales-near-port				93				Integrated Concepts and Research Corporation
Report	2007	Markowitz, T. M.; McGuire, T.; Savarese, D. M.	Monitoring beluga whale (Delphinapterus leucas) distribution and movements in Turnagain Arm along the Seward Highway								42				HDR Alaska	Anchorage, AK
Report	2009	McGuire, T.; Bourdon, M. L.	Pre-Deployment Visual Monitoring for Beluga Whales in and near the Cook Inlet Tidal Energy Project Proposed Deployment Area, June-November 2009.				https://www.fisheries.noaa.gov/resource/document/pre-deployment-visual-monitoring-beluga-whales-and-near-cook-inlet-tidal-energy-0	Introduction Cook Inlet is home to some of the greatest tidal energy potential in the United States. It is also home to an endangered population of beluga whales (Delphinapterus leucas). Successful permitting and operation of an ORPC tidal power project near Fire Island in Upper Cook Inlet will require assessment of the potential and realized effects of the sound footprint and physical presence o…			98				Ocean Renewable Power Company	Anchorage, AK
Report	2011	McGuire, T.; Bourdon, M. L.; Kirchner, R.	Pre-Deployment Visual Monitoring for Beluga Whales in and near the Cook Inlet Tidal Energy Project Proposed Deployment Area, May-November 2010.				https://www.fisheries.noaa.gov/resource/document/pre-deployment-visual-monitoring-beluga-whales-and-near-cook-inlet-tidal-energy	South-central Alaska’s Cook Inlet is home to some of the greatest tidal energy potential in the United States. It is also home to an endangered population of beluga whales (Delphinapterus leucas). Successful permitting and operation of a tidal power project in Cook Inlet will require a rigorous biological assessment of the potential and realized effects of the sound footprint and physical presenc…			86				Ocean Renewable Power Company	Anchorage, AK
Journal article	2000	Moore, S. E.; Shelden, K. E. W.; Litzky, L. K.; Mahoney, B. A.; Rugh, D. J.	Beluga, Delphinapterus leucas, Habitat Associations in Cook Inlet, Alaska	Mar Fish Rev			http://spo.nwr.noaa.gov/mfr623/mfr6237.pdf	A review of available infor-although such events likely affect water mation describing habitat associations for quality and, potentially, prey availability. belugas, Delphinapterus leucas, in Cook Similarly, although sewage effluent and dis-Inlet was undertaken to complement popu-charges from industrial and military activilation assessment surveys from 1993–2000. ties along Cook Inlet negatively …	62	3	60-80
Report	1979	Murray, N.	Belukha whales in lower Cook Inlet: Environmental assessment of the Alaskan continental shelf				https://www.fisheries.noaa.gov/resource/peer-reviewed-research/beluga-whales-lower-cook-inlet-environmental-assessment-alaskan	The Cook Inlet beluga population has been estimated by Klinkhard (1966) at 300 to 400. Recent surveys conducted in the Inlet to determine distribution and abundance have not changed this estimate. Most surveys have involved shoreline observations and have not been intensive surveys of the open water areas of the inlet. Accurate counting methods need to be developed so that a better population est…			17
Report	1994	Withrow, D. E.; Shelden, K. E. W.; Rugh, D. J.; Hobbs, R. C.	Beluga Whale, Ddphinapterus Leucas, Distribution and Abundance in Cook Inlet, 1993				https://www.fisheries.noaa.gov/resource/document/marine-mammal-assessment-program-status-stocks-and-impacts-incidental-take-1993	This report is the first of a multi-year study to determine the distribution and abtmdance of beluga whales, Delphinapterus leucas, in Cook Inlet, Alaska. 1n 1993, we conducted a literature review, supported a genetics study to assess stock identity, tested survey methods, and performed distributional studies of belugas in Cook lnlet 2-5 June, 25-29 July, and 3, 18 & 19 September. Virtually all (…			128-153				Alaska Fish. Sci. Cent., NOAA, Natl. Mar. Fish. Serv.	Seattle, WA
Report	2010	ENTRIX	Final RIR/4(b)(2) Preparatory Assessment/FRFA for the Critical Habitat Designation of Cook Inlet Beluga Whale								247				NOAA Fisheries Service Alaska Region Division of Protection Resources	Anchorage, AK
document	2011	NMFS, NOAA	Endangered and Threatened Species: Designation of Critical Habitat for Cook Inlet Beluga Whale				We, the National Marine Fisheries Service (NMFS), designate critical habitat for the Cook Inlet beluga whale (Delphinapterus leucas) distinct population segment (DPS) under the Endangered Species Act (ESA). Two areas are designated, comprising 7,800 square kilometers (3,013 square miles) of marine habitat. In developing this final rule we considered public and peer review comments, as well as eco…	We, the National Marine Fisheries Service (NMFS), designate critical habitat for the Cook Inlet beluga whale (Delphinapterus leucas) distinct population segment (DPS) under the Endangered Species Act (ESA). Two areas are designated, comprising 7,800 square kilometers (3,013 square miles) of marine habitat. In developing this final rule we considered public and peer review comments, as well as eco…							Department of Commerce
Presentation	2011	Pinney, L.; Easley-Appleyard, B.; Polasek, L.; Prewitt, J.; McGuire, T.	Spatial and temporal distribution of Cook Inlet beluga whales (Delphinapterus leucas) in the Little Susitna River Delta
Journal article	2015	Polasek, Lori; McGuire, Tamara; Prewitt, Jill; Easley-Appleyard, Bonnie; Pinney, Leigh	Assessment of remote video for monitoring beluga whales, Delphinapterus leucas, of Cook Inlet, Alaska	Marine Fisheries Review		10.7755/MFR.77.1.6	http://spo.nmfs.noaa.gov/mfr771/mfr7716.pdf		77	1	59-69
Journal article	2000	Speckman, S. G.; Piatt, J. F.	Historic and Current Use of Lower Cook Inlet, Alaska, by Belugas, Delphinapterus leucas	Mar Fish Rev				Dedicated at-sea surveys for marine birds and mammals conducted in lower Cook Inlet in late July and early August from 1995–99 failed to locate any belugas, Delphinapterus leucas. Surveys covered a total of 6,249 linear km and were conducted in both nearshore and offshore habitats. Sightings included 791 individual marine mammals of 10 species. Both historical data and local knowledge indicate th…	62	3	22-26
Report	2010	U.S. Department ofDefense; U.S. Army Pacific Command,; U.S. Army Garrison Alaska	Beluga Observational Studies on Eagle River Flats, Fort Richardson, Alaska 2009				https://www.fisheries.noaa.gov/resource/document/beluga-observational-studies-eagle-river-flats-fort-richardson-alaska-2009	In 2004, USAG-Alaska entered into a settlement agreement with plaintiffs requiring Army environmental personnel to, among other things, monitor the health and behavior of beluga whale (Delphinapterus leucas) in and around Eagle River Flats.			38					Fort Richardson, Alaska
Presentation	2010	Vate-Brattstrom, L.; Sims, C.; Hobbs, R. C.; Mahoney, B. A.	Cook Inlet Beluga Whale Opportunistic Sightings Database: A Summary of Opportunistic Sightings During the Past 35 Years				https://www.fisheries.noaa.gov/resource/document/cook-inlet-beluga-whale-opportunistic-sightings-database-summary-opportunistic	Poster on database of recent sightings and historic reports of beluga whales in Cook Inlet, Alaska
Report	1994	Waite, J. M.; Hobbs, R. C.	GROUP COUNT ESTIMATES AND ANALYSIS OF SURFACING BEHAVIOR OF BELUGA WHALES FROM AERIAL VIDEO IN COOK INLET, ALASKA, 1994				https://www.fisheries.noaa.gov/resource/data/group-count-estimates-and-analysis-surfacing-behavior-beluga-whales-aerial-video-cook								National Marine Mammal Laboratory National Marine Fisheries Service, NOAA
Journal article	2018	O’Corry-Crowe, Greg; Suydam, Robert; Quakenbush, Lori; Potgieter, Brooke; Harwood, Lois; Litovka, Dennis; Ferrer, Tatiana; Citta, John; Burkanov, Vladimir; Frost, Kathy; Mahoney, Barbara	Migratory culture, population structure and stock identity in North Pacific beluga whales (Delphinapterus leucas)	PLOS ONE		10.1371/journal.pone.0194201			13	3	e0194201
Cook Inlet Beluga - Pollution
Journal article	2013	Hoguet, Jennifer; Keller, Jennifer M.; Reiner, Jessica L.; Kucklick, John R.; Bryan, Colleen E.; Moors, Amanda J.; Pugh, Rebecca S.; Becker, Paul R.	Spatial and temporal trends of persistent organic pollutants and mercury in beluga whales (Delphinapterus leucas) from Alaska	Science of The Total Environment		10.1016/j.scitotenv.2013.01.072	https://linkinghub.elsevier.com/retrieve/pii/S0048969713001277	Remote locations, such as the Arctic, are often sinks for persistent contaminants which can ultimately bioaccumulate in local wildlife. Assessing temporal contaminant trends in the Arctic is important in understanding whether restrictions on legacy persistent organic pollutants (POPs) have led to concentration declines. Beluga whale (Delphinapterus leucas) tissue samples were collected from two s…	449		285-294
Journal article	2004	Krahn, M. M.; Herman, D. P.; Ylitalo, G. M.; Sloan, C. A.; Burrows, D. G.	Stratification of lipids, fatty acids and organochlorine contaminants in blubber of white whales and killer whales	Journal of Cetacean Research and Management				The biopsy - via dart. trocar or surgery - is becoming the preferred protocol for sampling skin and blubber of many cetacean species, because a small sample from a healthy animal may provide better information than a larger sample collected via necropsy from an ill or emaciated animal. Furthermore, the biopsy is often the only means of obtaining samples (e.g. for threatened or endangered species)…	6	2	175-189
Journal article	1999	Krahn, M. M.; Burrows, D. G.; Stein, J. E.; Becker, P. R.; Schantz, M. M.; Muir, D. C. G.; O'Hara, T. M.; Rowles, T.	White whales (Delphinapterus leucas) from three Alaskan stocks: concentrations and patterns of persistent organochlorine contaminants in blubber	Journal of Cetacean Research and Management				White whale (Delphinapterus leucas) blubber samples from three of the five different Alaskan stocks, Cook Inlet (n=20), Eastern Chukchi Sea (n=19), and Eastern Beaufort Sea (n=2), were analyzed for levels and patterns of chemical contaminants. Blubber from these whales contained ΣPCBs, ΣDDTs, Σchlordanes, HCB, dieldrin, mirex, Σtoxaphene, and ΣHCH, generally in concentration ranges similar to tho…	1	3	239-249
Journal article	2000	Becker, P. R.; Krahn, M. M.; Mackey, E. A.; Demiralp, R.; Schantz, M. M.; Epstein, M. S.; Donais, M. K.; Porter, B. J.; Muir, D. C. G.; Wise, S. A.	Concentrations of Polychlorinated Biphenyls (PCB’s), Chlorinated Pesticides, and Heavy Metals and Other Elements in Tissues of Belugas, Delphinapterus leucas, from Cook Inlet, Alaska	Mar Fish Rev				Tissues from Cook Inlet beluga whales, Delphinapterus leucas, that were collected as part of the Alaska Marine Mammal Tissue Archival Project were analyzed for polychlorinated biphenyls (PCB’s), chlorinated pesticides, and heavy metals and other elements. Concentrations of total PCB’s (ΣPCB’s), total DDT (ΣDDT), chlordane compounds, hexachlorobenzene (HCB), dieldrin, mirex, toxaphene, and hexachl…	62	3	81-98
Report	2001	Becker, P. R.; Pugh, R. S.; Schantz, M. M.; Mackey, E. A.; Demiralp, R.; Epstein, M. S.; Donais, M. K.; Porter, B. J.; Wise, S. A.; Mahoney, B. A.	Persistent Chlorinated Compounds and Elements in Tissues of Cook Inlet Beluga Whales, Delphinapterus leucas, Banked by the Alaska Marine Mammal Tissue Archival Project								60				U.S. Department of Commerce, USGS
Journal article	2011	Reiner, Jessica L.; O’Connell, Steven G.; Moors, Amanda J.; Kucklick, John R.; Becker, Paul R.; Keller, Jennifer M.	Spatial and Temporal Trends of Perfluorinated Compounds in Beluga Whales ( <i>Delphinapterus leucas</i> ) from Alaska	Environmental Science & Technology		10.1021/es103560q	https://pubs.acs.org/doi/10.1021/es103560q	Wildlife from remote locations have been shown to bioaccumulate perfluorinated compounds (PFCs) in their tissues. Twelve PFCs, consisting of perfluorinated carboxylic (PFCA) and sulfonic (PFSA) acids as well as the perfluorooctane sulfonate (PFOS) precursor perfluorooctane sulfonamide (PFOSA), were measured in livers of 68 beluga whales (Delphinapterus leucas) collected from two subpopulations, C…	45	19	8129-8136
Report	2012	Reiner, Jessica L.; Hoguet, Jennifer; Keller, Jennifer M.; O'Connell, Steven G.; Kucklick, John R.; Bryan, Colleen E.; Davis, W. Clay; Moors, Amanda; Pugh, Rebecca; Becker, Paul R.	Organohalogen Contaminants and Mercury in Beluga Whale Tissues Banked by the Alaska Marine Mammal Tissue Archival Project				https://nvlpubs.nist.gov/nistpubs/ir/2012/NIST.IR.7860.pdf				NIST IR 7860				National Institute of Standards and Technology
Report	2010	URS Corp.	Chemical exposures for Cook Inlet beluga whales: a literature review and evaluation.					The National Marine Fisheries Service (NMFS) is currently implementing management strategies that are geared towards promoting the recovery of the beluga whale population in Cook Inlet. The Conservation Plan for this beluga population includes a number of elements related to ensuring the survival and reproductive success of the whales. The Cook Inlet population of beluga whales has declined from …			59				NOAA Fisheries, National Marine Fisheries Service, Anchorage, Alaska	Anchorage, AK
Cook Inlet Beluga - Status/Range
Report	2018	IUCN	Delphinapterus leucas (Cook Inlet subpopulation): Lowry, L., Hobbs, R. & O’Corry-Crowe, G.: The IUCN Red List of Threatened Species 2019: e.T61442A50384653				https://www.iucnredlist.org/species/61442/50384653	This assessment has been regenerated.							International Union for Conservation of Nature
Journal article	2007		BELUGAS ON THE BRINK	Science		10.1126/science.316.5826.809b	https://www.sciencemag.org/lookup/doi/10.1126/science.316.5826.809b	The article reports on the proposed listing of the belugas, toothed white whales, as endangered species. They are considered a distinct population that has been isolated over the years but their number reduced to only 302. According to National Marine Fisheries Service, belugas will soon be extinct if federal government will not list them as endangered. Rod Hobbs, a marine mammal biologist, claim…	316	5826	809b-809b
Journal article	2018	Wolf, Nathan; Harris, Bradley P.; Richárd, Natalie; Sethi, Suresh A.; Lomac-Macnair, Kate; Parker, Lisa	High-frequency aerial surveys inform the seasonal distribution of Cook Inlet beluga whales: Cook Inlet Beluga Whale Distribution	Wildlife Society Bulletin		10.1002/wsb.922	http://doi.wiley.com/10.1002/wsb.922	Management options to mitigate potential effects from the overlap of anthropogenic and marine mammal activities require understanding of species' habitat use and movement patterns. We analyzed high temporal frequency industrial marine mammal monitoring program aerial surveys conducted over a protracted period from April to October of 2013 and 2014 to examine beluga whale (Delphinapterus leucas) e…	42	4	577-586
Journal article	2010	Rugh, Dj; Shelden, Kew; Hobbs, Rc	Range contraction in a beluga whale population	Endangered Species Research		10.3354/esr00293	http://www.int-res.com/abstracts/esr/v12/n1/p69-75/	The small, isolated population of beluga whales Delphinapterus leucas in Cook Inlet, Alaska, USA, has had a distinct contraction in range over the past 3 decades. This contraction is a function of a decline in abundance, evidently caused, at least in part, by high takes during unregulated subsistence hunting. During the 1990s, hunting resulted in takes of over 50 whales yr–1, all of which occurre…	12	1	69-75
Report	2016	Silber, G. K.; Lettrich, M.; Thomas, P. O.; Baker, J. D.; Baumgartner, M.; Becker, E. A.; Boveng, P. L.; Dick, D.; Fiechter, J.; Forcada, J.	Report of a Workshop on Best Approaches and Needs for Projecting Marine Mammal Distributions in a Changing Climate, Santa Cruz, California, USA, 12-14 January 2016/Gregory K. Silber, Mathew Lettrich, and Peter O. Thomas (eds.); contributors and workshop participants: Jason Baker, Mark Baumgartner, Elizabeth A. Becker, Peter Boveng, Dorothy Dick, Jerome Fiechter, Jaume Forcada, Karin A. Forney, Ro…													Santa Cruz, California
Report	2006	IUCN	Delphinapterus leucas (Cook Inlet subpopulation): Lowry, L., O’Corry-Crowe, G. & Goodman, D.: The IUCN Red List of Threatened Species 2012: e.T61442A17691385				http://www.iucnredlist.org/details/61442/0								International Union for Conservation of Nature
Cook Inlet Beluga -Noise/Communication
Journal article	2011	Castellote, Manuel; Small, Robert J.; Atkinson, Shannon; Lammers, Marc O.; jenniges, Justin; Rosinski, Anne; Garner, Chris; Moore, Sue; Au, Whitlow W. L.	Acoustic monitoring of beluga whales ( <i>Delphinapterus leucas</i> ) in Cook Inlet, Alaska	The Journal of the Acoustical Society of America		10.1121/1.3654879	http://asa.scitation.org/doi/10.1121/1.3654879		130	4	2459-2459
Presentation	2012	Fertl, Dagmar; A, Pacini; Richlen, Michael; Fulling, Greg; KC, Lestyk	First noise measurements of an oscillator system for drilled shafts: Its implications for the endangered Cook Inlet beluga whale (Delphinapterus leucas)					The Knik Arm Crossing project is proposed to be built in Upper Cook Inlet, within critical habitat for the endangered Cook Inlet beluga whale (CIBW). Marine pile-driving produces high sound pressure levels that are often of concern for marine mammals. Alternatively, oscillator systems have been used to excavate and place piles for various bridge construction projects; until now, only qualitative …								Anchorage, AK
Thesis	2015	Blevins, R. B.	Sound and human impacts on beluga whales in Cook Inlet, Alaska				http://hdl.handle.net/11122/6420	Cook Inlet beluga whales (CIBs) are a geographically and genetically isolated population residing in Cook Inlet, Alaska year round. The population declined by approximately 50% between 1994 and 1998 and was listed as endangered under the Endangered Species Act in 2008. The original decline was attributed to overharvest; however, the population has failed to rebound despite the virtual absence of …				176			University Alaska Fairbanks	Fairbanks, Alaska
Journal article	2017	Blevins-Manhard, Rachael; Atkinson, Shannon; Lammers, Marc	Spatial and temporal patterns in the calling behavior of beluga whales, <i>Delphinapterus leucas</i> , in Cook Inlet, Alaska	Marine Mammal Science		10.1111/mms.12353	http://doi.wiley.com/10.1111/mms.12353		33	1	112-133
Report	2020	Castellote, M.; Stocker, M.; Brewer, A.	Passive acoustic monitoring of cetaceans & noise during Hilcorp 3D seismic survey in Lower Cook Inlet, AK
Report	2014	Worthington, M.	Acoustic Monitoring of Beluga Whale Interactions with Cook Inlet Tidal Energy Project												ORPC Alaska, LLC, Anchorage, AK (United States)
Journal article	2019	Castellote, Manuel; Thayre, Bruce; Mahoney, Michael; Mondragon, Jeffrey; Lammers, Marc O.; Small, Robert J.	Anthropogenic Noise and the Endangered Cook Inlet Beluga Whale, Delphinapterus leucas: Acoustic Considerations for Management	Marine Fisheries Review		10.7755/MFR.80.3.3	https://spo.nmfs.noaa.gov/content/mfr/anthropogenic-noise-and-endangered-cook-inlet-beluga-whale-delphinapterus-leucas		80	3	63-88
Journal article	2020	Mooney, T. Aran; Castellote, Manuel; Jones, Ian; Rouse, Natalie; Rowles, Teri; Mahoney, Barbara; Goertz, Caroline E. C.	Audiogram of a Cook Inlet beluga whale ( <i>Delphinapterus leucas</i> )	The Journal of the Acoustical Society of America		10.1121/10.0002351	http://asa.scitation.org/doi/10.1121/10.0002351		148	5	3141-3148
Journal article	2013	Lammers, Marc O.; Castellote, Manuel; Small, Robert J.; Atkinson, Shannon; Jenniges, Justin; Rosinski, Anne; Oswald, Julie N.; Garner, Chris	Passive acoustic monitoring of Cook Inlet beluga whales ( <i>Delphinapterus leucas</i> )	The Journal of the Acoustical Society of America		10.1121/1.4816575	http://asa.scitation.org/doi/10.1121/1.4816575	The endangered beluga whale (Delphinapterus leucas) population in Cook Inlet, AK faces threats from a variety of anthropogenic factors, including coastal development, oil and gas exploration, vessel traffic, and military activities. To address existing gaps in understanding about the occurrence of belugas in Cook Inlet, a project was developed to use passive acoustic monitoring to document the ye…	134	3	2497-2504
Book section	2012	Hoffman, Christopher A.	Mitigating Impacts of Underwater Noise From Dredging on Beluga Whales in Cook Inlet, Alaska	The Effects of Noise on Aquatic Life	978-1-4419-7310-8 978-1-4419-7311-5		http://link.springer.com/10.1007/978-1-4419-7311-5_140		730		617-619				Springer New York	New York, NY
Journal article	2013	Saxon-Kendall, L.; Sirovic, A.; Roth, E. H.	Effects of construction noise on the Cook Inlet beluga whale (Delphinapterus leucas) vocal behavior	Canadian Acoustics				Cook Inlet beluga whales (Delphinapterus leucas) are listed as endangered under the US Endangered Species Act. Potential threats to this population include anthropogenic noise and coastal zone development. The Port of Anchorage Marine Terminal Redevelopment (MTR) Project, taking place in the Knik Arm of Cook Inlet, Alaska, involves multiple construction activities including dredging, gravel fill …	41	3	2021-03-13
Journal article	2016	Castellote, Manuel; Small, Robert J.; Lammers, Marc O.; Jenniges, Justin J.; Mondragon, Jeff; Atkinson, Shannon	Dual instrument passive acoustic monitoring of belugas in Cook Inlet, Alaska	The Journal of the Acoustical Society of America		10.1121/1.4947427	http://asa.scitation.org/doi/10.1121/1.4947427	As part of a long-term research program, Cook Inlet beluga (Delphinapterus leucas) presence was acoustically monitored with two types of acoustic sensors utilized in tandem in moorings deployed year-round: an ecological acoustic recorder (EAR) and a cetacean and porpoise detector (C-POD). The EAR was used primarily to record the calls, whistles, and buzzes produced by belugas and killer whales (O…	139	5	2697-2707
Journal article	2010	Hotchkin, Cara F.; Parks, Susan E.; Mahoney, Barbara A.	Anthropogenic noise and sound production by beluga whales ( <i>Delphinapterus leucas</i> ) in Cook Inlet, Alaska during early August 2007.	The Journal of the Acoustical Society of America		10.1121/1.3383434	http://asa.scitation.org/doi/10.1121/1.3383434		127	3	1727-1727
Journal article	2017	Small, Rj; Brost, B; Hooten, M; Castellote, M; Mondragon, J	Potential for spatial displacement of Cook Inlet beluga whales by anthropogenic noise in critical habitat	Endangered Species Research		10.3354/esr00786	http://www.int-res.com/abstracts/esr/v32/p43-57/		32		43-57
Journal article	2019	Zhong, Ming; Castellote, Manuel; Dodhia, Rahul; Lavista Ferres, Juan; Keogh, Mandy; Brewer, Arial	Improving passive acoustic monitoring applications to the endangered Cook inlet beluga whale	The Journal of the Acoustical Society of America		10.1121/1.5137736	http://asa.scitation.org/doi/10.1121/1.5137736	A decade after the Cook Inlet beluga was listed as endangered in 2008, its population has shown no signs of recovery. Lack of ecology knowledge limits our understanding of, and ability to manage, potential threats impeding recovery of this declining population. NOAA Fisheries, in partnership with the Alaska Department of Fish and Game, initiated a passive acoustics program in 2017 to monitor belu…	146	4	3089-3089
Journal article	2010	Širović, Ana; Kendall, Lindsey S.	Cook Inlet beluga whale echolocations at the Port of Anchorage expansion.	The Journal of the Acoustical Society of America		10.1121/1.3383435	http://asa.scitation.org/doi/10.1121/1.3383435	Ocean noise levels increase as a result of human activities. As a result, the effects of anthropogenic noise on marine mammals are a growing concern. A genetically distinct population of beluga whales in Cook Inlet was listed as endangered under the Endangered Species Act in 2008. NOAA has identified many potential threats to the Cook Inlet beluga whale population, including coastal development a…	127	3	1727-1727
Journal article	2016	Hatch, Lt; Wahle, Cm; Gedamke, J; Harrison, J; Laws, B; Moore, Se; Stadler, Jh; Van Parijs, Sm	Can you hear me here? Managing acoustic habitat in US waters	Endangered Species Research		10.3354/esr00722	http://www.int-res.com/abstracts/esr/v30/p171-186/	Many marine animals have evolved over millions of years to rely on sound as a fundamental component of their habitat. Over the last century, increasing noise from human activities has significantly affected the quality of underwater acoustic habitats. These changes can lead to reduced ability to detect and interpret environmental cues used to perform critical life functions (e.g. select mates, fi…	30		171-186
Conference paper	2014	Yates*, Mike; Parker, Lisa; Lomac-MacNair, Kate	Seismic operations in a beluga whale habitat, Cook Inlet, Alaska	SEG Technical Program Expanded Abstracts 2014		10.1190/segam2014-0848.1	https://library.seg.org/doi/10.1190/segam2014-0848.1				4501-4505				Society of Exploration Geophysicists	Denver, Colorado
Report	2013	Golde, H. M.	Environmental assessment for issuance of an incidental harassment authorization for the Apache Alaska Corporation 3D seismic survey in Cook Inlet, Alaska				https://repository.library.noaa.gov/view/noaa/4502				137				NOAA Fisheries, NMFS, Alaska Region	Anchorage, AK
Journal article	2007	Tremblay, Sara K.; Anderson, Thomas S.; Pettit, Erin C.; Scheifele, Peter M.; Potty, Gopu R.; Miller, James H.	Ocean acoustic effects of explosions on land: Evaluation of Cook Inlet beluga whale habitability	The Journal of the Acoustical Society of America		10.1121/1.2942716	http://scitation.aip.org/content/asa/journal/jasa/122/5/10.1121/1.2942716	The Eagle River Flats is an impact region for artillery at Fort Richardson, Alaska. Adjacent to the Flats is the Knik Arm of Cook Inlet which is the habitat for a distinct population of beluga whales (Delphinapterus leucas). In order to assess the effects of 155 mm artillery explosions on the habitat of these whales, a series of 6.8 kg C4 plastique charges were detonated on land 500 meters from t…	122	5	3002
Report	2008	Alaska SeaLife Center	Synopsis of Workshop on Passive Acoustic Monitoring of Cook Inlet Belugas: 6 November 2008				https://www.fisheries.noaa.gov/resource/document/synopsis-workshop-passive-acoustic-monitoring-cook-inlet-belugas-6-november-2008	Alaska SeaLife Center, Cetacean Research Program acoustic workshop report			29					Anchorage, AK
Report	2003	Blackwell, S. B.; Greene, Jr., C. E.	ACOUSTIC MEASUREMENTS IN COOK INLET, ALASKA, DURING AUGUST 2001								44				National Marine Fisheries Service, Protected Resources Division	Anchorage, AK
Report	2016	Castellote, M.; Thayre, B.; Mahoney, M.; Mondragon, J.; Schmale, C.; Small, R. J.	Anthropogenic noise in Cook Inlet beluga habitat: sources, acoustic characteristics, and frequency of occurrence					A subsample (8756 hours) of the acoustic recordings collected by the CIBA (Cook Inlet Beluga Acoustics) research program in Cook Inlet, Alaska, from July 2008 to May 2013, were analyzed to describe anthropogenic sources of underwater noise, acoustic characteristics, and frequency of occurrence and evaluate the potential for acoustic impact to Cook Inlet belugas. A total of 13 sources of noise wer…			102			Final Wildlife Research Report	Alaska Department of Fish and Game
Presentation	2009	Hotchkin, C. F.; Parks, S. E.; Mahoney, B. A.	Anthropogenic noise sources and sound production of beluga whales (Delphinapterus leucas) in Cook Inlet, Alaska					Beluga whales (Delphinapterus leucas) in Cook Inlet, Alaska are geographically and genetically isolated from other Alaskan beluga populations, and were listed as endangered in 2008. One potential threat to the recovery of the population is anthropogenic noise, which may disrupt communication and normal behaviors throughout the population's limited range. In order to evaluate this potential proble…								Quebec, Canada
Thesis	2010	Saxon-Kendall, L.	Construction Impacts on the Cook Inlet Beluga Whale (Delphinapterus leucas) at the Port of Anchorage Marine Terminal Redevelopment Project					Cook Inlet beluga whales (Delphinapterus leucas) are geographically isolated and genetically distinct from the other US beluga stocks. They were recently listed as endangered under the US Endangered Species Act. Many factors are identified as potential threats to the Cook Inlet beluga whale population, including coastal zone development and anthropogenic noise. The Port of Anchorage (POA) Marine …				96			Alaska Pacific University	Anchorage, AK
Journal article	2016	Kendall, Lindsey Saxon; Cornick, Leslie A.	Behavior and distribution of Cook Inlet beluga whales, Delphinapterus leucas, before and during pile driving activity	Marine Fisheries Review		10.7755/MFR.77.2.6	http://spo.nmfs.noaa.gov/mfr772/mfr7726.pdf	Five stocks of beluga whales, Delphinapterus leucas, exist in U.S. waters. Cook Inlet beluga whales are genetically distinct and geographically isolated from the other stocks and are listed as endangered under the U.S. Endangered Species Act. Many factors are identifi ed as potential threats to Cook Inlet beluga whales, including coastal zone development and anthropogenic noise. The Port of Ancho…	77	2	106-114
Report	2011	Marine Acoustics, Inc.	Underwater Acoustic Measurement of the Spartan 151 Jack-up Drilling Rig in the Cook Inlet Beluga Whale Critical Habitat					Compliance with underwater noise environmental regulations for offshore drilling rig operations is of increasing concern for the oil industry, especially in designated critical habit areas. Furie Operating Alaska, LLC, began drilling an exploration well in Cook Inlet Basin of Alaska in September 2011 within the newly designated National Marine Fisheries Service critical habitat for beluga whales.…			40				Furie Operating Alaska, LLC	Anchorage, AK
Report	2009	Scientific Fishery Systems, Inc.	PORT OF ANCHORAGE MARINE TERMINAL DEVELOPMENT PROJECT 2008 Underwater Noise Survey During Construction Pile Driving				https://www.fisheries.noaa.gov/resource/document/port-anchorage-marine-terminal-development-project-2008-underwater-noise-survey				231				US DOT, Port of Anchorage, & Integrated Concepts and Research Corporation	Anchorage, AK
Report	2012		Interactions between beluga whales (Delphinapterus leucas) and boats in Knik Arm, upper Cook Inlet, Alaska: Behavior and Bioacoustics				https://www.fisheries.noaa.gov/resource/document/interactions-between-beluga-whales-and-boats-knik-arm-upper-cook-inlet-alaska				28				NOAA Fisheries P.O. AKR-7-020	Anchorage, AK
Report	2007	URS	PORT OF ANCHORAGE MARINE TERMINAL DEVELOPMENT PROJECT UNDERWATER NOISE SURVEY TEST PILE DRIVING PROGRAM ANCHORAGE, ALASKA					To prevent and minimize adverse impacts to marine mammals and to ensure compliance with the Marine Mammal Protection Act (MMPA) and the U.S. Army Corps of Engineers (USACE) Permit Number POA-2003-502-N (August 10, 2007), the Port of Anchorage (POA) and Department of Transportation Maritime Administration was required to conduct underwater noise surveys to measure and evaluate construction noise l…			60			Final Underwater Noise Report	US DOT, Port of Anchorage, & Integrated Concepts and Research Corporation	Anchorage, AK
Report	1995	Waite, J. M.; Hobbs, R. C.; Lerczak, J. A.	FIELD REPORT FOR VESSEL OPERATIONS IN COOK INLET, ALASKA, JULY 1995					The National Marine Mammal Laboratory (NMML) in cooperation with the National Marine Fisheries Service - Alaska Region (NMFS-AKR), Alaska Beluga Whale Commission (ABWC), and the Cook Inlet Marine Mammal Council (CIMMC) conducted population studies on beluga whales in Cook Inlet in the summer of 1995. NMFS-AKR and CIMMC provided boats and personnel, and the ABWC provided funding. The overall objec…			5				National Marine Mammal Laboratory Alaska Fisheries Science Center National Marine Fisheries Service, NOAA	Anchorage, AK
Cook Inlet Beluga -Population Status/Trajectory
Journal article	2020	O’Corry-Crowe, Greg; Suydam, Robert; Quakenbush, Lori; Smith, Thomas G.; Lydersen, Christian; Kovacs, Kit M.; Orr, Jack; Harwood, Lois; Litovka, Dennis; Ferrer, Tatiana	Group structure and kinship in beluga whale societies	Scientific Reports		10.1038/s41598-020-67314-w	http://www.nature.com/articles/s41598-020-67314-w		10	1	11462
Journal article	2003	Shelden, Kim E. W.; Rugh, David J.; Mahoney, BarbaraA.; Dahlheim, Marilyn E.	KILLER WHALE PREDATION ON BELUGAS IN COOK INLET, ALASKA: IMPLICATIONS FOR A DEPLETED POPULATION	Marine Mammal Science		10.1111/j.1748-7692.2003.tb01319.x	http://doi.wiley.com/10.1111/j.1748-7692.2003.tb01319.x	Killer whale predation on belugas in Cook Inlet, Alaska, has become a concern since the decline of these belugas was documented during the 1990s. Accordingly, killer whale sightings were compiled from systematic surveys, observer databases, and anecdotal accounts. Killer whales have been relatively common in lower Cook Inlet (at least 100 sightings from 1975 to 2002), but in the upper Inlet, nort…	19	3	529-544
Journal article	2020	Vos, Daniel J.; Shelden, Kim E. W.; Friday, Nancy A.; Mahoney, Barbara A.	Age and growth analyses for the endangered belugas in Cook Inlet, Alaska	Marine Mammal Science		10.1111/mms.12630	https://onlinelibrary.wiley.com/doi/abs/10.1111/mms.12630	Belugas, I Delphinapterus leucas i , Pallas (1776) are toothed whales of the Monodontidae family which includes only one other species, the narwhal, I Monodon monoceros i . Tooth collection procedures were dependent on when the teeth were collected (protocols changed through the years to include collection of the entire mandible when possible), the length of time the whale was dead, the whale's p…	36	1	293-304
Journal article	2020	Shelden, Kim E. W.; Robeck, Todd R.; Goertz, Caroline E. C.; McGuire, Tamara L.; Burek‐Huntington, Kathleen A.; Vos, Daniel J.; Mahoney, Barbara A.	Breeding and calving seasonality in the endangered Cook Inlet beluga whale population: Application of captive fetal growth curves to fetuses and newborns in the wild	Marine Mammal Science		10.1111/mms.12653	https://onlinelibrary.wiley.com/doi/abs/10.1111/mms.12653		36	2	700-708
Journal article	2020	Jacobson, Eiren K.; Boyd, Charlotte; McGuire, Tamara L.; Shelden, Kim E. W.; Himes Boor, Gina K.; Punt, André E.	Assessing cetacean populations using integrated population models: an example with Cook Inlet beluga whales	Ecological Applications		10.1002/eap.2114	https://onlinelibrary.wiley.com/doi/abs/10.1002/eap.2114	Effective conservation and management of animal populations requires knowledge of abundance and trends. For many species, these quantities are estimated using systematic visual surveys. Additional individual-level data are available for some species. Integrated population modeling (IPM) offers a mechanism for leveraging these data sets into a single estimation framework. IPMs that incorporate bot…	30	5	e02114
Journal article	2020	Norman, Stephanie; Hobbs, Roderick; Beckett, Laurel; Trumble, Stephen; Smith, Woutrina	Relationship between per capita births of Cook Inlet belugas and summer salmon runs: age-structured population modeling	Ecosphere		10.1002/ecs2.2955		Anthropogenic disturbances may alter a population's conservation status if the ability of individuals to survive and breed is affected. We used an adaptation of the Heligman-Pollard model to estimate survival at age of Cook Inlet belugas (CIB; Delphinapterus leucas), an endangered population in south-central Alaska. We developed an age-structured Leslie matrix model, based on the life history par…	11		e02955. 10.1002/ecs2.2955
Presentation	2012	Ezer, Tal	A Study of the environmental and physical factors that influence the movement and survival of beluga whales in Cook Inlet, Alaska				http://www.ccpo.odu.edu/~tezer/PAPERS/2012_AlaskaSymp_Beluga.pdf	The population of the endangered Cook Inlet Beluga Whales (CIBW), has been in decline over the past decades and no convincing explanation has been offered so far for this trend. Various environmental and hydrodynamic factors that may impact the belugas’ movement and survival are analyzed. Satellite tracking of the beluga movements over a 5-year period is compared with local data such as river run…								Anchorage, AK
Journal article	2007	Markowitz, Tim M; McGuire, Tamara L	Beluga whale grouping, behavior, and movements near the Port of Anchorage	Temporal-spatial distribution, movements and behavior of beluga whales near the Port of Anchorage, Alaska							27
Journal article	2014	Allen, B M; Helker, V. T.; Jemison, L. A.	Human-caused Injury and Mortalityof NMFS-Managed Alaska Marine Mammal Stocks, 2007-2011	NOAA Technical Memorandum NMFS				The National Marine Fisheries Service (NMFS) is required under the Marine Mammal Protection Act (MMPA) to estimate the annual human-caused mortality and serious injury of marine mammal stocks by source. Revisions to the guidelines and process the NMFS uses for distinguishing serious from non-serious injuries pursuant to the MMPA were implemented in 2013 and applied to the most recent 5 years (200…			93
Journal article	2005	Vos, Daniel J.; Shelden, Kim E W.	UNUSUAL MORTALITY IN THE DEPLETED COOK INLET BELUGA (DELPHINAPTERUS LEUCAS) POPULATION	Northwestern Naturalist		10.1898/1051-1733(2005)086[0059:UMITDC]2.0.CO;2	http://www.bioone.org/doi/abs/10.1898/1051-1733%282005%29086%5B0059%3AUMITDC%5D2.0.CO%3B2		86	2	59-65
Report	2019	Shelden, K. E. W.; Wade, P. R.	Aerial surveys, distribution, abundance, and trend of belugas (Delphinapterus leucas) in Cook Inlet, Alaska, June 2018				https://apps-afsc.fisheries.noaa.gov/documents/PR2019-09.pdf	The National Marine Fisheries Service (NMFS) has conducted aerial surveys to estimate abundance of the beluga population in Cook Inlet, Alaska, each June, July, or both from 1993 to 2012, after which biennial surveys began in 2014. The current document presents survey results and subsequent analyses yielding an abundance estimate and population trend based on data collected during June 2018.			93				NOAA Fisheries, National Marine Fisheries Service, Seattle, WA	Seattle, WA
Report	2017	Shelden, Kim E. W.; Hobbs, Roderick C.; Sims, Christy L.; Vate Brattström, Linda; Mocklin, Julie A.; Boyd, Charlotte; Mahoney, Barbara A.	Aerial surveys, abundance, and distribution of Beluga whales (Delphinapterus leucas) in Cook Inlet, Alaska, June 2016.				https://repository.library.noaa.gov/view/noaa/14803				62			AFSC Processed Report	NOAA Fisheries, National Marine Fisheries Service, Seattle, WA
Report	2015	Shelden, K. E. W.; Sims, C.; Vate Brattström, L.; Goetz, K. T.; Hobbs, R. C.	Aerial surveys of beluga whales (Delphinapterus leucas) in Cook Inlet, Alaska, June 2014				https://repository.library.noaa.gov/view/noaa/5307				55			AFSC Processed Report	NOAA Fisheries, National Marine Fisheries Service, Seattle, WA	Seattle, WA
Journal article	2020	McGuire, Tamara L.; Stephens, Amber D.; McClung, John R.; Garner, Christopher D.; Shelden, Kim E. W.; Boor, Gina K. Himes; Wright, Bruce	Reproductive natural history of endangered Cook Inlet Beluga whales: insights from a long-term photo-identification study	Polar Biology		10.1007/s00300-020-02750-y	http://link.springer.com/10.1007/s00300-020-02750-y	Beluga whales (Delphinapterus leucas) occur broadly throughout the polar and subpolar regions of the Northern Hemisphere, and as a whole, the species is of low conservation concern. However, some populations, including Alaska's Cook Inlet beluga whales (CIBW), are in decline for reasons that remain poorly understood. Currently, information on population-specific reproductive parameters of CIBW is…	43	11	1851-1871
Journal article	2015	Burek-Huntington, Ka; Dushane, Jl; Goertz, Cec; Measures, L. H; Romero, C.; Raverty, Sa	Morbidity and mortality in stranded Cook Inlet beluga whales Delphinapterus leucas	Diseases of Aquatic Organisms		10.3354/dao02839	http://www.int-res.com/abstracts/dao/v114/n1/p45-60/	The endangered Cook Inlet (Alaska, USA) stock of beluga whales Delphinapterus leucas declined 47% between 1994 and 1998, from an estimated 653 whales to 347 whales, with a continued decline to approximately 312 in 2012. Between 1998 and 2013, 164 known dead strandings were reported by the National Marine Fisheries Service. Only 38 of these animals, or 23% of the known stranded carcasses, were nec…	114	1	45-60
Journal article	2019	Boyd, Charlotte; Hobbs, Roderick C.; Punt, André E.; Shelden, Kim E. W.; Sims, Christy L.; Wade, Paul R.	Bayesian estimation of group sizes for a coastal cetacean using aerial survey data	Marine Mammal Science		10.1111/mms.12592	https://onlinelibrary.wiley.com/doi/abs/10.1111/mms.12592	Many small cetacean, sirenian, and pinniped species aggregate in groups of large or variable size. Accurate estimation of group sizes is essential for estimating the abundance and distribution of these species, but is challenging as individuals are highly mobile and only partially visible. We developed a Bayesian approach for estimating group sizes using wide‐angle aerial photographic or video im…	35	4	1322-1346
Report	2005	Rugh, D. J.; Shelden, K. E. W.; Sims, C.; Mahoney, B. A.; Smith, B. K.; Litzky, L. K.; Hobbs, R. C.	Aerial surveys of belugas in cook inlet, Alaska, June 2001, 2002, 2003, and 2004					[unedited] The National Marine Fisheries Service (NMFS) has conducted aerial surveys of the beluga population in Cook Inlet, Alaska, each June and/or July since 1993. Results from 1993 to 2000 were published in Rugh et al. (2000a). The current document is a collection of field reports for the subsequent years, from 2001 to 2004. Surveys were done 5-12 June 2001 (55 flight hours; 29.3 hours good e…							NOAA Fisheries, National Marine Fisheries Service, Seattle, WA
Report	2004	Rugh, D. J.; Mahoney, B. A.; Smith, B. K.	Aerial surveys of beluga whales in cook inlet, Alaska, between June 2001 and June 2002					[unedited] The National Marine Fisheries Service (NMFS) conducted aerial surveys of the beluga whale (Delphinapterus leucas) population in Cook Inlet, Alaska, almost monthly between June 2001 and June 2002. The surveys were flown in a twin-engine, high-wing aircraft at an altitude of 244 m (800 ft) and speed of 185 km/hour (100 kt). Tracklines were approximately 1.4 km offshore, and systematic tr…							NOAA Fisheries, National Marine Fisheries Service, Seattle, WA
Journal article	2006	NOAA Fisheries	Cook Inlet beluga whale population maintains numbers	Marine Pollution Bulletin					52	3	245-245
document	2008	Shelden, K. E. W.; Rugh, D. J.; Goetz, K. T.; Vate Brattström, L.; Mahoney, B. A.	Aerial surveys of belugas in Cook Inlet, Alaska, June 2008				https://repository.library.noaa.gov/view/noaa/17321								National Oceanic and Atmospheric Administration, National Marine Fisheries …
Report	2013	Shelden, K. E. W.; Rugh, D. J.; Goetz, K. T.; Sims, C.; Vate Brattström, L.; Mocklin, J. A.; Mahoney, B. A.; Smith, B. K.; Hobbs, R. C.	Aerial Surveys of Beluga Whales, Delphinapterus leucas, in Cook Inlet, Alaska, June 2005 to 2012				https://repository.library.noaa.gov/view/noaa/4581	The National Marine Fisheries Service (NMFS) has conducted aerial surveys of the beluga population in Cook Inlet, Alaska, each June and/or July since 1993. Results from 1993 to 2000 and 2001 to 2004 were published previously. The current document is a compilation of data from field reports for the subsequent years, from 2005 to 2012. Surveys during these year occurred 31 May-9 June 2005 (54.5 fli…			131
document	2000	Rugh, D. J.; Shelden, K. E. W.; Mahoney, B. A.; Litzky, L. K.; Hobbs, R. C.; Laidre, K. L.	Aerial surveys of beluga whales in Cook Inlet, Alaska, June 1999												Unpubl. Doc. Natl. Mar. Mammal Lab., NMFS, NOAA
Report	2016	Shelden, Kim E. W.; Mahoney, Barbara A.	Aerial surveys of beluga whales in Cook Inlet, Alaska, June 1991.				https://repository.library.noaa.gov/view/noaa/8690	During 18-21 June 1991, aerial surveys were flown to document the distribution and group sizes of beluga whales, Delphinapterus leucas, in Cook Inlet, Alaska. The original data from these surveys were thought to be lost. The only description of these surveys, a short summary and single map (NMFS 1992:7-9), exists within an unpublished document (titled: 'Status Report on Cook Inlet Belugas (Delphi…			22
document	1996	Rugh, D. J.; Shelden, K. E. W.; Angliss, R. P.; DeMaster, D. P.; Mahoney, B. A.	Aerial surveys of beluga whales in Cook Inlet, Alaska, July 1995												Unpubl. Doc. Natl. Mar. Mammal Lab., NMFS, NOAA
document	2002	Rugh, D. J.; Goetz, K. T.; Mocklin, J. A.; Mahoney, B. A.; Smith, B. K.	Aerial surveys of beluga in Cook Inlet, Alaska, June 2002												Unpubl. Doc. Natl. Mar. Mammal Lab., NMFS, NOAA
document	2006	Rugh, D. J.; Goetz, K. T.; Sims, C.	Aerial Survey of Belugas in Cook Inlet Alaska May 2006												Unpubl. Doc. Natl. Mar. Mammal Lab., NMFS, NOAA
document	2012	Sims, C.; Vate Brattström, L.; Goetz, K. T.	Aerial Survey of Belugas in Cook Inlet Alaska August 2012												Unpubl. Doc. Natl. Mar. Mammal Lab., NMFS, NOAA
document	2010	Shelden, K. E. W.; Vate Brattström, L.; Sims, C.	Aerial Survey of Belugas in Cook Inlet Alaska August 2010												Unpubl. Doc. Natl. Mar. Mammal Lab., NMFS, NOAA
document	2006	Rugh, D. J.; Goetz, K. T.; Sims, C.; Smith, B. K.	Aerial Survey of Belugas in Cook Inlet Alaska August 2006												Unpubl. Doc. Natl. Mar. Mammal Lab., NMFS, NOAA
Journal article	2016	Hobbs, Roderick C.; Wade, Paul R.; Shelden, Kim E. W.	Viability of a small, geographically-isolated population of beluga whale, Delphinapterus leucas: effects of hunting, predation, and mortality events in Cook Inlet, Alaska	Marine Fisheries Review		10.7755/MFR.77.2.4	http://spo.nmfs.noaa.gov/mfr772/mfr7724.pdf	A genetically distinct population of beluga whales, Delphinapterus leucas, in Cook Inlet, Alaska, displays strong site fi delity to the inlet year-round. A population viability analysis (PVA) model was developed to evaluate this population’s risk of extinction and decline over 50 and 100 years. Model assumptions and parameter sensitivity were tested by varying survival and fecundity rates, freque…	77	2	59-88
Report	2017	Shelden, K. E. W.; Migura, M.	5-YEAR REVIEW Beluga whale (Cook Inlet DPS)/Delphinapterus leucas				https://repository.library.noaa.gov/view/noaa/17047	The first draft of the 5-year review was completed at the Marine Mammal Laboratory (MML), referencing criteria and recovery actions provided in the 2015 Draft Recovery Plan for the Cook Inlet Beluga Whale (Delphinapterus leucas), and papers published since release of the Draft Recovery Plan in May 2015. Upon finalization of the Recovery Plan in December 2016, this document was updated to reflect …			32				NOAA Fisheries, National Marine Fisheries Service, Seattle, WA	Seattle, WA
Report	2009	Angliss, R. P.; Allen, B. M.; Wade, P. R.; Perez, M. A.; Clapham, P. J.; Fritz, L. W.; Rugh, D. J.; Shelden, K. E. W.; Hobbs, R. C.; Towell, R. G.; Mizroch, S. A.; Zerbini, A. N.	Alaska marine mammal stock assessments, 2008.				https://repository.library.noaa.gov/view/noaa/14910				269				NOAA Fisheries, National Marine Fisheries Service, Seattle, WA	Seattle, WA
Report	2015	Allen, B. M.; Angliss, R. P.	Alaska marine mammal stock assessments, 2014.				https://repository.library.noaa.gov/view/noaa/4945				313				NOAA Fisheries, National Marine Fisheries Service, Seattle, WA	Seattle, WA
Report	2020	Muto, M. M.; Helker, V. T.; Delean, B. J.; Angliss, R. P.; Boveng, P. L.; Breiwick, J. M.; Brost, B. M.; Cameron, M. F.; Clapham, P. J.; Dahle, S. P.	Alaska Marine Mammal Stock Assessments, 2019				https://media.fisheries.noaa.gov/dam-migration/2019_sars_alaska_508.pdf				404				NOAA Fisheries, National Marine Fisheries Service, Seattle, WA	Seattle, WA
Report	1999	Hill, P. S.; DeMaster, D. P.	Alaska marine mammal stock assessments, 1999								110				US Department of Commerce, National Oceanic and Atmospheric Administration …	Seattle, WA
Report	2000	Ferrero, R. C.; DeMaster, D. P.; Hill, P. S.; Muto, M. M.; Lopez, A. L.; Brix, K.	Alaska marine mammal stock assessments, 2000												NOAA Fisheries, National Marine Fisheries Service, Seattle, WA	Seattle, WA
Report	2012	Hobbs, R. C.; Sims, C.; Shelden, K. E. W.	Estimated abundance of belugas in Cook Inlet, Alaska, from aerial surveys conducted in June 2012				http://citeseerx.ist.psu.edu/viewdoc/download?doi=10.1.1.297.7509&rep=rep1&type=pdf				7				NOAA Fisheries, National Marine Fisheries Service, Seattle, WA	Seattle, WA
Report	2009	Hobbs, R. C.; Sims, C.; Shelden, K. E. W.; Rugh, D. J.	Estimated abundance of beluga whales in Cook Inlet, Alaska, from aerial surveys conducted in June 2009					The National Marine Fisheries Service (NMFS) conducted aerial surveys of the beluga population in Cook Inlet, Alaska, 2-9 June 2009 as a continuum of surveys conducted since 1993. Five of the days in 2009 resulted in complete surveys of the beluga habitat in the upper inlet (north of East Foreland and West Foreland); and the remaining three days included surveys of the lower inlet and a compulsor…							NOAA Fisheries, National Marine Fisheries Service, Seattle, WA	Seattle, WA
Journal article	2016	Lomac-MacNair, Kate S.; Smultea, Mari A.; Cotter, Mark P.; Thissen, Carey; Parker, Lisa	Socio-sexual and probable mating behavior of Cook Inlet beluga whales, Delphinapterus leucas, observed from an aircraft	Marine Fisheries Review		10.7755/MFR.77.2.2	http://spo.nmfs.noaa.gov/mfr772/mfr7722.pdf		77	2	32-39
Report	2013	Hobbs, R. C.	Detecting Changes in Population Trends for Cook Inlet Beluga whales (Delphinapterus leucas) Using Alternative Schedules for Aerial Surveys								36				NOAA Fisheries, National Marine Fisheries Service, Seattle, WA
Journal article	2000	Hobbs, R. C.; Rugh, D. J.; DeMaster, D. P.	Abundance of Belugas, Delphinapterus leucas, in Cook Inlet, Alaska, 1994–2000	Mar Fish Rev			https://spo.nmfs.noaa.gov/content/abundance-belugas-delphinapterus-leucas-cook-inlet-alaska-1994-2000	Annual abundance estimates of belugas, Delphinapterus leucas, in Cook Inlet were calculated from counts made by aerial observers and aerial video recordings. Whale group-size estimates were corrected for subsurface whales (availability bias) and whales that were at the surface but were missed (detection bias). Logistic regression was used to estimate the probability that entire groups were missed…	62	3	37-45
Journal article	2000	Hobbs, R. C.; Waite, J. M.; Rugh, D. J.	Beluga, Delphinapterus leucas, Group Sizes in Cook Inlet, Alaska, Based on Observer Counts and Aerial Video	Mar Fish Rev			http://spo.nwr.noaa.gov/mfr623/mfr6236.pdf	Beluga, Delphinap terus leu -knowing the average whale image size cas, groups were videotaped concurrent in the videotapes. Image sizes were meato observer counts during annual NMFS sured for 2,775 whales from 275 different aerial surveys of Cook Inlet, Alaska, from passes over whale groups. Corrected group 1994 to 2000. The videotapes provided per-sizes were calculated as the product of the mane…	62	3	46-59
Journal article	2016	Hobbs, Roderick C.; Sims, Christy L.; Shelden, Kim E. W.; Brattstrom, Linda Vate; Rugh, David J.	Annual calf indices for beluga whales, Delphinapterus leucas, in Cook Inlet Alaska, 2006-12	Marine Fisheries Review		10.7755/MFR.77.2.3	http://spo.nmfs.noaa.gov/mfr772/mfr7723.pdf	Beluga whales, Delphinapterus leucas, in Cook Inlet, Alaska, form an isolated, depleted population that is now listed as endangered. Calving rates are an indicator of population health and the potential for recovery. Most births in Alaska beluga whale populations occur by late July; therefore, systematic aerial surveys were conducted in August covering primary habitat in upper Cook Inlet and comp…	77	2	40-58
Journal article	2015	Hobbs, Roderick C.; Rugh, David J.; Sims, Christy L; Waite, Janice M.; Shelden, Kim E. W.	Estimated abundance and trend in aerial counts of beluga whales, Delphinapterus leucas, in Cook Inlet, Alaska, 1994-2012	Marine Fisheries Review		10.7755/MFR.77.1.2	http://spo.nmfs.noaa.gov/mfr771/mfr7712.pdf	Aerial surveys of beluga whales, Delphinapterus leucas, have been conducted annually in Cook Inlet, Alaska, from 1993 to 2012. Beluga whales were seen near the coast and within river mouths in all years, with nearly all of the sightings in the northernmost portions of the inlet after 2000. In this paper, we revisit abundance estimates from 1994 to 2012 and present changes in methods and statistic…	77	1	1931-11-01
Thesis	2001	Litzky, L. K.	Monitoring Recovery Status and Age Structure of Cook Inlet, Alaska Belugas by Skin Color Determination					The Cook Inlet stock of belugas (Delphinapterus leucas) is the most isolated of five evident populations around Alaska. Declines in abundance of this stock, apparently from over harvest, have been detected since 1993. This study describes a technique developed to monitor the conservation status of the Cook Inlet stock. Belugas are gray at birth and gradually lighten with maturity. Thus, the fract…				80			University of Washington	Seattle, WA
Report	2011	Matkin, C. O.; Lennard, L. B.; Andrews, R.; Durban, J.	Predation by Killer Whales in Cook Inlet and Western Alaska: An Integrated Approach 2008-2009 Project R0303-01 Final Report – Revised April 2011				https://www.fisheries.noaa.gov/resource/document/predation-killer-whales-cook-inlet-and-western-alaska-integrated-approach-2008	Killer whales are listed as a possible factor in the lack of recovery of the endangered Cook Inlet beluga whales and have been suggested as agents in the decline of other marine mammal species as well. In this study we develop research methodologies in False Pass/Unimak Island, Alaska and initiate pilot work photodocumenting individuals and observing feeding ecology of killer whales entering Cook…			16					Anchorage, AK
Report	1999	Moore, S. E.	Synthesis of available information on the Cook Inlet stock of beluga whales.				https://www.fisheries.noaa.gov/resource/document/synthesis-available-information-cook-inlet-stock-beluga-whales	On 19 November 1998, the National Marine Fisheries Service initiated a status review of the Cook Inlet beluga whale (Delphinapterus leucas) stock to determine whether designation under the Marine Mammal Protection Act or a change in listing classification under the U.S. Endangered Species Act was warranted (63 Federal Register page 64229; 19 Nov. 1998). The National Marine Fisheries Service under…			26				Alaska Fish. Sci. Cent., Natl. Mar. Fish. Serv., NOAA	Seattle, WA
Journal article	2000	Rugh, D. J.; Shelden, K. E. W.; Mahoney, B. A.	Distribution of Belugas, Delphinapterus leucas, in Cook Inlet, Alaska, During June/July 1993–2000	Mar Fish Rev				Aerial surveys of belugas, Delphinapterus leucas, in Cook Inlet wre flown each year during June and/or July from 1993 to 2000. This project was designed to delineate distribution and collect aerial counts, elements critical to the managment of this small, isolated stock that was subjected to a persistent harvest by Native hunters. The surveys provided a thorough, annual coverage of the coastal ar…	62	3	2021-06-21
Journal article	2020	Shelden, Kim E. W.; Burns, John J.; McGuire, Tamara L.; Burek‐Huntington, Kathleen A.; Vos, Daniel J.; Goertz, Caroline E. C.; O'Corry‐Crowe, Gregory; Mahoney, Barbara A.	Reproductive status of female beluga whales from the endangered Cook Inlet population	Marine Mammal Science		10.1111/mms.12648	https://onlinelibrary.wiley.com/doi/abs/10.1111/mms.12648	The Cook Inlet population (hereafter CIB) of beluga whales ( I Delphinapterus leucas i ) is a discrete and genetically distinct stock (O'Corry-Crowe, Suydam, Rosenberg, Frost, & Dizon, [24]) that is geographically isolated from other beluga stocks in Alaska (Laidre, Shelden, Rugh, & Mahoney, [15]). Ovary weights (in grams) and number of corpora lutea (CLs) and corpora albicantia (CAs) found in ea…	36	2	690-699
Thesis	2003	Vos, D. J.	COOK INLET BELUGA AGE AND GROWTH				https://www.fisheries.noaa.gov/resource/document/cook-inlet-beluga-age-and-growth	The Cook Inlet beluga population declined 47% from 1994 to 1998. This decline has highlighted the need to gather and understand basic life history information of the population. Teeth from harvested and stranded Cook Inlet belugas, collected from 1992 to 2001, were used to establish growth layer group (GLG)/length curves for female and male Cook Inlet belugas. A total of 372 teeth from 58 whales …				77			Alaska Pacific University	Anchorage, AK
Cook Inlet Beluga - Reduced prey
Conference paper	2011	Castellote, M; McGuire, T; McKee, C; Lammers, MO	Can we hear Cook Inlet beluga whales feeding
Report	2011	Austin, John K; Birch, Wesley D; FitzGerald, Cay; Godden, Ellen; Gomez, Catrina D; Gordon, Heather; Jimenez, Joseph A; Laughlin, Claudia; Regotti, Kristi; LaSalle, Deborah L	F-22 Plus-Up Environmental Assessment Joint Base Elmendorf-Richardson, Alaska					This EA has been prepared in accordance with the National Environmental Policy Act (NEPA). The analysis focused on the following environmental resources: airspace management and air traffic control, noise, safety, air quality hazardous materials and waste management, biological resources, cultural resources, land use, socioeconomics, and environmental justice. Airspace management would not be imp…			327				SCIENCE APPLICATIONS INC MCLEAN VA	Anchorage, AK
Journal article	2014	Fowler, Charles Winsor; Luis, SM	We are not asking management questions	NOAA Technical Memorandum NMFS-F			http://www.afsc.noaa.gov/Publications/AFSC-TM/NOAA-TM-AFSC-267.pdf	In today’s world, humans face a myriad of serious problems. These problems are exemplified by the risks associated with the ongoing extinction crisis (including the risk of our own extinction), global climate change, oceanic acidification, overfishing, pollution, pandemics, and full-scale state-change in the biosphere. Our actions are, in varying ways, and to various degrees, contributing to such…			57
Report	2003	Willette, M.; DeCino, R.; Gove, N.	Mark-Recapture Population Estimates of Coho, Pink, and Chum Salmon Runs to Upper Cook Inlet					This project estimated the total population sizes, escapements, and exploitation rates for coho, pink, and chum salmon returning to Upper Cook Inlet (UCI) in 2002 as a first step toward determining escapement levels needed to achieve sustained yields for these species. Mark-recapture techniques were used to estimate the total population sizes for each species returning to UCI as a whole. Salmon w…			67				Alaska Department of Fish and Game	Anchorage, AK
Journal article	2018	Nelson, Ma; Quakenbush, Lt; Mahoney, Ba; Taras, Bd; Wooller, Mj	Fifty years of Cook Inlet beluga whale feeding ecology from isotopes in bone and teeth	Endangered Species Research		10.3354/esr00890	https://www.int-res.com/abstracts/esr/v36/p77-87/	Beluga whales Delphinapterus leucas that reside in Cook Inlet (CIBW) are important to coastal Alaska Native culture and subsistence, tourism, and ecologically as a top-level predator. Due to a ~50% population decline in the 1990s, the distinct population segment in Cook Inlet was designated depleted under the Marine Mammal Protection Act in 2000 and listed as endangered under the Endangered Speci…	36		77-87
Report	2014	Saupe, S.; Willette, M.; Wetzel, D.; Reynolds, J.	Assessment of the Prey Availability and Oil-related Contaminants in Winter Habitat of Cook Inlet Beluga Whales				https://www.fisheries.noaa.gov/resource/document/assessment-prey-availability-and-oil-related-contaminants-winter-habitat-cook	In 2011, Cook Inlet Regional Citizens Advisory Council (RCAC) submitted a proposal to the Kenai Peninsula Borough (KPB) to address categories of research needs expressed by the Cook Inlet Beluga Whale Conservation Plan (NMFS 2008), as well as in the KPB Cook Inlet Beluga Whale Research Study guidance documents in their call for proposals. The intent of those initiatives was to identify potential …			63			Final Report: Trawl Surveys and Laboratory Analyses (2012-2013)	The Kenai Peninsula Borough	Soldotna, AK
Presentation	2010	Nelson, M. A.; Quakenbush, L. T.	Cook Inlet Beluga Whale Diet Using Stable Isotope Analysis				https://www.fisheries.noaa.gov/resource/document/cook-inlet-beluga-whale-diet-using-stable-isotope-analysis									Anchorage, AK
Thesis	2009	Smith, H. R.	Fatty acid variation in beluga (Delphinapterus leucas) blubber: implications for estimating diet using fatty acids									122			University of Washington	Seattle, WA
Journal article	2015	Quakenbush, Lori T.; Suydam, Robert S.; Brown, Anna L.; Lowry, Lloyd F.; Frost, Kathryn J.; Mahoney, Barbara A.	Diet of beluga whales, Delphinapterus leucas, in Alaska from stomach contents, March-November	Marine Fisheries Review		10.7755/MFR.77.1.7	http://spo.nmfs.noaa.gov/mfr771/mfr7717.pdf		77	1	70-84
Cook Inlet Beluga - Stress/Disease
Conference paper	2011	McGuire, Tamara; Goertz, Caroline EC	Evaluation of Disease and Trauma in Cook Inlet Beluga Whales (Delphinapterus leucas) from Marks Seen in Photographs IAAAM 2011													Las Vegas, Nevada
Conference paper	2020	Van Cise, Amy	Through the looking glass: Using epidermal microbiomes to peer into the health of Bristol Bay and Cook Inlet beluga whales												Agu
Journal article	2018	Shelden, Kim EW; Hobbs, Roderick C; Goetz, Kimberly T; Hoberecht, LK; Laidre, Kristin L; McGuire, TL; Mahoney, Barbara A; Norman, SA; O'Corry-Crowe, G; Vos, DJ	Beluga whale, Delphinapterus leucas, satellite-tagging and health assessments in Cook Inlet, Alaska, 1999 to 2002
Journal article	2020	McGuire, Tamara L.; Shelden, Kim E. W.; Himes Boor, Gina K.; Stephens, Amber D.; McClung, John R.; Garner, Christopher; Goertz, Caroline E. C.; Burek‐Huntington, Kathleen A.; O'Corry‐Crowe, Greg; Wright, Bruce	Patterns of mortality in endangered Cook Inlet beluga whales: Insights from pairing a long‐term photo‐identification study with stranding records	Marine Mammal Science		10.1111/mms.12766	https://onlinelibrary.wiley.com/doi/10.1111/mms.12766	Mortality is a demographic metric crucial for understanding the dynamics of endangered populations such as Cook Inlet beluga whales (CIBWs, Delphinapterus leucas), but patterns of mortality are currently not well understood for CIBWs, making decisions about recovery actions challenging. We combined long-term photo-ID data from approximately 420 individual belugas identified during the period 2005…			mms.12766
document	2019	Dushane, J.; Ziccardi, M.; Wright, S. K.; Wilkin, S. M.; Migura, M.; Rowles, T.	NOAA Fisheries Marine Mammal Health and Stranding Response Program-Cook Inlet & Kodiak Marine Mammal Disaster Response Guidelines				https://www.fisheries.noaa.gov/resource/document/cook-inlet-kodiak-marine-mammal-disaster-response-guidelines-and-appendices	The Cook Inlet and Kodiak Marine Mammal Disaster Response Guidelines (CIKMMDRG) build upon the National Guidelines, incorporate information from the National Contingency Plan (NCP), National Response Framework (NRF), State of Alaska Emergency Operations Plan (AKEOP) and expand upon the Alaska Regional Contingency Plan Annex G, Wildlife Protection Guidelines. Specifically, they address disaster re…							NOAA Fisheries, NMFS, Alaska Region
Journal article	2020	Van Cise, Amy M.; Wade, Paul R.; Goertz, Caroline E. C.; Burek-Huntington, Kathy; Parsons, Kim M.; Clauss, Tonya; Hobbs, Roderick C.; Apprill, Amy	Skin microbiome of beluga whales: spatial, temporal, and health-related dynamics	Animal Microbiome		10.1186/s42523-020-00057-1	https://animalmicrobiome.biomedcentral.com/articles/10.1186/s42523-020-00057-1	Abstract Background Host-specific microbiomes play an important role in individual health and ecology; in marine mammals, epidermal microbiomes may be a protective barrier between the host and its aqueous environment. Understanding these epidermal-associated microbial communities, and their ecological- or health-driven variability, is the first step toward developing health indices for rapid asse…	2	1	39
Journal article	2018	Rouse, Natalie; Burek-Huntington, Kathy A.; Shelden, Kim E. W.	Asphyxiation of an Endangered Cook Inlet Beluga Whale, Delphinapterus leucas	Marine Fisheries Review		10.7755/MFR.79.2.3	https://spo.nmfs.noaa.gov/content/mfr/asphyxiation-endangered-cook-inlet-beluga-whale-delphinapterus-leucas	—The isolated population of Cook Inlet beluga whales, Delphinapterus leucas, is endangered under the U.S. Endangered Species Act (ESA). They reside year-round in the Cook Inlet tidal estuary in southcentral Alaska, near Anchorage. Due to their ESA status, information on causes of mortality are important. A dead beluga was reported in Turnagain Arm, Cook Inlet, on 7 Oct. 2013, and a necropsy was p…	79	2	38-43
Report	2013	Dushane, J.	Cook Inlet Beluga Strandings 1987-­‐2012 Description and Retrospective Analysis of Level A Data				https://www.fisheries.noaa.gov/resource/document/cook-inlet-beluga-strandings-1987-2012-description-and-retrospective-analysis				114				The Kenai Peninsula Borough	Anchorage, AK
Report	2014	McGuire, T.; Stephens, A.	Report of a Workshop on Cook Inlet Beluga Whale Biopsy					The National Marine Fisheries Service (NMFS) is considering expanding the research program for the endangered Cook Inlet beluga whales (CIBW) to include collecting biopsies. Based on recommendations from the Marine Mammal Commission (MMC), the Alaska Department of Fish and Game (ADF&G), the CIBW Recovery Team and others, the NMFS Alaska Region (AKR) sponsored a CIBW Biopsy Workshop to gather expe…			250				Pacific States Marine Fisheri es Commission and National Marine Fisheries Service, Alaska Region, Office of Protected Resources	Anchorage, AK
Report	2009	NMFS, NOAA, AK Regional Office	Cook Inlet Beluga Whale Stranding Response Plan				https://www.fisheries.noaa.gov/resource/document/cook-inlet-beluga-whale-stranding-response-plan				52				NOAA Fisheries Service Alaska Region Division of Protection Resources	Anchorage, AK
St. Lawrence Beluga - Climate change/Anthropogenic
Journal article	1994	Blane, Jean M.; Jaakson, Reiner	The Impact of Ecotourism Boats on the St Lawrence Beluga Whales	Environmental Conservation		10.1017/S0376892900033282	https://www.cambridge.org/core/product/identifier/S0376892900033282/type/journal_article		21	3	267-269
Report	2010	Mosnier, A.; Lesage, V.; Gosselin, J.-F.; Lemieux Lefebvre, S.; Hammill, M.O.; Doniol-Valcroze, T.	Information relevant to the documentation of habitat use by St. Lawrence beluga (Delphinapterus leucas), and quantification of habitat quality				https://waves-vagues.dfo-mpo.gc.ca/Library/339783.pdf	The current population size and distribution range of St. Lawrence beluga are a fraction of those used historically. Their core distribution is centered on the Saguenay River, and is now located between the Battures-aux-Loups-Marins and Rivière-Portneuf / Rimouski in the Estuary, and Baie Ste-Marguerite in the Saguenay River. Concentration areas outside of this sector vary seasonally, as they did…			39				Department of Fisheries and Oceans Canada
Report	2014	Ménard, N.; Michaud, R.; Chion, C.; Turgeon, S.	Documentation of maritime traffic and navigational interactions with St. Lawrence Estuary beluga (Delphinaterus leucas) in calving areas between 2003 and 2012				https://waves-vagues.dfo-mpo.gc.ca/Library/360873.pdf	Anthropogenic disturbance resulting from navigation is considered a current threat to the recovery of the St. Lawrence Estuary (SLE) beluga population, in addition to contaminants, changes in abundance and type of prey as well as habitat degradation (DFO 2012). Many hypotheses, including anthropogenic disturbance, were proposed in attempts to explain the increase in number of calf carcasses found…			29			Canadian Science Advisory Secretariat Science Advisory Report	Department of Fisheries and Oceans Canada	Ottawa
Journal article	2018	Lemieux Lefebvre, S.; Lesage, V.; Michaud, R.; Humphries, M.M.	Classifying and combining herd surface activities and individual dive profiles to identify summer behaviours of beluga ( <i>Delphinapterus</i> <i>leucas</i> ) from the St. Lawrence Estuary, Canada	Canadian Journal of Zoology		10.1139/cjz-2017-0015	http://www.nrcresearchpress.com/doi/10.1139/cjz-2017-0015	Studies of the behaviour of diving animals usually focus on either individual dives or surface group activities, but these complementary observations are seldom combined in the same study. We here study the summer (June–October) behaviour of St. Lawrence Estuary belugas (Delphinapterus leucas (Pallas, 1776)) by combining fine-scale individual diving data from 27 time–depth–speed recorder deployme…	96	5	393-410
Journal article	2011	McQuinn, Ian H.; Lesage, Véronique; Carrier, Dominic; Larrivée, Geneviève; Samson, Yves; Chartrand, Sylvain; Michaud, Robert; Theriault, James	A threatened beluga ( <i>Delphinapterus leucas</i> ) population in the traffic lane: Vessel-generated noise characteristics of the Saguenay-St. Lawrence Marine Park, Canada	The Journal of the Acoustical Society of America		10.1121/1.3658449	http://asa.scitation.org/doi/10.1121/1.3658449	The threatened resident beluga population of the St. Lawrence Estuary shares the Saguenay-St. Lawrence Marine Park with significant anthropogenic noise sources, including marine commercial traffic and a well-established, vessel-based whale-watching industry. Frequency-dependent (FD) weighting was used to approximate beluga hearing sensitivity to determine how noise exposure varied in time and spa…	130	6	3661-3673
Journal article	2011	Parrott, L.; Chion, C.; Martins, C.C.A.; Lamontagne, P.; Turgeon, S.; Landry, J.A.; Zhens, B.; Marceau, D.J.; Michaud, R.; Cantin, G.; Ménard, N.; Dionne, S.	A decision support system to assist the sustainable management of navigation activities in the St. Lawrence River Estuary, Canada	Environmental Modelling & Software		10.1016/j.envsoft.2011.08.009	https://linkinghub.elsevier.com/retrieve/pii/S1364815211001927	We describe a decision support system that has been developed to inform management and planning in a portion of the St. Lawrence Estuary in Canada (covering the Saguenay-St. Lawrence Marine Park and the proposed St. Lawrence Estuary Marine Protected Area). The system is composed of a spatiotemporal, georeferenced database, a simulator (3MTSim) that reproduces the spatiotemporal movement of marine…	26	12	1403-1418
Journal article	2018	Truchon, M.-H.; Measures, L.; BRÊTHES, J.-C.; Albert, E.; Michaud, R.	Influence of anthropogenic activities on marine mammal strandings in the estuary and northwestern Gulf of St. Lawrence, Quebec, Canada, 1994-2008.	Journal of Cetacean Research and Management				Stranding records have long been used to monitor marine mammal mortalities and to help identify threats to populations. In coastal areas, marine mammals face numerous anthropogenic threats such as marine traffic and commercial fishing. The objective of this study was to investigate marine mammal stranding records from the St. Lawrence Estuary (SLE) and the northwestern Gulf of St. Lawrence (NWGSL…	18		2021-11-21
Book section	2014	Higham, James; Bejder, Lars; Williams, Rob	Tourism, cetaceans and sustainable development	Whale-watching	978-1-139-01816-6		https://www.cambridge.org/core/product/identifier/CBO9781139018166A011/type/book_part	The majestic aspects of whales – their size; the apparent intelligence of some whales; the songs of others – led to rediscovery of the old iconography – whales as magnificent in their own right.			2021-01-16				Cambridge University Press	Cambridge
Journal article	2020	Beauchesne, David; Daigle, Rémi M.; Vissault, Steve; Gravel, Dominique; Bastien, Andréane; Bélanger, Simon; Bernatchez, Pascal; Blais, Marjolaine; Bourdages, Hugo; Chion, Clément; Galbraith, Peter S.; Halpern, Benjamin S.; Lavoie, Camille; McKindsey, Christopher W.; Mucci, Alfonso; Pineault, Simon; Starr, Michel; Ste-Marie, Anne-Sophie; Archambault, Philippe	Characterizing Exposure to and Sharing Knowledge of Drivers of Environmental Change in the St. Lawrence System in Canada	Frontiers in Marine Science		10.3389/fmars.2020.00383	https://www.frontiersin.org/article/10.3389/fmars.2020.00383/full	The St. Lawrence is a vast and complex socio-ecological system providing a wealth of services that sustain numerous economic sectors. This ecosystem is subject to significant human pressures that overlap and potentially interact with climate-driven environmental changes. Our objective in this paper was to systematically characterize the distribution and intensity of drivers of environmental chang…	7		383
Report	2017	Williams, R.; Lacy, R. C.; Ashe, E.; Hall, A.; Lehoux, C.; Lesage, V.; Pourde, S.	Predicting responses of St. Lawrence beluga to environmental change and anthropogenic threats to orient effective management actions				https://www.dfo-mpo.gc.ca/csas-sccs/Publications/ResDocs-DocRech/2017/2017_027-eng.html	The St. Lawrence Estuary (“SLE”) population of beluga (Delphinapterus leucas) was depleted by hunting. The population failed to increase in numbers at the rate one would expect after cessation of hunting. We conducted a population viability analysis (“PVA”) to quantify factors that most likely limit recovery of SLE beluga. The main threats considered were: changes in prey abundance; changes in fo…							Canadian Science Advisory Secretariat2017	Ottawa
St. Lawrence Beluga - Management
document	2015		Response Statement - Beluga Whale, St. Lawrence Estuary population_2015												Minister of the Environment, Canada
document	2017	LeBlanc, Dominic; Minister of Fisheries and Oceans	Registration SOR/2017-263 December 4, 2017 SPECIES AT RISK ACT - Designation of Critical Habitat of St. Lawrence Beluga												Canada Gazette Part II
Book	2014	Committee on the Status of Endangered Wildlife in Canada	COSEWIC assessment and status report on the beluga whale, Delphinapterus leucas, St. Lawrence Estuary population, in Canada.		978-1-100-23284-3			Committee on the Status of Endangered Wildlife in Canada (COSEWIC) status reports are working documents used in assigning the status of wildlife species suspected of being at risk. This document includes both an assessment and status report on the beluga whale (Delphinapterus leucas) in Canada. It includes species information, distribution, habitat, and biology information, as well as population …
Report	2014		STATUS OF BELUGA (DELPHINAPTERUS LEUCAS) IN THE ST. LAWRENCE RIVER ESTUARY					• The beluga is an Arctic species, and the St. Lawrence Estuary (SLE) population is at the southernmost limit of the species distribution. It occurs primarily in the SLE and seasonally in the Gulf of St. Lawrence. Its current range is about 65% of the extent used historically, whereas the size of its annual core distribution is at the lower limit of areas of occupancy described for any population…			17			Canadian Science Advisory Secretariat Science Advisory Report	Department of Fisheries and Oceans Canada	Quebec, Canada
Report	2010	Department of Fisheries and Oceans Canada	Advice relevant to the identification of critical habitat for St. Lawrence beluga (Delphinapterus leucas).					Several characteristics of beluga as a species and of the St. Lawrence population in particular should be considered when assessing the habitat critical for the survival and recovery of St. Lawrence beluga: • Beluga is an Arctic species, but one population occurs in the St. Lawrence Estuary. This environment is favorable to their continued presence as a result of an upwelling of cold, high produc…			8			Canadian Science Advisory Secretariat Science Advisory Report
Report	2020	Fisheries and Oceans Canada	Review of the Effectiveness of Recovery Measures for St. Lawrence Estuary Beluga				https://www.dfo-mpo.gc.ca/species-especes/publications/mammals-mammiferes/whalereview-revuebaleine/review-revue/beluga/page01-eng.html	In November 2016, Canada's Oceans Protection Plan (OPP) was announced, which outlined several new initiatives aimed at addressing the threats to marine mammals in Canadian waters, including the key threats of contaminants, prey availability, and underwater noise. Under the OPP, the Government of Canada will also take action to address the cumulative effects of shipping on marine mammals, and work…			64				Department of Fisheries and Oceans Canada
Journal article	2007	Lesage, Véronique; Gosselin, Jean-Francois; Hammill, M.O.; Kingsley, Michael; Lawson, J.W.	Ecologically and Biologically Significant Areas (EBSAs) in the Estuary and Gulf of St. Lawrence - A marine mammal perspective. Research Document	Can Sci Adv Sec					2007		1994-01-01
Journal article	2002	Kingsley, Michael CS	Status of the belugas of the St Lawrence estuary, Canada	NAMMCO Scientific Publications		10.7557/3.2847	https://septentrio.uit.no/index.php/NAMMCOSP/article/view/2847	A population of belugas (Delphinapterus leucas) inhabiting the estuary of the St Lawrence river in Quebec, Canada, was depleted by unregulated hunting, not closed until 1979. Surveys in 1977 showed only a few hundred in the population. Surveys since then have produced increasing estimates of population indices. An estimate of the population, fully corrected for diving animals, was 1,238 (SE 119) …	4		239
Journal article	2001	Lesage, V; Hammill, Mo; Kovacs, Km	Marine mammals and the community structure of the Estuary and Gulf of St Lawrence, Canada: evidence from stable isotope analysis	Marine Ecology Progress Series		10.3354/meps210203	http://www.int-res.com/abstracts/meps/v210/p203-221/	The trophic relationships of both the benthic and pelagic communities in the Estuary and Gulf of St Lawrence regions were examined, with a special focus on the trophic position (TP) and relationship(s) among harbour, grey, hooded and harp seals and beluga whales. A multiple stable isotope and multiple tissue approach, used in:conjunction with conventional dietary information, suggested that marin…	210		203-221
Journal article	2012	Lemieux Lefebvre, S; Michaud, R; Lesage, V; Berteaux, D	Identifying high residency areas of the threatened St. Lawrence beluga whale from fine-scale movements of individuals and coarse-scale movements of herds	Marine Ecology Progress Series		10.3354/meps09570	http://www.int-res.com/abstracts/meps/v450/p243-257/	The development of high-performance tracking and analytical tools has greatly facilitated the study of animal movements, which, in turn, are increasingly employed to study habitat use. However, data on individual movements are rarely available at both broad spatial and temporal scales, limiting their utility for the study of habitat use at population levels. In this study, we propose a novel appr…	450		243-257
Journal article	1991	Prescott, Jacques	The Saint Lawrence Beluga: A Concerted Effort to Save an Endangered Isolated Population	Environmental Conservation		10.1017/S0376892900022608	https://www.cambridge.org/core/product/identifier/S0376892900022608/type/journal_article	In September 1988, more than 300 participants attended the First International Forum on the Future of the Beluga, held in Tadoussac, Quebec, Canada. This Forum, organized by the ‘Fondation pour la Sauvegarde des Espèces Menacées’ (FOSEM), was intended to contribute to the development and the implementation of a survival strategy for the endangered St Lawrence population of the White Whale or Belu…	18	4	351-355
document	1993	Environment Canada	Interdepartmental Action Plan to Favour the Survival of the St. Lawrence Beluga Whale: Annual report 1992-93					An extensive research program was initiated to improve the protection and conservation of the St. Lawrence beluga. This report describes research efforts undertaken as part of this action plan. Topics covered include the following: increasing our knowledge of the beluga population; habitat conservation; controlling disturbances; contaminant flux in the beluga's food chain; controlling toxic waste…							Environment Canada
Report	1990	Michaud, R.; Vezina, A.; Rondeau, N.; Vigneault, Y.	ANNUAL DISTRIBUTION AND PRELIMINARY CHARACTERIZATION OF BELUGA (DELPHINAPTERUS LEUCAS) HABITATS IN THE ST. LAWRENCE											Can Tech Rep Fish Aquat Sci,
Journal article	1988	Sergeant, D.E.; Hoek, W.	An update of the status of white whales Delphinapterus leucas in the Saint Lawrence estuary, Canada	Biological Conservation		10.1016/0006-3207(88)90060-2	https://linkinghub.elsevier.com/retrieve/pii/0006320788900602	The population of white whales Delphinapterus leucas Pallas in the Saint Lawrence estuary declined rapidly between the 1930s and the 1970s, probably due successively to commercial hunting followed by sport hunting; pollutant chemicals, the most likely candidates being polychlorinated biphenyls or their impurities such as dioxins, may have prevented subsequent increases. A population, apparently s…	45	4	287-302
Magazine article	1991	Beland, P.	The beluga whales of the St. Lawrence River	Scientific American					274	5	74-81
Journal article	2019	Hobbs, R. C.; Reeves, R. R.; Prewitt, J.; Desportes, G.; Breton-Honeyman, K.; Christensen, T.; Citta, J. J.; Ferguson, S. H.; Frost, K. J.; Garde, E.	Global review of the conservation status of monodontid stocks	Marine Fisheries Review		10.7755/MFR.81.3–4.p		The monodontids—nar-whals, Monodon monoceros, and belugas, Delphinapterus leucas—are found in much of the Arctic and in some subarctic areas. They are hunted by indigenous subsistence users. In the past, some populations were substantially reduced by commercial hunt-ing and culling; more recently, some popu-lations have declined due to uncontrolled subsistence hunting and environmentaldegradation…	81	2021-03-04	1962-01-01
Journal article	2012	Boxall, P.C.; Adamowicz, W.L.; Olar, M.; West, G.E.; Cantin, G.	Analysis of the economic benefits associated with the recovery of threatened marine mammal species in the Canadian St. Lawrence Estuary	Marine Policy		10.1016/j.marpol.2011.05.003	https://linkinghub.elsevier.com/retrieve/pii/S0308597X11000923	This paper examines Canadians' willingness to pay to recover the populations of three marine mammal species found in the St Lawrence Estuary. The valuation approach utilized a stated preference tool that is somewhat a hybrid between contingent valuation and a choice experiment with multiple species recovery program options and choices framed as referenda. Program options involved the use of a mar…	36	1	189-197
Report	2012	Department of Fisheries and Oceans	Recovery Strategy for the Beluga Whale (Delphinapterus leucas), St. Lawrence Estuary Population in Canada				https://www.sararegistry.gc.ca/virtual_sara/files/plans/rs_st_laur_beluga_0312_e.pdf				99			Species at Risk Act Recovery Strategy	Department of Fisheries and Oceans Canada
St. Lawrence Beluga - Pollution
Report	2014	Lebeuf, M.; Raach, M.; Measures, L.; Ménard, N.; Hammill, M.	Temporal trends of PBDEs in adult and newborn beluga (Delphinapterus leucas) from the St. Lawrence Estuary.					In the 2008-2012 time period an unusually high number of stranded newborn beluga was recorded in the St. Lawrence Estuary (SLE). Blubber concentrations of polybrominated diphenyl ethers (PBDEs) in adult female beluga were not significantly different in 2008-2012 compared to the previous 10 years. Similarly, PBDE concentrations in stranded newborns in 2008-2012 were not significantly different tha…			16			Canadian Science Advisory Secretariat Science Advisory Report
Journal article	2017	Couillard, Catherine M; Ouellet, P; Verreault, G; Senneville, S; St-Onge-Drouin, S; Lefaivre, D	Effect of decadal changes in freshwater flows and temperature on the larvae of two forage fish species in coastal nurseries of the St. Lawrence Estuary	Estuaries and Coasts		10.1007/s12237-016-0144-7		Since 2002, the abundance of larvae of rainbow smelt (Osmerus mordax) and Atlantic herring (Clupea harengus) has been monitored in July in coastal nurseries (Anse Ste.-Anne (ASA) and Banc de Rivière-du-Loup (BRL)) in the Middle St. Lawrence Estuary (MSLE), Canada. The two species are spatiotemporally segregated, with smelt larvae being more abundant at the upstream, less saline site (ASA) and hav…	40	1	268-285
Journal article	2018	Evers, D	The effects of methylmercury on wildlife: a comprehensive review and approach for interpretation	The encyclopedia of the Anthropocene					5		181-194
Journal article	2011	Hickie, Brendan; Kingsley, Michael; Hodson, Peter; Muir, Derek; Beland, Pierre; Mackay, Donald	A modelling-based perspective on the past, present, and future polychlorinated biphenyl contamination of the St. Lawrence beluga whale (Delphinapterus leucas) population	Canadian Journal of Fisheries and Aquatic Sciences		10.1139/f99-242		Individual- and population-based models are presented that provide quantitative assessments of the accumulation of persistent organic pollutants over the lifetime of the beluga whale (Delphinapterus leucas) and consider all aspects of its life history. The models are used to examine the history of polychlorinated biphenyl (PCB) accumulation by the endangered St. Lawrence beluga population from 19…	57		101-112
Journal article	2001	Lebeuf, M; Bernt, K.E; Trottier, S; Noël, M; Hammill, M.O; Measures, L	Tris (4-chlorophenyl) methane and tris (4-chlorophenyl) methanol in marine mammals from the Estuary and Gulf of St. Lawrence	Environmental Pollution		10.1016/S0269-7491(00)00032-4	https://linkinghub.elsevier.com/retrieve/pii/S0269749100000324		111	1	29-43
Journal article	1988	Allan, R. J.	Toxic chemical pollution of the St. Lawrence River (Canada) and its upper estuary	Water Science and Technology					20	2021-06-07	77-88
Journal article	2017	Simond, Antoine E.; Houde, Magali; Lesage, Véronique; Verreault, Jonathan	Temporal trends of PBDEs and emerging flame retardants in belugas from the St. Lawrence Estuary (Canada) and comparisons with minke whales and Canadian Arctic belugas	Environmental Research		10.1016/j.envres.2017.03.058	https://linkinghub.elsevier.com/retrieve/pii/S0013935116309641		156		494-504
Journal article	2007	Lebeuf, Michel; Noël, Michelle; Trottier, Steve; Measures, Lena	Temporal trends (1987–2002) of persistent, bioaccumulative and toxic (PBT) chemicals in beluga whales (Delphinapterus leucas) from the St. Lawrence Estuary, Canada	Science of The Total Environment		10.1016/j.scitotenv.2007.04.026	https://linkinghub.elsevier.com/retrieve/pii/S0048969707004421		383	2021-01-03	216-231
Journal article	2021	Barrett, Holly; Du, Xuan; Houde, Magali; Lair, Stéphane; Verreault, Jonathan; Peng, Hui	Suspect and Nontarget Screening Revealed Class-Specific Temporal Trends (2000–2017) of Poly- and Perfluoroalkyl Substances in St. Lawrence Beluga Whales	Environmental Science & Technology		10.1021/acs.est.0c05957	https://pubs.acs.org/doi/10.1021/acs.est.0c05957	The global use of >3000 per- and polyfluoroalkyl substances (PFASs) has given rise to chemical regulatory action. However, limited information exists regarding current and historical emissions for the majority of PFASs under currently implemented regulations. This study employed suspect and nontarget screening to examine the temporal trends of legacy and unregulated PFASs in liver of the endanger…	55	3	1659-1671
Journal article	2006	Michaud, M.-H.; Pelletier, É.	Sources and fate of butyltins in the St. Lawrence Estuary ecosystem	Chemosphere		10.1016/j.chemosphere.2005.12.002	https://linkinghub.elsevier.com/retrieve/pii/S0045653505014189	Butyltins (BTs) were determined in sediment, zooplankton, benthic fish and invertebrates in the St. Lawrence Estuary and its mixing zone with the Gulf of St. Lawrence (Canada) in an attempt to assess sources and fate of these compounds in a large ecosystem before the enforcement of the world-wide ban of TBT-based antifouling paints. All BTs (MBT, DBT and TBT) were found along the studied area (45…	64	7	1074-1082
Journal article	1996	Pham, T.; Lum, K.; Lemieux, C.	Seasonal variation of DDT and its metabolites in the St. Lawrence Reiver (Canada) and four of its tributaries	Science of the total environment				Water samples were collected in the St. Lawrence River and at the mouths of four major tributaries, the Richelieu, the Yamaska, the St. François and the Nicolet, between August 1990 and November 1991. Analyses were done for p,p′-DDT, o,p′-DDT, p,p′-DDE, p,p′-DDD and o,p′-DDD. In the St. Lawrence River, the highest mean (x̄ = 3.02 ng/l) was measured in April, during the period of spring thaw, and …	179		17-26
Journal article	1996	Muir, D.C.G.; Koczanski, K.; Rosenberg, B.; Béland, P.	Persistent organochlorines in beluga whales (Delphinapterus leucas) from the St Lawrence River estuary—II. Temporal trends, 1982–1994	Environmental Pollution		10.1016/0269-7491(96)00008-5	https://linkinghub.elsevier.com/retrieve/pii/0269749196000085	Blubber samples from 16 dead beluga whales (Delphinapterus leucas) collected during 1993-1994 in the St Lawrence River estuary were analysed for PCB congeners and other persistent organochlorines (DDT-group, chlorinated bornanes (toxaphene, CHB), chlordane (Sigma CHL), hexachloro-cyclohexanes (Sigma HCH), chlorobenzenes (Sigma CBz), tris(p-chlorophenyl methane (TPMe) and mirex). Concentrations an…	93	2	235-245
Journal article	2003	Hobbs, Karen E; Muir, Derek C.G; Michaud, Robert; Béland, Pierre; Letcher, Robert J; Norstrom, Ross J	PCBs and organochlorine pesticides in blubber biopsies from free-ranging St. Lawrence River Estuary beluga whales (Delphinapterus leucas), 1994–1998	Environmental Pollution		10.1016/S0269-7491(02)00288-9	https://linkinghub.elsevier.com/retrieve/pii/S0269749102002889	For the first time, organochlorine (OC) contaminants were measured in blubber biopsies from free-ranging St. Lawrence River Estuary beluga whales (Delphinapterus leucas), to compare contaminant levels to those previously measured in dead stranded belugas. PCBs, DDTs, toxaphene and chlordane-related compounds were the major OC contaminants detected in 44 belugas biopsied in 1994-1998. SigmaPCB (th…	122	2	291-302
Journal article	2011	Raach, Meriem; Lebeuf, Michel; Pelletier, Émilien	PBDEs and PCBs in the liver of the St Lawrence Estuary beluga (Delphinapterus leucas): a comparison of levels and temporal trends with the blubber	Journal of Environmental Monitoring		10.1039/c0em00310g	http://xlink.rsc.org/?DOI=c0em00310g		13	3	649
Journal article	2006	McKinney, Melissa A.; De Guise, Sylvain; Martineau, Daniel; Béland, Pierre; Lebeuf, Michel; Letcher, Robert J.	ORGANOHALOGEN CONTAMINANTS AND METABOLITES IN BELUGA WHALE (DELPHINAPTERUS LEUCAS) LIVER FROM TWO CANADIAN POPULATIONS	Environmental Toxicology and Chemistry		10.1897/05-284R.1	http://doi.wiley.com/10.1897/05-284R.1	Contaminants described as organochlorines (OCs; e.g., polychlorinated biphenyls [PCBs]) are present in tissues of marine mammals, including beluga whales (Delphinapterus leucas), but the complexity of contaminant exposure often is not fully known. The PCBs, OC pesticides, polybrominated diphenyl ether (PBDE) flame retardants, methylsulfonyl (MeSO<sub>2</sub>)- and hydroxy (OH)-PCB metabolites, an…	25	5	1246
Journal article	2000	Bennie, D.T.; Sullivan, C.A.; Maguire, R.J.	Occurrence of Chlorinated Paraffins in Beluga Whales (Delphinapterus leucas) from the St. Lawrence River and Rainbow Trout (Oncorhynchus mykiss) and Carp (Cyprinus carpio) from Lake Ontario	Water Quality Research Journal		10.2166/wqrj.2000.017	https://iwaponline.com/wqrj/article/35/2/263/40512/Occurrence-of-Chlorinated-Paraffins-in-Beluga	Abstract Samples of 25 dead beluga whales (Delphinapterus leucas) from the St. Lawrence River estuary, as well as samples of 10 rainbow trout (Oncorhynchus mykiss) and 3 carp (Cyprinus carpio) caught in western Lake Ontario were analyzed for total short- (C10-C13) and medium-(C14-C17) chain chlorinated paraffins (SMCCPs) using gas chromatography-low resolution negative chemical ioniza-tion mass s…	35	2	263-282
Journal article	2000	Letcher, Robert J.; Norstrom, Ross J.; Muir, Derek C.G.; Sandau, Courtney D.; Koczanski, Krystyna; Michaud, Robert; De Guise, Sylvian; Béland, Pierre	Methylsulfone polycglorinated biphenyl and 2,2-bis(chlorophenyl)-1,1-dichloroethylene metabolites in beluga whale ( <i>Delphinapterus leucas</i> ) from the St. Lawrence river estuary and western Hudson bay, Canada	Environmental Toxicology and Chemistry		10.1002/etc.5620190521	http://doi.wiley.com/10.1002/etc.5620190521		19	5	1378-1388
Journal article	2020	Simond, Antoine E.; Houde, Magali; Lesage, Véronique; Michaud, Robert; Verreault, Jonathan	Metabolomic profiles of the endangered St. Lawrence Estuary beluga population and associations with organohalogen contaminants	Science of The Total Environment		10.1016/j.scitotenv.2020.137204	https://linkinghub.elsevier.com/retrieve/pii/S0048969720307142	The endangered beluga (Delphinapterus leucas) population residing in the St. Lawrence Estuary (SLE; Eastern Canada) is declining. The elevated tissue concentrations of a wide range of organohalogen contaminants might play a role in the non-recovery of this whale population. Organohalogens have been reported to impair the regulation of several metabolic products from cellular reactions in mammals …	717		137204
Journal article	1987	Martineau, D.; Beland, P.; Desjardins, C.; Lagac�, A.	Levels of organochlorine chemicals in tissues of beluga whales (Delphinapterus leucas) from the St. Lawrence Estuary, Qu�bec, Canada	Archives of Environmental Contamination and Toxicology		10.1007/BF01055795	http://link.springer.com/10.1007/BF01055795		16	2	137-147
Journal article	2003	Gouteux, Bruno; Lebeuf, Michel; Muir, Derek C. G.; Gagné, Jean-Pierre	Levels and Temporal Trends of Toxaphene Congeners in Beluga Whales ( <i>Delphinapterus leucas</i> ) from the St. Lawrence Estuary, Canada	Environmental Science & Technology		10.1021/es034449e	https://pubs.acs.org/doi/10.1021/es034449e	Environmentally relevant toxaphene congeners were determined in blubber samples of stranded beluga whales (Delphinapterus leucas) from the St. Lawrence Estuary (SLE), Canada. The purpose of this study was to evaluate the levels and the temporal trends (1988-1999) of a suite of six chlorobornanes (P26, P40/41, P44, P50, and P62) in the SLE belugas. P26 and P50 mean concentrations were in the same …	37	20	4603-4609
Journal article	2016	Cadieux, Marc A.; Muir, Derek C. G.; Béland, Pierre; Hickie, Brendan E.	Lactational Transfer of Polychlorinated-Biphenyls (PCBs) and Other Organochlorines in St. Lawrence Beluga Whales (Delphinapterus leucas)	Archives of Environmental Contamination and Toxicology		10.1007/s00244-015-0223-y	http://link.springer.com/10.1007/s00244-015-0223-y	This study uses an individual-based contaminant bioaccumulation model for marine mammals to explore factors controlling the transfer of PCBs from mother to calf via nursing in beluga from the St. Lawrence Estuary. Beluga blubber samples ( n = 46), along with four matched milk samples from stranded animals over the 1986-1994 period were used for comparison with modelled results. Based on 68 POPs, …	70	1	169-179
Journal article	2000	St-Louis, R.; de Mora, S.; Pelletier, M.; Doidge, B.; Leclair, D.; Mikaelian, I.; Martineau, D.	Hepatic butyltin concentrations in beluga whales (Delphinapterus leucas) from the St Lawrence Estuary and northern Quebec, Canada	Applied Organometallic Chemistry		10.1002/(SICI)1099-0739(200004)14:4<218::AID-AOC983>3.0.CO;2-R		Butyltin (tributyltin TBT; dibutyltin DBT and monobutyltin MET) speciation was measured in the liver of beluga whales from the St Lawrence Estuary and Hudson Strait (northern Quebec), Using GC-MS, liver samples were analysed from 21 beluga whales found dead, stranded along the shores of the St Lawrence during the period 1995-1998, In all cases, including a neonate specimen, the liver was contamin…	14	4	218-226
Journal article	1994	De Guise, Sylvain; Lagacé, André; Béland, Pierre	Gastric Papillomas in Eight St. Lawrence Beluga Whales ( <i>Delphinapterus Leucas</i> )	Journal of Veterinary Diagnostic Investigation		10.1177/104063879400600322	http://journals.sagepub.com/doi/10.1177/104063879400600322		6	3	385-388
Journal article	1997	Kiceniuk, Joe W.; Holzbecher, Jiri; Chatt, Amares	Extractable organohalogens in tissues of beluga whales from the Canadian Arctic and the St. Lawrence estuary	Environmental Pollution		10.1016/S0269-7491(97)00100-0	https://linkinghub.elsevier.com/retrieve/pii/S0269749197001000	Samples of blubber, brain, kidney, liver, and muscle of individual beluga whales were extracted and analyzed for extractable organic Cl (EOCl), Br (EOBr), and I (EOI) by neutron activation analysis. The highest levels of EOCl (554 Mu g g<sup>-1</sup> lipid) were found in thekidney of Arctic beluga and the lowest (24 Mu g g<sup>-1</sup> lipid) in the blubber. Levels in brain and liver lipids were …	97	3	205-211
Journal article	1998	Gauthier, J.M; Pelletier, É; Brochu, C; Moore, S; Metcalfe, C.D; Béland, P	Environmental contaminants in tissues of a neonate St Lawrence Beluga Whale (Delphinapterus leucas)	Marine Pollution Bulletin		10.1016/S0025-326X(98)90043-1	https://linkinghub.elsevier.com/retrieve/pii/S0025326X98900431	Researchers analyzed tissue samples of brain, kidney, liver, and blubber from a neonate St. Lawrence beluga whale for PCB congeners, organochlorines, PCDD, PCDF, and total mercury. Concentrations of PCBs, organochlorines, and mercury were lower than or in the lower range of those found in published data on female adult beluga whales of the St. Lawrence. klf (Copyright applies to all Abstracts.)	36	1	102-108
Conference paper	2000	DeGuise, S.	Environmental Contaminants in St. Lawrence Belugas: Toxic Impacts and Possible Mechanisms of Action								76				Citeseer
Book section	2012	Martineau, D.	BELUGA FROM THE ST. LAWRENCE ESTUARY	New Directions in Conservation Medicine: Applied Cases of Ecological Health	978-0-19-973147-3						390-408				Oxford University Press
Journal article	2014	Lebeuf, Michel; Measures, Lena; Noël, Michelle; Raach, Meriem; Trottier, Steve	A twenty-one year temporal trend of persistent organic pollutants in St. Lawrence Estuary beluga, Canada	Science of The Total Environment		10.1016/j.scitotenv.2014.03.097	https://linkinghub.elsevier.com/retrieve/pii/S0048969714004379	Persistent organic pollutants (POPs) were measured in blubber from 144 stranded adult belugas (Delphinapterus leucas) found on the shores of the St. Lawrence Estuary (SLE) between 1987 and 2007. Temporal trends of POP concentrations (ln transformed) in beluga were described by three models, zero slope (ZS), linear (L) and two-segment piecewise (PW). Often two but sometimes all three models were e…	485-486		377-386
Journal article	2004	Lebeuf, Michel; Gouteux, Bruno; Measures, Lena; Trottier, Steve	Levels and Temporal Trends (1988−1999) of Polybrominated Diphenyl Ethers in Beluga Whales ( <i>Delphinapterus leucas</i> ) from the St. Lawrence Estuary, Canada	Environmental Science & Technology		10.1021/es035187j	https://pubs.acs.org/doi/10.1021/es035187j	Polybrominated diphenyl ethers (PBDEs) were determined in blubber samples of 54 stranded adult beluga whales (Delphinapterus leucas) collected between 1988 and 1999 in the St. Lawrence Estuary (SLE), Quebec, Canada. Summed concentrations of 10 PBDE congeners (ΣPBDEs) measured in beluga samples varied between 20 and almost 1000 ng/g wet weight According to the PBDE concentrations in marine mammals…	38	11	2971-2977
Journal article	2019	Poirier, Miriam C.; Lair, Stéphane; Michaud, Robert; Hernández-Ramon, Elena E.; Divi, Kathyayini V.; Dwyer, Jennifer E.; Ester, Corbin D.; Si, Nancy N.; Ali, Mehnaz; Loseto, Lisa L.; Raverty, Stephen A.; St. Leger, Judith A.; Van Bonn, William G.; Colegrove, Kathleen; Burek-Huntington, Kathleen A.; Suydam, Robert; Stimmelmayr, Raphaela; Wise, John Pierce; Wise, Sandra S.; Beauchamp, Guy; Martinea…	Intestinal polycyclic aromatic hydrocarbon-DNA adducts in a population of beluga whales with high levels of gastrointestinal cancers: PAH-DNA Adducts in Intestine of Whales With Cancer	Environmental and Molecular Mutagenesis		10.1002/em.22251	http://doi.wiley.com/10.1002/em.22251	Carcinogenic polycyclic aromatic hydrocarbons (PAHs) were disposed directly into the Saguenay River of the St. Lawrence Estuary (SLE) by local aluminum smelters (Quebec, Canada) for 50 years (1926-1976). PAHs in the river sediments are likely etiologically related to gastrointestinal epithelial cancers observed in 7% of 156 mature (>19-year old) adult beluga found dead along the shorelines. Becau…	60	1	29-41
Journal article	2002	Martineau, Daniel	Reply to Comments of Kingsley on Martineau et al. 1999. Cancerin Beluga Whales from the St. Lawrence Estuary, Quebec, Canada: A Potential Biomarkerof Environmental Contamination. Journalof Cetacean Researchand Management, Special Issue 1: 249–265	Marine Mammal Science		10.1111/j.1748-7692.2002.tb01060.x	http://doi.wiley.com/10.1111/j.1748-7692.2002.tb01060.x		18	2	574-576
Journal article	2002	Kingsley, Michael C. S.	Commenton Martineau et al. 1999. Cancerin Beluga Whales from the St. Lawrence Estuary, Quebec, Canada: A Potential Biomarkerof Environmental Contamination. Journalof Cetacean Researchand Management, Special Issue 1:249–265	Marine Mammal Science		10.1111/j.1748-7692.2002.tb01059.x	http://doi.wiley.com/10.1111/j.1748-7692.2002.tb01059.x		18	2	572-574
Journal article	1997	Hording, Gareth C.; LeBlanc, Raynald J.; Vass, W.Peter; Addison, Richard F.; Hargrave, Barry T.; Pearre, Sifford; Dupuis, Annie; Brodie, Paul F.	Bioaccumulation of polychlorinated biphenyls (PCBs) in the marine pelagic food web, based on a seasonal study in the southern Gulf of St. Lawrence, 1976–1977	Marine Chemistry		10.1016/S0304-4203(96)00077-1	https://linkinghub.elsevier.com/retrieve/pii/S0304420396000771	Polychlorinated biphenyls (PCBs) were quantified in bulk seawater (3.1 +/- 1.0 ng l(-1), N = 3) in 1976, in plankton (2.9 +/- 3.3 ng g(-1) wet weight, N = 176) in 1976 and 1977 and in fish (155 +/- 194 ng g(-1) wet weight, N = 135) in 1977 collected from St. Georges Bay in the southern Gulf of St. Lawrence. PCB concentrations in the plankton of the entire water column varied seasonally by ten tim…	56	2021-03-04	145-179
Journal article	1995	De Guise, S; Martineau, D; Béland, P; Fournier, M	Possible mechanisms of action of environmental contaminants on St. Lawrence beluga whales (Delphinapterus leucas).	Environmental Health Perspectives		10.1289/ehp.95103s473	https://ehp.niehs.nih.gov/doi/10.1289/ehp.95103s473	A small isolated population of beluga whales (Deiphinapterus leucas) that are highly contaminated by pollutants, mostly of industrial origin, resides in the St. Lawrence estuary, Quebec, Canada. Overhunting in the first half of the century was the probable cause for this population to dwindle from several thousand animals to the current estimate of 500. The failure of the population to recover mi…	103	suppl 4	73-77
Journal article	1993	Béland, Pierre; DeGuise, Sylvain; Girard, Christiane; Lagacé, André; Martineau, Daniel; Michaud, Robert; Muir, Derek C.G.; Norstrom, Ross J.; Pelletier, Émilien; Ray, Sankar; Shugart, Lee R.	Toxic Compounds and Health and Reproductive Effects in St. Lawrence Beluga Whales	Journal of Great Lakes Research		10.1016/S0380-1330(93)71264-2	https://linkinghub.elsevier.com/retrieve/pii/S0380133093712642	An epidemiologic study was carried out over a period of 9 years on an isolated population of beluga whales (Delphinapterus leucas) residing in the St. Lawrence estuary (Quebec, Canada). More than 100 individual deaths were aged, and/or autopsied and analyzed for toxic compounds, and the population was surveyed for size and structure. Arctic belugas and other species of whales and seals from the S…	19	4	766-775
Journal article	1999	Metcalfe, C; Metcalfe, T; Ray, S; Paterson, G; Koenig, B	Polychlorinated biphenyls and organochlorine compounds in brain, liver and muscle of beluga whales (Delphinapterus leucas) from the Arctic and St. Lawrence estuary	Marine Environmental Research		10.1016/S0141-1136(98)00107-X	https://linkinghub.elsevier.com/retrieve/pii/S014111369800107X	Brain, liver and muscle samples from seven male beluga whales, Delphinapterus leucas, from Hendrickson Island in the Canadian Arctic (n =3) and the St. Lawrence River estuary (n = 4), were analyzed for polychlorinated biphenyls (PCBs) and other organochlorine (OC) compoundsto determine whether there are differences in the distribution of these contaminants in beluga tissues and between geographic…	47	1	2021-01-15
Conference paper	1993	Hickie, B.E.; McKay, M. C.	Modelling contaminant fate in whales. II: Applications to the St. Lawrence beluga whale	Ecological risk assessment: Lessons learned?. Abstract book				The burden of organochlorine contaminants found in marine mammals result from accumulation processes operating over their entire life span. Tissue concentrations typically vary with age, sex, reproductive effort, and condition, making it difficult to relate them to the concentrations found in other environmental compartments. A pharmacokinetic model has been developed for marine mammals which inc…			190-190				Society of Environmental Toxicology and Chemistry	Houston, Texas
Journal article	1994	DeGuise, S.; Lair, S.; Fournier, M.; Martineau, D.; Beland, P.	ADRENAL LESIONS IN ST. LAWRENCE BELUGA WHALES AND THEIR POSSIBLE RELATION TO ORGANOHALOGENS	American Zoologist					34	5	73-73
Journal article	2001	Fox, G A	Wildlife as sentinels of human health effects in the Great Lakes--St. Lawrence basin.	Environmental Health Perspectives		10.1289/ehp.01109s6853	https://ehp.niehs.nih.gov/doi/10.1289/ehp.01109s6853	There is no existing formal, long-term program for gathering evidence of the incidence and severity of the health effects of toxic substances in wildlife. However, research-based studies of bald eagles, herring gulls, night herons, tree swallows, snapping turtles, mink, and beluga over the past 30 years have revealed a broad spectrum of health effects in the Great Lakes-St. Lawrence basin includi…	109	suppl 6	853-861
Report	2012	DelVecchio, R.; Unsworth, R.; Leggett, C.	St. Lawrence River Environment Natural Resource Damage Assessment: Restoration and Compensation Determination Plan and and Environmental Assessment				https://www.cerc.usgs.gov/orda_docs/DocHandler.ashx?task=get&ID=8872/13/2021	For decades, three industrial facilities in Massena, New York have released hazardous substances to the St. Lawrence River environment. The facilities include Alcoa West, Alcoa East (the former Reynolds Metals Corporation), and the General Motors Central Foundry (together, the Facilities). Production wastes and associated contaminants (including, but not limited to, PCBs, PAHs, fluoride, and meta…			148				Natural Resource Trustees of the St. Lawrence River Environment:
Thesis	2008	Cadieux, M. A.	Modelling the Bioaccumulation of Polychlorinated Biphenyls (PCBs) in Two Species of Marine Mammal: Beluga Whales (Delphinapterus Leucas), and Harbour Seals (Phoca Vitulina).				https://central.bac-lac.gc.ca/.item?id=MR43202&op=pdf&app=Library&oclc_number=682256385	Polychlorinated biphenyls (PCBs) are toxic industrial chemicals that have been detected at very high concentrations in apex predators, such as marine mammals. Using two bioaccumulation models for marine mammals, this thesis examined the bioaccumulation of PCBs in beluga whales {Delphinapterus leucas) from the St. Lawrence Estuary (Quebec, Canada), and harbour seals {Phoca vitulina) from The Strai…				172			Trent University	Peterborough, Ontario, Canada
Journal article	1986	Massé, R.; Martineau, Daniel; Tremblay, Lyne; Beland, P.	Concentrations and chromatographic profile of DDT metabolites and polychlorobiphenyl (PCB) residues in stranded beluga whales (Delphinapterus leucas) from the St. Lawrence Estuary, Canada	Archives of Environmental Contamination and Toxicology		10.1007/BF01056571	http://link.springer.com/10.1007/BF01056571	The concentrations and high resolution gas chromatographic profiles of DDT metabolites and polychlorobiphenyl (PCB) congeners were determined in blubber, liver, kidney and lung tissue and milk samples of stranded beluga whales (Delphinapterus leucas) collected at localities along the coasts of the Saint Lawrence Estuary, Canada from November 1983 through December 1984. The analyses indicate that …	15	5	567-579
Journal article	2019	Simond, Antoine E.; Houde, Magali; Lesage, Véronique; Michaud, Robert; Zbinden, Dany; Verreault, Jonathan	Associations between organohalogen exposure and thyroid- and steroid-related gene responses in St. Lawrence Estuary belugas and minke whales	Marine Pollution Bulletin		10.1016/j.marpolbul.2019.05.029	https://linkinghub.elsevier.com/retrieve/pii/S0025326X19303881	Elevated concentrations of persistent organic pollutants (POPs) and emerging halogenated flame retardants (HFRs) have been reported in tissues of the endangered St. Lawrence Estuary (Canada) beluga population as well as in minke whales visiting that same feeding area. This study examined the linkages between blubber concentrations of POPs and emerging HFRs, and transcription in skin of genes invo…	145		174-184
Journal article	2021	Bernier-Graveline, Alexandre; Lesage, Véronique; Cabrol, Jory; Lair, Stéphane; Michaud, Robert; Rosabal, Maikel; Verreault, Jonathan	Lipid metabolites as indicators of body condition in highly contaminant-exposed belugas from the endangered St. Lawrence Estuary population (Canada)	Environmental Research		10.1016/j.envres.2020.110272	https://linkinghub.elsevier.com/retrieve/pii/S0013935120311695	The endangered St. Lawrence Estuary (SLE) beluga population is declining and has shown no sign of recovery over the past decades despite several protective measures. Changes in the availability of food resources and exposure to organohalogen contaminants have been suggested as potential factors limiting the recovery of this population. Studies on SLE belugas have suggested that contaminant exposu…	192		110272
St. Lawrence Beluga - Status/Range
Report	2017	IUCN	Delphinapterus leucas: Lowry, L., Reeves, R. & Laidre, K.: The IUCN Red List of Threatened Species 2017: e.T6335A50352346				http://www.iucnredlist.org/details/6335/0								International Union for Conservation of Nature
Thesis	1998	de la Cheneliere, V.	The risks and benefits of an invasive technique, biopsy sampling, for an endaagered population, the St. Lawrence beluga (Delphinapterus leucas)				https://central.bac-lac.gc.ca/.item?id=MQ50749&op=pdf&app=Library&oclc_number=1006901473	Research can conflict with conservation when invasive techniques are used on protected animal species. We developed a decision fiamework including the research question, the choice of technique, and the recomrnended course of action following the evaluation of the risks and benefits. This evaluation includes biological risks and benefits and considerations linked to the perception of resource use…				71			McGill University	Montreal, Canada
Journal article	1998	Curren, K.; Lien, J.	Observations of White Whales, Delphinapterus leucas, in waters off Newfoundland and Labrador and in the Gulf of St. Lawrence, 1979-1991	Canadian Field Naturalist				Thirty-seven sightings, strandings and gear entrapments of White Whales (Delphinapterus leucas) made in Newfoundland and Labrador waters and the lower Gulf of St. Lawrence from 1979 to 1991 are reported. Most of these incidents occurred in the summer months with a mean rate of 2.6 records per year. Fourteen (38%) of the observed animals were dead when discovered; fates of the remaining animals we…	112	1	28-31
Journal article	1975	Sergeant, D. E.; Brodie, P. F.	Identity, Abundance, and Present Status of Populations of White Whales, <i>Delphinapterus leucas</i> , in North America	Journal of the Fisheries Research Board of Canada		10.1139/f75-123	http://www.nrcresearchpress.com/doi/10.1139/f75-123	White whales, Delphinapterus leucas, in the North American arctic number at least 30,000 animals. Largest herds identified are about 10,000 animals in western Hudson Bay, at least as many in Lancaster Sound, and at least 5000 summering in the Beaufort Sea. Hunting in the Canadian arctic has decreased in the last decade from 1000 or more to about 500 annually and is clearly well below sustainable …	32	7	1047-1054
St. Lawrence Beluga - Noise/Communication
Report	2014	Department of Fisheries and Oceans Canada	Impacts of rerouting marine traffic in the St. Lawrence estuary on beluga (Delphinapterus leucas): Science in support of risk management.								9			Canadian Science Advisory Secretariat Science Advisory Report
Report	2016	Department of Fisheries and Oceans Canada	EFFECTS OF DREDGING ACTIVITIES ON ST. LAWRENCE BELUGA AND THEIR HABITAT								17			Canadian Science Advisory Secretariat Science Response
Book	2020	Canada; Department of Fisheries and Oceans	Action plan to reduce the impact of noise on the beluga whale (Delphinapterus leucas) and other marine mammals at risk in the St. Lawrence estuary.		978-0-660-34046-3		http://publications.gc.ca/collections/collection_2020/mpo-dfo/CW69-21-63-2020-eng.pdf	"This action plan aims to reduce the impact of noise on marine mammals at risk in the St. Lawrence Estuary and in the Saguenay Fjord, a site regularly frequented by Belugas in the summer. The document proposes measures to learn more about the various sources of noise and to mitigate its impacts to contribute to the recovery of marine mammals at risk in the St. Lawrence Estuary"--Summary, page iii.
Report	2014	Lesage, V.; McQuinn, I.H.; Carrier, D.; Gosselin, J.-F.; Mosnier, A.	Exposure of the beluga (Delphinapterus leucas) to marine traffic under various scenarios of transit route diversion in the St. Lawrence Estuary					The St. Lawrence Estuary (SLE) marine shipping lane currently overlaps with the main aggregation area for large baleen whales, male beluga and whale-watching activity, raising concerns for potential whale/ship or whale-watch vessel/ship collisions. Motivated by the desire to reduce collision risks, authorities from the Saguenay-St. Lawrence Marine Park and the future Marine Protected Area through…			32			Canadian Science Advisory Secretariat Science Advisory Report
Journal article	2005	Scheifele, Peter M; Darre, Michael	Noise Levels and Sources in the Stellwagen Bank National Marine Sanctuary and the St. Lawrence River Estuary				https://sanctuaries.noaa.gov/science/conservation/sound_study.html	Although ambient (background) noise in the ocean is a topic that has been widely studied since pre-World War II, the effects of noise on marine organisms has only been a focus of concern for the last 25 years. The main point of concern has been the potential of noise to affect the health and behavior of marine mammals. The Stellwagen Bank National Marine Sanctuary (SBNMS) is a site where the degr…
Journal article	2018	Chion, Clément; Turgeon, Samuel; Cantin, Guy; Michaud, Robert; Ménard, Nadia; Lesage, Véronique; Parrott, Lael; Beaufils, Pierre; Clermont, Yves; Gravel, Caroline	A voluntary conservation agreement reduces the risks of lethal collisions between ships and whales in the St. Lawrence Estuary (Québec, Canada): From co-construction to monitoring compliance and assessing effectiveness	PLOS ONE		10.1371/journal.pone.0202560	https://dx.plos.org/10.1371/journal.pone.0202560	Lethal collisions with ships are limiting the recovery of several at-risk whale species worldwide. In the St. Lawrence Estuary (Quebec, Canada), the endangered blue whale and of special concern fin whale are among the migratory species subject to collisions with large ships. In 2011, a working group composed of representatives from the maritime industry, the government, non-governmental organizat…	13	9	e0202560
Journal article	2017	Chion, Clément; Lagrois, Dominic; Dupras, Jérôme; Turgeon, Samuel; McQuinn, Ian H.; Michaud, Robert; Ménard, Nadia; Parrott, Lael	Underwater acoustic impacts of shipping management measures: Results from a social-ecological model of boat and whale movements in the St. Lawrence River Estuary (Canada)	Ecological Modelling		10.1016/j.ecolmodel.2017.03.014	https://linkinghub.elsevier.com/retrieve/pii/S0304380016305750	The recovery of whale species at risk requires the implementation of protection measures designed to mitigate the risks posed by various stressors. In the St. Lawrence Estuary (Canada), several whale species are threatened by navigation activities in various ways. Since 2013, seasonal voluntary ship strike mitigation measures, including a speed reduction area (SRA) and a no-go area, were implemen…	354		72-87
Journal article	1999	Lesage, Veronique; Barrette, Cyrille; Kingsley, Michael C. S.; Sjare, Becky	THE EFFECT OF VESSEL NOISE ON THE VOCAL BEHAVIOR OF BELUGAS IN THE ST. LAWRENCE RIVER ESTUARY, CANADA	Marine Mammal Science		10.1111/j.1748-7692.1999.tb00782.x	http://doi.wiley.com/10.1111/j.1748-7692.1999.tb00782.x		15	1	65-84
Journal article	2005	Scheifele, P. M.; Andrew, S.; Cooper, R. A.; Darre, M.; Musiek, F. E.; Max, L.	Indication of a Lombard vocal response in the St. Lawrence River beluga	The Journal of the Acoustical Society of America		10.1121/1.1835508	http://asa.scitation.org/doi/10.1121/1.1835508	Noise pollution is recognized as a potential danger to marine mammals in general, and to the St. Lawrence beluga in particular. One method of determining the impacts of noise on an animal's communication is to observe a natural and repeatable response of the vocal system to variations in noise level. This is accomplished by observing intensity changes in animal vocalizations in response to enviro…	117	3	1486-1492
Journal article	2010	Simard, Y.; Roy, N.; Giard, S.; Gervaise, C.; Conversano, M.; Ménard, N.	Estimating whale density from their whistling activity: Example with St. Lawrence beluga	Applied Acoustics		10.1016/j.apacoust.2010.05.013	https://linkinghub.elsevier.com/retrieve/pii/S0003682X10001209	A passive acoustic method is developed to estimate whale density from their calling activity in a monitored area. The algorithm is applied to a loquacious species, the white whale (Delphinapterus leucas), in Saguenay fjord mouth near Tadoussac, Canada, which is severely affected by shipping noise. Beluga calls were recorded from cabled coastal hydrophones deployed in the basin while the animal de…	71	11	1081-1086
Journal article	2004	Scheifele, P. M.	Effects of Low-Frequency Anthropogenic Noise on the St. Lawrence Beluga Hearing and Communication Processes: a Model	Polarforschung					72	2021-02-03	77-78
Journal article	2020	Giard, Samuel; Simard, Yvan; Roy, Nathalie	Decadal passive acoustics time series of St. Lawrence estuary beluga	The Journal of the Acoustical Society of America		10.1121/10.0000922	http://asa.scitation.org/doi/10.1121/10.0000922	Passive acoustics is used to monitor the threatened St. Lawrence estuary beluga between 2007 and 2017 from a site downstream of the beluga summer habitat. Acoustic metrics of presence and occurrence based on beluga acoustic band activity (BABA) are extracted by a dedicated algorithm adapted for the shipping noise from the St. Lawrence Seaway. A formal optimization process is used to set the algor…	147	3	1874-1884
Journal article	2012	Gervaise, Cédric; Simard, Yvan; Roy, Nathalie; Kinda, Bazile; Ménard, Nadia	Shipping noise in whale habitat: Characteristics, sources, budget, and impact on belugas in Saguenay–St. Lawrence Marine Park hub	The Journal of the Acoustical Society of America		10.1121/1.4728190	http://asa.scitation.org/doi/10.1121/1.4728190	A continuous car ferry line crossing the Saguenay Fjord mouth and traffic from the local whale-watching fleet introduce high levels of shipping noise in the heart of the Saguenay-St. Lawrence Marine Park. To characterize this noise and examine its potential impact on belugas, a 4-hydrophone array was deployed in the area and continuously recorded for five weeks in May-June 2009. The source levels…	132	1	76-89
Journal article	2004	Scheifele, Peter M.	Measurement of Lombard‐like response in the beluga whale	The Journal of the Acoustical Society of America		10.1121/1.4782818	http://asa.scitation.org/doi/10.1121/1.4782818	Noise pollution has become recognized as a potential danger to marine mammals in general, and to the St. Lawrence beluga (Delphinapterus leucas) in particular. One method to determine whether noise is having an effect on an animals auditory ability is to observe a natural and repeatable response of the auditory and vocal systems to varying noise levels. This can be accomplished by observing chang…	115	5	2487-2487
Thesis	2003	Scheifele, P. M.	Investigation into the response of the auditory and acoustic communications systems in the Beluga whale (Delphinapterus leucas) of the St. Lawrence River Estuary to noise, using vocal classification.				https://ui.adsabs.harvard.edu/abs/2003PhDT.......290S/abstract	Noise pollution has only recently become recognized as a potential danger to marine mammals in general, and to the Beluga Whale (Delphinapterus leucas) in particular. These small gregarious Odontocetes make extensive use of sound for social communication and pod cohesion. The St. Lawrence River Estuary is habitat to a small, critically endangered population of about 700 Beluga whales who congrega…				123			University of Connecticut	Mansfield, CT
Journal article	2006	Bédard, C.; Simard, Y.	Automated detection of white whale (Delphinapterus leucas) vocalizations in St. Lawrence estuary and occurrence pattern.	Canadian Acoustics					34	3	84-85
St. Lawrence Beluga - Population Status/Trajectory
Blog post	2014	Racine, S.	Pregnancy tests for the St. Lawrence's Beluga Whales!	InfOceans New Wave			https://inter-l01-uat.dfo-mpo.gc.ca/infoceans/en/infocean/st-lawrences-beluga-whales-take-pregnancy-tests
Report	2014	Gosselin, J-F.; Hammill, M.O.; Mosnier, A.	Summer abundance indices of St. Lawrence Estuary beluga (Delphinapterus leucas) from a photographic survey in 2009 and 28 line transect surveys from 2001 to 2009.					The abundance of beluga whales (Delphinapterus leucas) in the St. Lawrence Estuary was monitored by eight photographic aerial surveys conducted between 1988 and 2009, and twenty-eight visual line transect surveys conducted between 2001 and 2009. Overall, the surveys show no clear trend in abundance since 1988, although there are some indications that the population may have increased slightly fro…			55
Report	2014	Michaud, R.	St. Lawrence Estuary beluga (Delphinapterus leucas) population parameters based on photo-identification surveys, 1989-2012					Between June and October of 1989-2012, small-boat photo-identification surveys (PID) were conducted throughout the St. Lawrence Estuary beluga’s summer range. A total of 1 476 PID surveys were completed for a total of 2 754 encounters, an average of 62 (± 17 SD) surveys and 115 (± 32 SD) encounters per year. Of these encounters, 1 702 and 1 285 where retained to estimate the proportion of grey in…			31			Canadian Science Advisory Secretariat Science Advisory Report
Report	1993	Kingsley, Michael C. S.	Census, trend and status of the St. Lawrence beluga population in 1992				http://citeseerx.ist.psu.edu/viewdoc/download;jsessionid=7EFEB3DBFE1E7B033F25A0A4191D9A79?doi=10.1.1.540.3712&rep=rep1&type=pdf	The Interdepartmental Action Plan for the survival of the Beluga of the St. Lawrence included a research component designed to augment knowledge of the population in such ways as might be appropriate to direct management and protective measures. The research undertaken included aerial surveys to study the size, distribution, and movements of the population. This report presents an estimation of t…			40			Can. Tech. Rep. Fish. Aquat. Sc	Department of Fisheries and Oceans Canada	Mont-Joli, Quebec
Journal article	2015	Marcoux, Marianne; Lesage, Véronique; Thiemann, Gregory W.; Iverson, Sara J.; Ferguson, Steven H.	Age estimation of belugas, <i>Delphinapterus leucas</i> , using fatty acid composition: A promising method	Marine Mammal Science		10.1111/mms.12212	http://doi.wiley.com/10.1111/mms.12212	Data about age-specific survival and mortality rate, as well as life history parameters are essential for studying population demography. However, noninvasive methods for ageing free-ranging marine mammals are generally lacking. Recently, a few studies have highlighted the potential of using fatty acid (FA) composition in blubber biopsy samples to estimate age in some cetaceans. Here, we explore …	31	3	944-962
Journal article	2001	Kingsley, Michael C. S.	Beluga Surveys in the St Lawrence: A Reply to Michaud and Beland	Marine Mammal Science		10.1111/j.1748-7692.2001.tb00995.x	http://doi.wiley.com/10.1111/j.1748-7692.2001.tb00995.x	The author responds to criticisms of his conclusions on trends in the St. Lawrence beluga population made in a 1998 article in this journal.	17	1	213-218
Journal article	2001	Malpine, Donald F.; Daoust, Pierre-Yves; Brodie, Paul F.; Kingsley, Michael C. S.	Additional Evidence for Recent Reproductive Activity in an Aged St. Lawrence Beluga (Delphinapterus Leucas): A Reply to Martineau	Marine Mammal Science		10.1111/j.1748-7692.2001.tb00997.x	http://doi.wiley.com/10.1111/j.1748-7692.2001.tb00997.x	The author responds to criticism of a previous article concerning the reproductive status and health of a beluga drowned in the St. Lawrence Estuary. He presents further proof here that the aged beluga exhibited proof of recent reproductive activity.	17	1	222-226
Journal article	1999	Malpine, Donald F.; Kingsley, Michael C. S.; Daoust, Pierre-Yves	A LACTATING RECORD-AGE ST. LAWRENCE BELUGA (DELPHINAPTERUS LEUCAS)	Marine Mammal Science		10.1111/j.1748-7692.1999.tb00848.x	http://doi.wiley.com/10.1111/j.1748-7692.1999.tb00848.x	The authors present data on the discovery of a female St. Lawrence beluga that appeared to be at least 34 yr of age and in the latter stages of lactation. This report extends the maximum known age of belugas from the St. Lawrence population and shows that some old females in this population remain reproductively active, as in the arctic population of this species.	15	3	854-859
Journal article	1985	Pippard, L.	Status of the St. Lawrence River population of beluga, Delphinapterus leucas	Canadian Field Naturalist					99		438-450
Journal article	1998	Kingsley, Michael C. S.	POPULATION INDEX ESTIMATES FOR THE ST. LAWRENCE BELUGAS, 1973–1995	Marine Mammal Science		10.1111/j.1748-7692.1998.tb00739.x	http://doi.wiley.com/10.1111/j.1748-7692.1998.tb00739.x	Belugas (Delphinapterus leucas) inhabiting the St. Lawrence estuary were freely hunted until 1979 and thereby much reduced in numbers. Inthe late 1970s concerns for their future, and for the effect of contaminants, habitat modification, and marine traffic, became acute, andthey were declared 'Endangered' in 1983. The numerical progress of the population has been monitored since 1973 by continued …	14	3	508-529
Report	2001	Gosselin, J.-F.; Lesage, V.; Robillard, A.	Population index estimate for the beluga of the St Lawrence River Estuary in 2000.								22			Fisheris and Oceans Canada, Maurice-Lamontagne Institute, Tech. Rep. Research Document
Report	1991	Kingsley, Michael C. S.; Hammill, M.O.	PHOTOGRAPHIC CENSUS SURVEYS OF THE ST. LAWRENCE BELUGA POPULATION, 1988 AND 1990				https://waves-vagues.dfo-mpo.gc.ca/Library/134382.pdf	Photographie aerial surveys were flown to estimate the size of the population of belugas inhabiting the estuary of the St Lawrence River, Canada, on 31 August 1988 and on 12 Sept 1990. The surveys were systematic strip transect surveys, with sample coverage over the main area of beluga habitat of 37.5% to 50%, and 12.5% over an extension area. The cameras used were 9"x9" aeriai mapping cameras. T…			28			Can. Tech. Rep. Fish. Aquat. Sc	Department of Fisheries and Oceans Canada	Mont-Joli, Quebec
Journal article	2001	Michaud, Robert; Beland, Pierre	Looking for Trends in the Endangered St. Lawrence Beluga Population a Critique of Kingsley, M.C.S. 1998..: Population Index Estimates for the St. Lawrence Belugas, 1973‐1995. Marine Mammal Science 14:508–530.	Marine Mammal Science		10.1111/j.1748-7692.2001.tb00994.x	http://doi.wiley.com/10.1111/j.1748-7692.2001.tb00994.x	The author criticizes the conclusions drawn by Kingsley (1998) concerning trends in the the St. Lawrence beluga population.	17	1	206-212
Journal article	1984	Reeves, R. R.; Mitchell, E.	Catch history and initial population of white whales (Delphinapterus leucas) in the river and Gulf of St Lawrence, eastern Canada.	Nature Canada					111	1	63-121
Journal article	2002	Kingsley, Michael CS; Gauthier, Isabelle	Visibility of St Lawrence belugas to aerial photography, estimated by direct observation	NAMMCO Scientific Publications		10.7557/3.2848	https://septentrio.uit.no/index.php/NAMMCOSP/article/view/2848	The depleted population of belugas (Delphinapterus leucas) inhabiting the St Lawrence estuary, Canada, was monitored by periodic photographic aerial surveys. In order to correct counts made on aerial survey film and to obtain an estimate of the true size of the population, the diving behaviour and the visibility from the air of these animals was studied. A Secchi-disk turbidity survey in the belu…	4		259
Journal article	1998	Lesage, V.; Kingsley, Michael C. S.	Updated Status of the St Lawrence River Population of the Beluga, Delphinapterus leucas	Canadian Field Naturalist				The Beluga, Delphinapterus leucas, in the St. Lawrence Estuary is at the southern limit of the distribution of this species. The large distances separating this population from northern Belugas, its low genetic variability, and the rarity of Beluga sightings outside their normal range in the Gulf, suggest that it is isolated from its northern conspecifics. Over-exploitation and attempted extermin…	112	1	98-114
Journal article	2015	Mosnier, A.; Doniol-Valcroze, T.; Gosselin, J.-F.; Lesage, V.; Measures, L.N.; Hammill, M.O.	Insights into processes of population decline using an integrated population model: The case of the St. Lawrence Estuary beluga (Delphinapterus leucas)	Ecological Modelling		10.1016/j.ecolmodel.2015.07.006	https://linkinghub.elsevier.com/retrieve/pii/S0304380015003129	Integrated population models combine data from several sources into a single model to allow the simultaneous estimation of demographic parameters and the prediction of population trajectories. They are especially useful when survey data alone are insufficient to estimate precise vital rates and abundance, and to understand mechanisms of population growth and decline. The St. Lawrence Estuary (SLE…	314		15-31
St. Lawrence Beluga - Reduced prey
Report	2014	Lesage, V.	Trends in the trophic ecology of St. Lawrence beluga (Delphinapterus leucas) over the period 1988-2012, based on stable isotope analysis					The paucity of information related to the trophic ecology and diet of St. Lawrence Estuary (SLE) beluga limits our understanding of contaminant pathways, and precludes the identification of period, region and prey species likely to be the most important for their successful reproduction and survival. We used a combination of gastro-intestinal data and stable C and N isotope ratios in beluga muscl…			29			Canadian Science Advisory Secretariat Science Advisory Report
Report	2014	Plourde, S.; Galbraith, P. S.; Lesage, V.; Grégoire, F.; Bourdages, H.; Gosselin, J.-F.; McQuinn, I.H.; Scarratt, M.	Ecosystem perspective on changes and anomalies in the Gulf of St. Lawrence: a context in support of the management of the St. Lawrence beluga whale population					The St. Lawrence beluga whale (Delphinapterus leucas) population is at the southernmost limit of the species. In spite of > 30 years protection, there is little or no indication that the population is recovering. The main objective of this study is to characterize long-term changes in the environmental conditions likely to have an impact on beluga population habitat at the scale of the Gulf of St…			34			Canadian Science Advisory Secretariat Science Advisory Report
Journal article	2017	Couillard, Catherine M; Ouellet, P; Verreault, G; Senneville, S; St-Onge-Drouin, S; Lefaivre, D	Effect of decadal changes in freshwater flows and temperature on the larvae of two forage fish species in coastal nurseries of the St. Lawrence Estuary	Estuaries and Coasts		10.1007/s12237-016-0144-7		Since 2002, the abundance of larvae of rainbow smelt (Osmerus mordax) and Atlantic herring (Clupea harengus) has been monitored in July in coastal nurseries (Anse Ste.-Anne (ASA) and Banc de Rivière-du-Loup (BRL)) in the Middle St. Lawrence Estuary (MSLE), Canada. The two species are spatiotemporally segregated, with smelt larvae being more abundant at the upstream, less saline site (ASA) and hav…	40	1	268-285
Journal article	1995	Measures, L. N.; Béland, P.; Martineau, D.; Guise, S. De	Helminths of an endangered population of belugas, <i>Delphinapterus leucas</i> , in the St. Lawrence estuary, Canada	Canadian Journal of Zoology		10.1139/z95-165	http://www.nrcresearchpress.com/doi/10.1139/z95-165	Helminths were identified in 38 belugas, Delphinapterus leucas, stranded in the St. Lawrence estuary and Gulf of St. Lawrence during 1984–1993. These helminth species were Anisakis simplex, Contracaecinea sp., Pseudoterranova sp., Stenurus arctomarinus, Pharurus pallasii, Halocercus taurica (new host record), Halocercus monoceris (new host record), Hadwenius seymouri, Diphyllobothrium sp., and Bo…	73	8	1402-1409
Journal article	2020	Lesage, Véronique; Lair, Stéphane; Turgeon, Samuel; Béland, Pierre	Diet of St. Lawrence Estuary Beluga (<i>Delphinapterus leucas</i>) in a changing ecosystem	The Canadian Field-Naturalist		10.22621/cfn.v134i1.2421	https://www.canadianfieldnaturalist.ca/index.php/cfn/article/view/2421	Ecosystems and community structure fluctuate over time as a result of natural and anthropogenic factors that may affect prey availability and population dynamics. Most of what we know about St. Lawrence Estuary (SLE) Beluga (Delphinapterus leucas) diet comes from stomach contents collected 80 years ago mainly from a hunting site that Beluga no longer use. How reflective these data are of Beluga d…	134	1	21-35
Book	2008	Savaria, J. Y.; Cantin, G.; Bossé, L.; Bailey, R.; Provencher, L.; Proust, F.	Proceedings from a Scientific Workshop on Marine Mammals, Their Habitats and Food Resources, Held in Mont-Joli (Quebec) from April 3 to 7, 2000, Within the Context of the St. Lawrence Estuary Marine Protected Area Project									49			Fisheries and Oceans Canada	Mont-Joli, Quebec
St. Lawrence Beluga - Stress/Disease
Report	2014	Lair, S.; Martineau, D.; Measures, L.	Causes of mortality in St. Lawrence Estuary beluga (Delphinapterus leuca) from 1983 to 2012					Between 1983 and 2012 a total of 469 beluga carcasses from the St. Lawrence Estuary (SLE) population were reported. Standard necropsies were conducted on a total of 222 of these carcasses (117 females, 103 males and two intersexes) using an evolving but relatively uniform protocol. Primary causes of death were determined for each beluga. Age was estimated by counting growth layer groups (GLGs) of…			41			Canadian Science Advisory Secretariat Science Advisory Report
Report	2014	Lesage, V.; Measures, L.; Mosnier, A.; Lair, S.; Michaud, R.; Béland, P.	Mortality patterns in St. Lawrence Estuary beluga (Delphinapterus leucas), inferred from the carcass recovery data, 1983-2012					A total of 469 beluga was found dead in the Estuary or Gulf of St. Lawrence between 1983 and 2012. The number of cases reported varied among years, with a median of 15 beluga annually. Beluga deaths were mainly reported in the St. Lawrence Estuary (SLE), between April and November, and peaked in May to August. Over the first 24 years of the study period, newborn deaths varied from 0 to 3 beluga p…			27			Canadian Science Advisory Secretariat Science Response
Journal article	2015	LAIR, STÉPHANE; Measures, Lena; Martineau, Daniel	Pathologic Findings and Trends in Mortality in the Beluga (Delphinapterus leucas) Population of the St Lawrence Estuary, Quebec, Canada, From 1983 to 2012	Veterinary pathology		10.1177/0300985815604726		An isolated population of beluga (Delphinapterus leucas) inhabits the St Lawrence Estuary, Quebec, Canada. This population has failed to recover despite the prohibition of hunting >30 years ago, suggesting the presence of other limiting factors. The authors summarize the reported causes of death and propose risk factors to explain the lack of recovery of this population. From 1983 to 2012, a tota…	53
Book section	2018	Schloss, Irene; Archambault, Philippe; Beauchesne, David; Cusson, Mathieu; Ferreyra, Gustavo; Levasseur, Maurice; Pelletier, Emilien; St-Louis, Richard; Tremblay, Réjean	Cumulative potential impacts of the stress factors associated with human activities on the St. Lawrence marine ecosystem		978-2-9817103-0-7			Cumulative potential impacts of the stress factors associated with human activities on the St. Lawrence marine ecosystem BY Photo: Pixabay 135 / 134 /-Human activities deriving from the occupation of the shores of the Estuary and the Gulf of St. Lawrence induce stress factors for marine organisms.-The effects on the environment and the organisms of the interaction between these stressors (for ins…			132-165
Journal article	2002	Martineau, D	St. Lawrence Beluga Whales the River Sweepers?	Environmental Health Perspectives		10.1289/ehp.110-a562b	https://ehp.niehs.nih.gov/doi/10.1289/ehp.110-a562b		110	10	b
Journal article	2001	Martineau, Daniel	Reproductive Status of a Beluga from the St. Lawrence Estuary	Marine Mammal Science		10.1111/j.1748-7692.2001.tb00996.x	http://doi.wiley.com/10.1111/j.1748-7692.2001.tb00996.x		17	1	219-222
Journal article	2011	Bossart, G. D.	Marine Mammals as Sentinel Species for Oceans and Human Health	Veterinary Pathology		10.1177/0300985810388525	http://journals.sagepub.com/doi/10.1177/0300985810388525	The long-term consequences of climate change and potential environmental degradation are likely to include aspects of disease emergence in marine plants and animals. In turn, these emerging diseases may have epizootic potential, zoonotic implications, and a complex pathogenesis involving other cofactors such as anthropogenic contaminant burden, genetics, and immunologic dysfunction. The concept o…	48	3	676-690
Journal article	1995	Béland, P.; De Guise, S.; Lagacé, A.	More About Carcinogens and Tumors	Veterinary Pathology		10.1177/030098589503200223	http://journals.sagepub.com/doi/10.1177/030098589503200223		32	2	212-213
Journal article	2018	Iqbal, A; Measures, L; Lair, S; Dixon, B	Toxoplasma gondii infection in stranded St. Lawrence Estuary beluga Delphinapterus leucas in Quebec, Canada	Diseases of Aquatic Organisms		10.3354/dao03262	https://www.int-res.com/abstracts/dao/v130/n3/p165-175/		130	3	165-175
Journal article	1994	DeGuise, S.; Lagace, A.; Beland, P.	TUMORS IN ST-LAWRENCE BELUGA WHALES (DELPHINAPTERUS-LEUCAS)	Veterinary Pathology				A population of 450-500 belugas (Delphinapterus leucas) resides in the polluted estuary of the St. Lawrence River. Stranded carcasses of this endangered population were recovered and necropsied. High concentrations of organochlorines, heavy metals, and benzo-a-pyrene exposure were demonstrated in tissues of these whales. Between 1988 and 1990, 21 tumors were found in 12 out of 24 carcasses. Among…	31	4	444-449
Journal article	1985	Martineau, D.; Lagace, A.; Masse, R.; Morin, M.; Beland, P.	TRANSITIONAL CELL-CARCINOMA OF THE URINARY-BLADDER IN A BELUGA WHALE (DELPHINAPTERUS-LEUCAS)	Canadian Veterinary Journal-Revue Veterinaire Canadienne					26	10	297-302
Journal article	2000	Mikaelian, I; Boisclair, J; Dubey, Jp; Kennedy, S; Martineau, D	Toxoplasmosis in Beluga Whales (Delphinapterus leucas) from the St Lawrence Estuary: Two Case Reportsand a Serological Survey	Journal of Comparative Pathology		10.1053/jcpa.1999.0341	https://linkinghub.elsevier.com/retrieve/pii/S0021997599903419		122	1	73-76
Journal article	1988	Martineau, D.; Lagacé, A.; Béland, P.; Higgins, R.; Armstrong, D.; Shugart, L.R.	Pathology of stranded beluga whales (Delphinapterus leucas) from the St. Lawrence Estuary, Québec, Canada	Journal of Comparative Pathology		10.1016/0021-9975(88)90038-2	https://linkinghub.elsevier.com/retrieve/pii/0021997588900382		98	3	287-310
Journal article	1994	Martineau, D.; De Guise, S.; Fournier, M.; Shugart, L.; Girard, C.; Lagacé, A.; Béland, P.	Pathology and toxicology of beluga whales from the St. Lawrence Estuary, Quebec, Canada. Past, present and future	Science of The Total Environment		10.1016/0048-9697(94)90088-4	https://linkinghub.elsevier.com/retrieve/pii/0048969794900884	An indigenous population of 450-500 beluga whales (Delphinapterus leucas) inhabiting the St. Lawrence Estuary has been exposed chronically for more than 50 years to a complex mixture of industrial pollutants including organochlorinated compounds (OC), polycyclic aromatic hydrocarbons (PAH) and heavy metals. From 1983 to 1990, we have necropsied 45 well preserved carcasses out of a total of 120 be…	154	2021-02-03	201-215
Journal article	2013	Truchon, Marie-Hélène; Measures, Lena; L’Hérault, Vincent; Brêthes, Jean-Claude; Galbraith, Peter S.; Harvey, Michel; Lessard, Sylvie; Starr, Michel; Lecomte, Nicolas	Marine Mammal Strandings and Environmental Changes: A 15-Year Study in the St. Lawrence Ecosystem	PLoS ONE		10.1371/journal.pone.0059311	https://dx.plos.org/10.1371/journal.pone.0059311	Understanding the effects of climatic variability on marine mammals is challenging due to the complexity of ecological interactions. We used general linear models to analyze a 15-year database documenting marine mammal strandings (1994 2008; n=1,193) and nine environmental parameters known to affect marine mammal survival, from regional (sea ice) to continental scales (North Atlantic Oscillation,…	8	3	e59311
Journal article	2006	Newman, S. J.; Smith, S. A.	Marine Mammal Neoplasia: A Review	Veterinary Pathology		10.1354/vp.43-6-865	http://journals.sagepub.com/doi/10.1354/vp.43-6-865	A review of the published literature indicates that marine mammal neoplasia includes the types and distributions of tumors seen in domestic species. A routine collection of samples from marine mammal species is hampered, and, hence, the literature is principally composed of reports from early whaling expeditions, captive zoo mammals, and epizootics that affect larger numbers of animals from a spe…	43	6	865-880
Journal article	1993	De Guise, Sylvain; Lagacé, André; Girard, Christiane; Béland, Pierre	Intramuscular <i>Sarcocystis</i> in Two Beluga Whales and an Atlantic White-Sided Dolphin from the St. Lawrence Estuary, Quebec, Canada	Journal of Veterinary Diagnostic Investigation		10.1177/104063879300500231	http://journals.sagepub.com/doi/10.1177/104063879300500231		5	2	296-300
Journal article	2000	Mikaelian, Igor; Labelle, Philippe; Doré, Monique; Martineau, Daniel	Fibroleiomyomas of the Tubular Genitalia in Female Beluga Whales	Journal of Veterinary Diagnostic Investigation		10.1177/104063870001200414	http://journals.sagepub.com/doi/10.1177/104063870001200414	Fibroleiomyomas of the tubular genitalia were diagnosed in 6 of 9 adult female beluga whales from the St. Lawrence estuary, Quebec, Canada. These tumors were located in the vagina (6 of 6), the cervix (2 of 6), and the uterus (1 of 6). Endogenous hormones or xeno-estrogens may be implicated in the occurrence of these tumors.	12	4	371-374
Journal article	2002	Martineau, Daniel; Lemberger, Karin; Dallaire, André; Labelle, Philippe; Lipscomb, Thomas P; Michel, Pascal; Mikaelian, Igor	Cancer in wildlife, a case study: beluga from the St. Lawrence estuary, Québec, Canada.	Environmental Health Perspectives		10.1289/ehp.02110285	https://ehp.niehs.nih.gov/doi/10.1289/ehp.02110285	A population of approximately 650 beluga (Delphinapterus leucas) inhabits a short segment of the St. Lawrence estuary (SLE). Over 17 years (1983–1999), we have examined 129 (or 49%) of 263 SLE beluga carcasses reported stranded. The major primary causes of death were respiratory and gastrointestinal infections with metazoan parasites (22%), cancer (18%), and bacterial, viral, and protozoan infect…	110	3	285-292
Journal article	2002	Theriault, Gilles; Gibbs, Graham; Tremblay, Claude	Cancer in belugas from the St. Lawrence estuary.	Environmental Health Perspectives		10.1289/ehp.110-a562a	https://ehp.niehs.nih.gov/doi/10.1289/ehp.110-a562a		110	10	a
Journal article	1999	Martineau, Daniel; Lair, Stephanie; De Guise, Sylvain; P. Liscomb, Thomas; Beland, Pierre	Cancer in beluga whales from the St Lawrence Estuary, Quebec, Canada: A potential biomarker of environmental contaminatio	J. Cetacean Res. Manage.		10.47536/jcrm.v1i1.252	https://journal.iwc.int/index.php/jcrm/article/view/252	A population of approximately 500 white whales (Delphinapterus leui us) inhabits a short stretch of the St Lawrence Estuary which drains one of the most industrialised areas of the world. Over a 12-year period (1983-1994), 73 carcasses out of 175 beluga2 whales reported stranded on the St Lawrence Estuary shoreline have been examined. Of these 73 carcasses, 14(1 9<>;) were affected by 15 differen…	1	1	249-265
Journal article	2003	Hammill, Mike O; Lesage, Véronique; Kingsley, Michael C S	Cancer in beluga from the St. Lawrence estuary.	Environmental Health Perspectives		10.1289/ehp.111-a77c	https://ehp.niehs.nih.gov/doi/10.1289/ehp.111-a77c		111	2	b
Journal article	2019		Agreement between Repeated Subjective Visual Evaluations of Body Condition of St. Lawrence Beluga Whale (Delphinapterus leucas) Carcasses Using a Visual Analog Scale	Journal of Wildlife Diseases		10.7589/2018-04-105	https://bioone.org/journals/journal-of-wildlife-diseases/volume-55/issue-2/2018-04-105/Agreement-between-Repeated-Subjective-Visual-Evaluations-of-Body-Condition-of/10.7589/2018-04-105.full	The determination of body condition is a fundamental component of an evaluation during postmortem examinations of cetaceans. Three veterinarians experienced in beluga post-mortem techniques subjectively evaluated 62 carcasses of beluga whales (Delphinapterus leucas) in duplicate, using a visual analog scale. The result of evaluation and scoring was repeatable in cachectic animals and animals in v…	55	2	518
Journal article	2003	Mikaelian, I.; Labelle, P.; Kopal, M.; De Guise, S.; Martineau, D.	Adenomatous Hyperplasia of the Thyroid Gland in Beluga Whales ( <i>Delphinapterus leucas</i> ) from the St. Lawrence Estuary and Hudson Bay, Quebec, Canada	Veterinary Pathology		10.1354/vp.40-6-698	http://journals.sagepub.com/doi/10.1354/vp.40-6-698	We evaluated thyroid gland lesions in beluga whales (Delphinapterus leucas) from the St. Lawrence Estuary (n = 16) and Hudson Bay (n = 14). Follicular cysts and nodules of adenomatous hyperplasia of the thyroid gland were found in eight and nine adults from the St. Lawrence Estuary (n = 10), respectively, and in four and six adults from Hudson Bay (n = 14), respectively. The total volume of the l…	40	6	698-703
Journal article	1991	Girard, Christiane; Lagacé, André; Higgins, Robert; Béland, Pierre	Adenocarcinoma of the Salivary Gland in a Beluga Whale ( <i>Delphinapterus Leucas</i> )	Journal of Veterinary Diagnostic Investigation		10.1177/104063879100300317	http://journals.sagepub.com/doi/10.1177/104063879100300317		3	3	264-265
Book section	2003	Brousseau, P.; DeGuise, S.; Voccia, I.; Ruby, S.; Fournier, M.	14 Immune status of St. Lawrence estuary beluga whales	Toxicology of marine mammals (New Perspectives: Toxicology and the Environment)							381-403				Taylor and Francis	London, United Kingdom
Book section	2003	Martineau, D.; Mikaelian, I.; Lapointe, J.-M.; Labelle, P.; Higgins, R.	13 Pathology of cetaceans. A case study: Beluga from the St. Lawrence estuary	Toxicology of marine mammals (New Perspectives: Toxicology and the Environment)							333-380				Taylor and Francis	London, United Kingdom
Journal article	1995	De Guise, S.; Lagacé, A.; Béland, P.; Girard, C.; Higgins, R.	Non-neoplastic lesions in beluga whales (Delphinapterus leucas) and other marine mammals from the St lawrence estuary	Journal of Comparative Pathology		10.1016/S0021-9975(05)80079-9	https://linkinghub.elsevier.com/retrieve/pii/S0021997505800799	In a 3-year (1988-1990) pathological study, 24 carcasses of beluga whales from the St Lawrence Estuary, Québec, Canada, showed numerous severe lesions, many of which had never been reported in cetaceans. The most common lesions were found in the digestive tract (21 animals) and consisted mainly of periodontitis and of erosions and ulcers in the oesophagus and the first two gastric compartments. P…	112	3	257-271
Journal article	1995	Martineau, D.; Lair, S.; De Guise, S.; Béland, P.	Intestinal adenocarcinomas in two beluga whales (Delphinapterus leucas) from the estuary of the St. Lawrence River	The Canadian Veterinary Journal = La Revue Veterinaire Canadienne					36	9	563-565
Journal article	2001	Mikaelian, I.; Lapointe, J.-M.; Labelle, P.; Higgins, R.; Paradis, M.; Martineau, D.	Dermatophilus-like infection in beluga whales, <i>Delphinapterus leucas</i> , from the St. Lawrence estuary	Veterinary Dermatology		10.1046/j.1365-3164.2001.00216.x	http://doi.wiley.com/10.1046/j.1365-3164.2001.00216.x	Six beluga whales (Delphinapterus leucas) found dead on the shores of the St. Lawrence estuary had multiple slightly depressed greyish round areas randomly distributed over the whole body. Histologically, the surface of these areas was covered with a thick layer of Dermatophilus-like organisms which invaded the stratum corneum. The underlying stratum spinosum had marked spongiosis and vacuolar de…	12	1	59-62
Journal article	1998	Lair, S.; De Guise, S.; Martineau, D.	Uterine Adenocarcinoma with Abdominal Carcinomatosis in a Beluga Whale	Journal of Wildlife Diseases		10.7589/0090-3558-34.2.373	http://www.jwildlifedis.org/doi/10.7589/0090-3558-34.2.373	A case of uterine adenocarcinoma is reported in a 26-yr-old, free-ranging beluga whale (Delphinapterus leucas) from the St. Lawrence estuary (Quebec, Canada). This neoplasm appeared as a segmental stenotic thickening of the left uterine horn composed of well differentiated, but disorganized and infiltrative, glandular structures surrounded by an extensive scirrhous stroma. Abdominal carcinomatosi…	34	2	373-376
Journal article	2003	Houde, M.; Measures, L.; Pettorelli, J. H.	Lungworm (Pharurus pallasii: Metastrongyloidea: Pseudaliidae) infection in the endangered St. Lawrence beluga whale (Delphinapterus leucas)	Canadian Journal of Zoology				Eighty-eight percent of adult beluga whales, Delphinapterus leucas (agegtoreq7 years; n=32), and 72% of juveniles (1 yeargtoreqage<7 years; n=11) were infected with the cranial sinus nematode Pharurus pallasii. No fetuses or young of the year (ageltoreq1 year; n=9) were infected. The mean intensity of infection was 419 (range 2-2042) in adults and 179 (range 1-500) in juveniles. There was no diff…	81	3	543-551
Journal article	1999	Murray, Brent W.; Michaud, Robert; White, Bradley N.	Allelic and haplotype variation of major histocompatibility complex class II DRB1 and DQB loci in the St Lawrence beluga (Delphinapterus leucas)	Molecular Ecology		10.1046/j.1365-294x.1999.00670.x	http://doi.wiley.com/10.1046/j.1365-294x.1999.00670.x	In order to assess levels of major histocompatibility complex (Mhc) variation within the St Lawrence beluga (Delphinapterus leucas) the variation at the beluga Mhc DRB1 class II locus was assessed by single-strand conformation polymorphism (SSCP) analysis of the peptide-binding region for 313 whales collected from 13 sampling locations across North America. In addition, samples from west Greenlan…	8	7	1127-1139
Journal article	1999	Mikaelian, I.; Tremblay, M-P.; Montpetit, C.; Tessaro, S. V.; Cho, H. J.; House, C.; Measures, L.; Martineau, D.	Seroprevalence of selected viral infections in a population of beluga whales ( <i>Delphinapterus leucas</i> ) in Canada	Veterinary Record		10.1136/vr.144.2.50	http://doi.wiley.com/10.1136/vr.144.2.50	The authors discuss the research conducted on beluga whales found dead onshore in the St. Lawrence estuary and Saguenay fjord in Canada. Serological data are presented on the diseases discovered in the 116 whales examined between 1982 and 1997.	144	2	50-51
Conference paper	1993	DeGuise, S.; Martineau, D.; Beland, P.; Fournier, M.	Pathology and toxicology of St. Lawrence beluga whales (Delphinapterus leucas)	Ecological risk assessment: Lessons learned?. Abstract book			https://web-b-ebscohost-com.offcampus.lib.washington.edu/ehost/detail/detail?vid=0&sid=483a38d9-af36-4e16-a7f9-143e7f55d0fe%40sessionmgr102&bdata=JnNpdGU9ZWhvc3QtbGl2ZQ%3d%3d#AN=0070000408&db=fzh	The St. Lawrence Estuary, which drains a highly industrialized area, is home of an isolated population of 500 beluga whales. From 5,000 individuals at the beginning of the century, the population has been heavily hunted and dropped to 1,000 animals when hunting stopped. Since the population continued to decline, pathological and toxicological research started a decade ago to investigate the healt…			89-89				Society of Environmental Toxicology and Chemistry	Houston, Texas
Journal article	1999	Mikaelian, I.; Labelle, P.; Doré, M.; Martineau, D.	Metastatic mammary adenocarcinomas in two beluga whales ( <i>Delphinapterus leucas</i> ) from the St Lawrence Estuary, Canada	Veterinary Record		10.1136/vr.145.25.738	http://doi.wiley.com/10.1136/vr.145.25.738	The authors discuss the pathological and immunohistochemical findings in two beluga whales from the St. Lawrence Estuary with mammary adenocarcinoma. One was an adult female, more than 26 years old. The right mammary gland was enlarged and totally replaced by many one to five centimeter diameter white nodules with a firm texture. A mass of about 10 cm was found in the lateral ventricle of the lef…	145	25	738-739
Conference paper	1993	De Guise, S.; Fournier, M.; Martineau, D.; Beland, P.	Immunotoxicological evaluation of St. Lawrence beluga whales (Delphinapterus leucas)	Ecological risk assessment: Lessons learned?. Abstract book			https://web-b-ebscohost-com.offcampus.lib.washington.edu/ehost/detail/detail?vid=0&sid=483a38d9-af36-4e16-a7f9-143e7f55d0fe%40sessionmgr102&bdata=JnNpdGU9ZWhvc3QtbGl2ZQ%3d%3d#AN=0070000408&db=fzh	An isolated population of beluga whales living in the St. Lawrence Estuary has dwindled from an estimated 5,000 individuals at the beginning of the century to around 500. They have been extensively studied for the last decade. The authors performed the determination of the toxic body burden as well as the environmental fate. The animals present a high level of contamination mostly with organohalo…			287-287				Society of Environmental Toxicology and Chemistry	Houston, Texas
Journal article	2015	Bellehumeur, Christian; Lair, Stéphane; Romero, Carlos H.; Provost, Chantale; Nielsen, Ole; Gagnon, Carl A.	Identification of a Novel Herpesvirus Associated with a Penile Proliferative Lesion in a Beluga ( <i>Delphinapterus leucas</i> )	Journal of Wildlife Diseases		10.7589/2013-11-293	http://www.bioone.org/doi/10.7589/2013-11-293	The article reports that a novel herpesvirus has been found on the penile proliferative lesion of a beluga or Delphinapterus leucas. Topics discussed include aspiration pneumonia as the possible cause of the beluga's death, the similarity of the herpesvirus found on the animal with alphaherpesvirus and the evidence that the virus is endemic in the beluga population found at St. Lawrence Estuary i…	51	1	244-249
Thesis	2016	Arif, S.	How are genetic factors influencing cancer susceptibility and mortality patterns in the St. Lawrence beluga?				http://library2.smu.ca/handle/01/26702#.YFJvha9Kg2w	The purpose of this project was to understand how genetic factors may be influencing cancer susceptibility and mortality patterns in the St. Lawrence beluga. To assess if variation along candidate genes are influencing cancer susceptibility, I designed primers for the amplification of the p53 gene, and microsatellite regions along seven additional genes: p16, Rb1, BRCA1, BRCA2, PTEN, HPSE2, and F…				115			Saint Mary's University	Halifax, Nova Scotia, Canada
Journal article	1994	Patenaude, N. J.; Quinn, J. S.; Beland, P.; Kingsley, M.; White, B. N.	Genetic variation of the St. Lawrence beluga whale population assessed by DNA fingerprinting	Molecular Ecology		10.1111/j.1365-294X.1994.tb00077.x	http://doi.wiley.com/10.1111/j.1365-294X.1994.tb00077.x	Recent surveys suggest that the endangered St, Lawrence beluga (Delphinapterus leucas) population is not recovering significantly despite 20 years of protection. Dead individuals that have been autopsied show high levels of tumours and infections. This situation could be a result of pollution, loss of genetic variation, inbreeding depression or a combination of these factors. Analyses of DNA fing…	3	4	375-381
Hector's dolphin - Climate change/Anthropogenic
Journal article	1990	Buckland, SJ; Hannah, DJ; Taucher, JA; Slooten, E; Dawson, S	Polychlorinated dibenzo-p-dioxins and dibenzofurans in New Zealand's Hector's dolphin	Chemosphere		10.1016/0045-6535(90)90217-H			20	2021-07-09	1035-1042
Journal article	2000	Stone, Gregory S; Yoshinaga, Austen	Hector's dolphin Cephalorhynchus hectori calf mortalities may indicate new risks from boat traffic and habituation	Pacific Conservation Biology		10.1071/PC000162		Two Hector's Dolphin calves Cephalorhynchus hectori were killed by probable boat collision in 1999, indicating that boat strikes may pose more of a threat to the species than previously thought. When discovered, one dead calf was still tended by its mother. After recovery, both animals were necropsied with trauma from boat strikes as the most likely cause of death. These deaths are discussed in t…	6	2	162-170
Presentation	2005	Slooten, Elisabeth; Moore, Antoni; Rodda, Judith	Hector’s Dolphin Database for a South Island Bay: a new tool for the research toolbox?				http://hdl.handle.net/10523/805	Hector’s dolphins are an endemic species found along coasts in both the North and South Islands in New Zealand. They are primarily observed along the coast within 5 nautical miles (nm) of the shore. Surveys conducted during the past 5 years have calculated the South Island abundance to be 7,268 (Dawson, Slooten, DuFresne et al. 2004; Slooten, Dawson & Rayment 2004). Hector’s dolphins live to be a…								Dunedin, New Zealand
Thesis	2005	Green, E. L.	Population biology and the effects of tourism on Hector's Dolphins (Cephalorhynchus hectori), in Porpoise Bay, NZ				http://hdl.handle.net/10523/9056	A small population of Hector's dolphins (Cephalorhynchus hectori) in Porpoise Bay, New Zealand, attracts a single commercial dolphin-watch vessel as well as an increasing number of swimmers who enter the water from the shore. The aims of this study were to collect data on the effects ofthis tourism, estimate abundance ofthe population, quantify distribution and alongshore range, and provide recom…				144			Otago University	Dunedin, New Zealand
Journal article	2008	Slooten, E.; Dawson, S. M.	Sustainable Levels of Human Impact for Hector's Dolphin	The Open Conservation Biology Journal		10.2174/1874839200802010037	http://benthamopen.com/ABSTRACT/TOCONSBJ-2-37	Hector’s dolphin is endemic to New Zealand, and listed as endangered on the IUCN Red List and equivalent New Zealand list of threatened species. The main threat to the species is entanglement in fishing gear, in particular gillnets. The Potential Biological Removal (PBR) method developed by the US National Marine Fisheries Service is a commonly used standard for determining a level of bycatch for…	2	1	37-43
Presentation	2010	Martinez, E.; Orams, M. B.; Stockin, K. A.	Effects of vessel interactions on the behaviour of Hector’s dolphins in Akaroa Harbour, Banks Peninsula, New Zealand				https://www.researchgate.net/profile/Emmanuelle-Martinez/publication/260365940_Effects_of_vessel_interactions_on_the_behaviour_of_Hector%27s_dolphins_in_Akaroa_Harbour_Banks_Peninsula_New_Zealand/links/0c960530ea3198bb62000000/Effects-of-vessel-interactions-on-the-behaviour-of-Hectors-dolphins-in-Akaroa-Harbour-Banks-Peninsula-New-Zealand.pdf									Cadiz, Spain
Thesis	1997	Bejder, L.	Behaviour, ecology and impact of tourism on Hector's dolphins (Cephalorhynchus hectori) in Porpoise Bay, New Zealand					Few studies have integrated research on the ecology and population biology of dolphins with studies of the potential impacts on them. The aims of this study were to: 1) photographically identify the population of Hector's dolphins (Cephalorhynchus hectori) using Porpoise Bay and estimate population size; 2) present a method for testing association patterns of social mammals; 3) assess the social …				111			University of Otago	Dunedin, New Zealand
Journal article	2020	Booth, Cormac G.; Sinclair, Rachael R.; Harwood, John	Methods for Monitoring for the Population Consequences of Disturbance in Marine Mammals: A Review	Frontiers in Marine Science		10.3389/fmars.2020.00115	https://www.frontiersin.org/article/10.3389/fmars.2020.00115/full	Assessing the non-lethal effects of disturbance and their population-level consequences is a signiﬁcant ecological and conservation challenge, because it requires extensive baseline knowledge of behavioral patterns, life-history and demography. However, for many marine mammal populations, this knowledge is currently lacking and it may take decades to ﬁll the gaps. During this time, undetected pop…	7		115
document	2019	Lucke, K.; Clement, D.; Todd, V.; Williamson, L.; Johnston, O.; Floerl, L.; Cox, S. P.; Todd, I.; McPherson, C.	Potential Impacts of Petroleum and Mineral Exploration and Production on Hector’s and Māui Dolphins					The North Island population of Hector's dolphins (Cephalorhynchus hectori) is formally described as a subspecies, the Māui dolphin (Cephalorhynchus hectori maui). Both Hector’s and Māui dolphins, are endemic to New Zealand waters, where animals are exposed to a range of human (anthropogenic) and non-human-induced threats. To better protect these species, the Department of Conservation (DOC) and F…							JASCO Applied Sciences, Cawthorn Institute
Thesis	2010	Martinez, E.	Responses of South Island Hector's dolphins (Cephalorhynchus hectori hectori) to vessel activity (including tourism operations) in Akaroa Harbour, Banks Peninsula, New Zealand.				https://mro.massey.ac.nz/handle/10179/2303	For over 25 years, tour operators have been undertaking view and swim-with-dolphin trips in Akaroa Harbour off Banks Peninsula, east coast South Island, New Zealand. Following the international exponential growth in the commercial dolphin-based tourism industry, Akaroa Harbour is now a key eco-tourism destination in New Zealand with 32 daily permitted trips targeting Hector’s dolphin (Cephalorhyn…				31			Massey University	Palmerston North, New Zealand
Report	2001	Nichols, C.; Stone, G.; Hutt, A.; Brown, J.; Yoshinaga, A.	Observations of interactions between Hector's dolphins (Cephalorhynchus hectori), boats and people at Akaroa Harbour, New Zealand.				https://www.doc.govt.nz/documents/science-and-technical/Sfc178.pdf	Theodolite tracking observations of Hector's dolphins (Cephalorhynchus hectori) and boat activity were conducted from cliff-side 30 m above sea level within a defined study site in Akaroa Harbour, South Island, New Zealand from 5 January 1999-12 February 1999 and from 6 January 2000-14 February 2000. Data were compiled and analysed to assess whether there were changes in dolphin distribution, or …			49			Science for Conservation	Department of Conservation	Wellington, N.Z.
Book section	2017	Dolman, S. J.; Moore, M. J.	Welfare implications of cetacean bycatch and entanglements	Marine Mammal Welfare							41-65				Springer
Journal article	2009	Rayment, William; Webster, Trudi	Observations of Hector's dolphins ( <i>Cephalorhynchus hectori</i> ) associating with inshore fishing trawlers at Banks Peninsula, New Zealand	New Zealand Journal of Marine and Freshwater Research		10.1080/00288330909510049	http://www.tandfonline.com/doi/abs/10.1080/00288330909510049	Fishing activities have the potential to alter the behaviour of cetaceans and pose a threat through bycatch. We present observations concerning the influence of inshore trawling on group size and behaviour of Hector's dolphins (Cephalorhynchus hectori) at Banks Peninsula, New Zealand, made during photo-ID surveys from 2003 to 2007. Aggregations of dolphins, typically involved in what we assumed t…	43	4	911-916
Journal article	2007	Middleton, Daj; Starr, Pj; Gilbert, Dj	Modelling the impact of fisheries bycatch on Hector’s dolphin: comment on Slooten (2007)	Endangered Species Research		10.3354/esr00057	http://www.int-res.com/abstracts/esr/v3/n3/p331-334/		3		331-334
Journal article	2005	Dawson, S. M.; Slooten, E.	Management of gillnet bycatch of cetaceans in New Zealand	Journal of Cetacean Research and Management				Bycatch of dolphins in inshore gillnets first attracted scientific and management attention in New Zealand in the 1980s. During 1984-88, 50-150 dusky dolphins were killed each year at Kaikoura in gillnets set at the surface to catch bait for rock lobster. At the same time, annual catches of 20-100 Hector’s dolphins occurred in Canterbury waters in bottom-set commercial and recreational gillnets. …	7	1	59-64
Report	2000	Baird, S. J.; Bradford, E.	Estimation of Hector's dolphin bycatch from inshore fisheries, 1997/98 fishing year				https://dxcprod.doc.govt.nz/globalassets/documents/science-and-technical/csl3024.pdf	Information on the bycatch of Hectors dolphins (Cephalorhynchus hectori) in inshore setnet and trawl fisheries off the east coast of South Island, New Zealand, was collected by observers during the 1997/98 fishing year. Shark species and elephant fish were the main target species for the 214 observed setnets; five observed setnets accounted for the eight Hectors dolphins reported caught (two we…			19				Department of Conservation	Wellington, N.Z.
Journal article	2013	Slooten, E	Effectiveness of area-based management in reducing bycatch of the New Zealand dolphin	Endangered Species Research		10.3354/esr00483	http://www.int-res.com/abstracts/esr/v20/n2/p121-130/	The New Zealand (NZ) dolphin Cephalorhynchus hectori, also known as Hector’s dolphin, is endemic and listed as Endangered by the NZ Department of Conservation and the International Union for the Conservation of Nature. The North Island population, also known as Maui’s dolphin, is listed separately as Critically Endangered. The Threat Management Plan for NZ dolphins identifies bycatch in gillnet a…	20	2	121-130
Report	2009	Thompson, Finlay N; Abraham, E. R.	Dolphin Bycatch in New Zealand Trawl Fisheries, 1995-96 to 2006-07				https://docs.niwa.co.nz/library/public/NZAEBR36.pdf	In the 12 years from 1 October 1995 to 30 September 2007, a total of 107 dolphin captures were reported by Ministry of Fisheries observers in trawl and longline fisheries within New Zealand’s Exclusive Economic Zone. These captures included 80 common dolphins, 9 pilot whales, and 7 dusky dolphins that were reported killed in trawl fisheries. In longline fisheries over the same period, eight dolph…			24				Ministry of Fisheries	Wellington, N.Z.
Hector's dolphin - Management
Journal article	2008	Conroy, Michael J.; Barker, Richard J.; Dillingham, Peter W.; Fletcher, David; Gormley, Andrew M.; Westbrooke, Ian M.	Application of decision theory to conservation management: recovery of Hector's dolphin	Wildlife Research		10.1071/WR07147	http://www.publish.csiro.au/?paper=WR07147	Decision theory provides an organised approach to decision making in natural resource conservation. The theory requires clearly stated objectives, decision alternatives and decision-outcome utilities, and thus allows for the separation of values (conservation and other societal objectives) from beliefs. Models express belief in the likely response of the system to conservation actions, and can ra…	35	2	93-102
Journal article	1999	Martien, Karen K; Taylor, Barbara L; Slooten, Elizabeth; Dawson, Steve	A sensitivity analysis to guide research and management for Hector's dolphin	Biological Conservation		10.1016/S0006-3207(99)00020-8	https://linkinghub.elsevier.com/retrieve/pii/S0006320799000208	Hector's dolphin (Cephalorhynchus hectori) is an uncommon endemic of New Zealand which is suspected to be in decline due to entanglement mortality. However, uncertainty in available data has led to a dispute between the New Zealand Ministry of Fisheries and the New Zealand Department of Conservation over the status of this species. We use a density-dependent deterministic model to predict the fut…	90	3	183-191
Journal article	2019	Brough, Tom; Rayment, William; Slooten, Elisabeth; Dawson, Stephen	Fine scale distribution for a population of New Zealand's only endemic dolphin (Cephalorhynchus hectori) shows long-term stability of coastal hotspots	Marine Mammal Science		https://doi.org/10.1111/mms.12528	https://onlinelibrary.wiley.com/doi/abs/10.1111/mms.12528	Marine mammal populations often have “hotspots” of distribution. Understanding what drives these is important for understanding relationships with habitat and evaluating exposure to threats. Few studies investigate the stability of hotspots, yet this information is vital in assessing their importance. In this study, over 9,000 sightings made during systematic surveys over 29 yr are used to establ…	35	1	140-163
Journal article	2010	Baker, Cs; Chilvers, Bl; Constantine, R; DuFresne, S; Mattlin, Rh; van Helden, A; Hitchmough, R	Conservation status of New Zealand marine mammals (suborders Cetacea and Pinnipedia), 2009	New Zealand Journal of Marine and Freshwater Research		10.1080/00288330.2010.482970	http://www.tandfonline.com/doi/abs/10.1080/00288330.2010.482970	The conservation status of New Zealand (NZ) marine mammals (suborders Cetacea and Pinnipedia) is reappraised using the 2008 version of the NZ Threat Classification System. The list comprises 56 taxa (named species or subspecies, and as yet unnamed forms or types) in the following categories: Threatened eight taxa (five Nationally Critical and three Nationally Endangered); Vagrant six taxa; Migran…	44	2	101-115
Report	2003	Martinez, E; Slooten, E	A selective, annotated bibliography for Hector's dolphin (Cephalorhynchus hectori)				https://www.doc.govt.nz/documents/science-and-technical/dsis124.pdf	This selective, annotated bibliography lists scientific publications relating to the biology, behaviour, conservation and management of Hector’s dolphin (Cephalorhynchus hectori) from 1872 onwards. It also includes articles not solely on this species, if they contain important findings relevant to the research and management of C. hectori. Unpublished articles or popular books and articles are ge…			39			DOC Science Internal Series	Department of Conservation	Wellington, N.Z.
Presentation	2003	Clement, Deanna; Whigham, Peter A	Location, Location, Location: Quantifying high density patterns of Hector’s dolphin in relation to oceanographic features				http://hdl.handle.net/10523/811	Hector’s dolphin (Cephalorhynchus hectori) is the only endemic dolphin species to New Zealand waters. From population estimates, it has been established that this species is one of the rarest of the world’s cetaceans and has been listed as a threatened species under the New Zealand Marine Mammals Protection Act. Largescale surveys have clearly demonstrated the patchy distribution patterns of thes…								Dunedin, New Zealand
Journal article	2006	Slooten, Elisabeth; Rayment, William; Dawson, Steve	Offshore distribution of Hector's dolphins at Banks Peninsula, New Zealand: Is the Banks Peninsula Marine Mammal sanctuary large enough?	New Zealand Journal of Marine and Freshwater Research		10.1080/00288330.2006.9517425	http://www.tandfonline.com/doi/abs/10.1080/00288330.2006.9517425	Aerial surveys of Hector's dolphins were carried out to evaluate the effectiveness of the Banks Peninsula Marine Mammal Sanctuary. In summer, the proportion of sightings inside the 4 nautical mile offshore boundary of the sanctuary was 79%. This dropped to just over 35% in winter. These estimates were used in a population viability analysis to determine whether the sanctuary needs to be extended …	40	2	333-343
Journal article	2011	Ross, Peter S.; Barlow, Jay; Jefferson, Thomas A.; Hickie, Brendan E.; Lee, Tatiana; MacFarquhar, Christina; Christien Parsons, E.; Riehl, Kimberly N.; Rose, Naomi A.; Slooten, Elisabeth; Tsai, Chia-Yang; Wang, John Y.; Wright, Andrew J.; Chu Yang, Shih	Ten guiding principles for the delineation of priority habitat for endangered small cetaceans	Marine Policy		10.1016/j.marpol.2010.11.004	https://linkinghub.elsevier.com/retrieve/pii/S0308597X10002022	The adoption of endangered species laws in various nations has intensiﬁed efforts to better understand, and protect, at-risk species or populations, and their habitats. In many countries, delineating a portion of a species’ habitat as particularly worthy of protection has become a mantra of these laws. Unfortunately, the laws themselves often provide scientists and managers with few, if any, guid…	35	4	483-488
Journal article	2014	Seabrook-Davidson, Mark N. H.; Brunton, Dianne H.	Public attitude towards conservation in New Zealand and awareness of threatened species.	Pacific Conservation Biology		10.1071/PC140286	http://www.publish.csiro.au/?paper=PC140286	A survey was conducted amongst a sample (n = 3 000) of the New Zealand public to gauge their perception of government spending on conservation. The survey also obtained an understanding of the level of awareness the public has of New Zealand threatened species. Respondents ranked eight areas of government spending, namely health, education, superannuation, law and order, defence, conservation of …	20	3	286
Thesis	2008	Rayment, William	Distribution and ranging of Hector's dolphins: implications for protected area design				https://ourarchive.otago.ac.nz/handle/10523/3460	The efficacy of a Marine Protected Area (MPA) is contingent on it having a design appropriate for the species it is intended to protect. Hector's dolphin (Cephalorhynchus hectori), a coastal delphinid endemic to New Zealand, is endangered due to bycatch in gillnets. Analyses of survival rate and population viability suggest that the Banks Peninsula population is most likely still declining despit…				410			University of Otago	Otago, New Zealand
Journal article	2012	Gormley, Andrew M.; Slooten, Elisabeth; Dawson, Steve; Barker, Richard J.; Rayment, Will; Fresne, Sam du; Bräger, Stefan	First evidence that marine protected areas can work for marine mammals	Journal of Applied Ecology		https://doi.org/10.1111/j.1365-2664.2012.02121.x	https://besjournals.onlinelibrary.wiley.com/doi/abs/10.1111/j.1365-2664.2012.02121.x	1. Marine protected areas (MPAs) have been advocated for the protection of threatened marine mammals, but there is no empirical evidence that they are effective. In 1988, the Banks Peninsula Marine Mammal Sanctuary was established to reduce gillnet mortalities of Hector’s dolphin Cephalorhynchus hectori, an endangered dolphin species endemic to New Zealand. This study assesses the effectiveness o…	49	2	474-480
Journal article	1998	Brager, Stefan; Schneider, Karsten	Near‐shore distribution and abundance of dolphins along the West Coast of the South Island, New Zealand	New Zealand Journal of Marine and Freshwater Research		10.1080/00288330.1998.9516809	http://www.tandfonline.com/doi/abs/10.1080/00288330.1998.9516809	Compared to other stretches of the New Zealand coast, very little is known about the cetacean fauna off the West Coast of the South Island. The purpose of this paper is to describe the near-shore distribution and abundance of dolphins in that area by summarising the results of two major studies. Between February 1995 and February 1997, 97 day trips were undertaken from Westport, Greymouth, and Ja…	32	1	105-112
Book	2019	Baker, C. Scott; Boren, Laura J; Childerhouse, Simon; Constantine, Rochelle; Van Helden, Anton; Lundquist, D; Rayment, William; Rolfe, Jeremy R; New Zealand; Department of Conservation	Conservation status of New Zealand marine mammals, 2019		978-1-988514-93-2		https://www.doc.govt.nz/globalassets/documents/science-and-technical/nztcs29entire.pdf
Book	2019	Fisheries New Zealand (Government agency); New Zealand; Department of Conservation	Protecting Hector's and Māui dolphins: consultation on proposals for an updated Threat Management Plan.		978-0-9951257-1-1		https://www.fisheries.govt.nz/dmsdocument/34971-2019-hectors-maui-dolphin-consultation
Journal article	2004	Dawson, S.; Slooten, E.; DuFresne, S.; Wade, P. R.; Clement, D.	Small-boat surveys for coastal dolphins: line-transect surveys for Hector's dolphins (Cephalorhynchus hectori).	Fishery Bulletin				Management of coastal species of small cetaceans is often impeded by a lack of robust estimates of their abundance. In the Austral summers of 1997-98, 1998-99, and 1999-2000 we conducted line-transect surveys of Hector's dolphin (Cephalorhynchus hectori) abundance off the north, east, and south coasts of the South Island of New Zealand. Survey methods were modified for the use of a 15-m sailing c…	102	3	441-451
Book	2004	Suisted, Rob; Neale, D. M; New Zealand; Department of Conservation	Department of Conservation marine mammal action plan for 2005-2010		978-0-478-22642-3			This Marine Mammal Action Plan (MMAP) provides a guide for conservation management of New Zealand’s marine mammals by the Department of Conservation over the next five years, and represents an active interpretation of priorities across a broad work area using key strategic documents and directive government policies. The Department’s work takes two general approaches: firstly to protect species, …							Dept. of Conservation	Wellington, N.Z.
Thesis	2019	Brough, T. E.	The ecology and conservation of hotspots for Hector’s dolphin				http://hdl.handle.net/10523/9156					280			University of Otago	Dunedin, New Zealand
Thesis	2019	Cross, C. L.	Spatial ecology of delphinids in Queen Charlotte Sound, New Zealand: Implications for conservation management.				http://hdl.handle.net/10179/14831	Understanding species’ ecological interactions and area usage depends on clear insight into their temporal and spatial patterns. Such information combined with recognition of regional human-invested interests, is crucial for developing conservation management efforts. Queen Charlotte Sound (QCS), South Island, New Zealand is a unique environment inhabited by diverse marine life, including several…				279			Massey University	Palmerston North, New Zealand
Book section	2019	Constantine, Rochelle	Hector’s and Māui Dolphins: Small Shore-Living Delphinids with Disparate Social Structures	Ethology and Behavioral Ecology of Odontocetes	978-3-030-16662-5 978-3-030-16663-2		http://link.springer.com/10.1007/978-3-030-16663-2_20	Hector’s dolphins (Cephalorhynchus hectori hectori) are a small (~1.5 m long) marine dolphin, primarily inhabiting turbid, coastal waters discontinuously around the South Island of New Zealand. The Māui dolphin (C. h. maui) is a critically endangered subspecies of Hector’s dolphin, only found along a small part of their original range spanning the west coast of the North Island of New Zealand. Bo…			435-447				Springer International Publishing	Cham
Journal article	2019	Wallis, Graham P.	Thirty years of conservation genetics in New Zealand: what have we learnt?	Journal of the Royal Society of New Zealand		10.1080/03036758.2019.1586735	https://www.tandfonline.com/doi/full/10.1080/03036758.2019.1586735	Few areas of conservation biology have grown at quite the same pace as conservation genetics. New Zealand exemplifies this growth with a 50–100-fold increase in publications since a review in 1994. A wide array of techniques in the fields of population genetics, molecular systematics and molecular biology has now become available to conservation biologists to apply to management. Here I review de…	49	3	320-346
Report	2014	Hoyt, E.; McGrath, G.; Bossley, M.; Knowles, T.	Assessing New Zealanders’ Willingness-to-pay to Protect the Endangered New Zealand Dolphin				https://whales.org/wp-content/uploads/2018/08/new-zealand-dolphin-report.pdf	The New Zealand (NZ) dolphin refers to a species of small dolphin, commonly known as Hector’s dolphin, found only in waters around New Zealand. The population has declined from around 30,000 in the 1970s to approximately 7,200 today. The North Island subspecies, Maui’s dolphin, has extremely low numbers, having declined from around 2,000 dolphins to fewer than 15 breeding females today (based on …			20				Whale and Dolphin Conservation	Chippenham, UK
Journal article	2007	Slooten, E.	Conservation management in the face of uncertainty: effectiveness of four options for managing Hector’s dolphin bycatch	Endangered Species Research		10.3354/esr003169		New Zealand’s endemic Hector’s dolphins Cephalorhynchus hectori overlap with gillnet and trawl fisheries throughout their geographic range. The catch rate in commercial gillnets has been estimated using independent observers. No quantitative estimates are available for bycatch in recreational gillnets or trawl fisheries. The catch rate (per dolphin, per km of gillnet, per year) in commercial gill…	3	2	169-179
Journal article	1995	Slooten, Elisabeth; M. Dawson, Stephen	Conservation of marine mammals in New Zealand	Pacific Conservation Biology		10.1071/PC950064	http://www.publish.csiro.au/?paper=PC950064	New Zealand has a diverse fauna of marine mammals, comprising 35 cetacean and six pinniped species. None of these is hunted within the 200 mile Exclusive Economic Zone, but several species are killed incidentally in coastal or deep-water fisheries. Particularly affected are Hector's Dolphin, Hooker's Sea Lion, and the New Zealand Fur Seal. Detailed information on the nature and magnitude of incid…	2	1	64
Journal article	2013	Dawson, S; Fletcher, D; Slooten, E	Habitat use and conservation of an Endangered dolphin	Endangered Species Research		10.3354/esr00508	http://www.int-res.com/abstracts/esr/v21/n1/p45-54/	We studied habitat use by Hector’s dolphins Cephalorhynchus hectori in order to quantify the influences of location, season, time and tide, and to determine how frequently dolphins use inner Akaroa Harbour where unattended gillnetting is allowed for 6 mo of the year (1 April to 30 September). T-POD acoustic dataloggers were moored in outer, mid- and inner Akaroa Harbour to quantify variation in h…	21	1	45-54
Thesis	2014	Hamner, R. M.	All in a DNA's work: conservation genetics and monitoring of the New Zealand endemic Maui's and Hector's dolphins				https://ir.library.oregonstate.edu/concern/graduate_thesis_or_dissertations/8910k0084	The critically endangered Maui's dolphin (Cephalorhynchus hectori maui) and the endangered Hector's dolphin (C. h. hectori) are endemic to the coastal waters of New Zealand, where their primary threat is fisheries-related mortality. The Maui's dolphin is among the most critically endangered cetaceans in the world, with its remnant population primarily concentrated in approximately 140 km along th…				294			Oregon State University	Corvallis, Oregon
Report	2012	Du Fresne, Samuel P; Burns, Daniel; Gates, Emma; New Zealand; Department of Conservation	An updated, annotated bibliography for Hector's (Cephalorhynchus hectori hectori) and Maui's (C. hectori maui) dolphins				http://www.doc.govt.nz/upload/documents/science-and-technical/drds332entire.pdf	In July 2003, a selective, annotated bibliography for Hector's dolphin (Cephalorhynchus hectori hectori) was published. Since then, this species has been redefined as two subspecies--Hector's dolphin (C. h. hectori) and Maui's dolphin (C. h. maui). This report presents an updated bibliography for the two subspecies, building on an informal (unpublished) update produced in 2008. In total, 39 peer-…			47			DOC Research and Development series 332	Department of Conservation	Wellington, N.Z.
Journal article	2020	Brough, T; Rayment, W; Slooten, E; Dawson, S	Spatiotemporal distribution of foraging in a marine predator: behavioural drivers of hotspot formation	Marine Ecology Progress Series		10.3354/meps13198	https://www.int-res.com/abstracts/meps/v635/p187-202/	Many species of marine predators display defined hotspots in their distribution, although the reasons why this happens are not well understood in some species. Understanding whether hotspots are used for certain behaviours provides insights into the importance of these areas for the predators’ ecology and population viability. In this study, we investigated the spatiotemporal distribution of fora…	635		187-202
Journal article	2002	Bräger, Stefan; Dawson, Stephen M.; Slooten, Elisabeth; Smith, Susan; Stone, Gregory S.; Yoshinaga, Austen	Site fidelity and along-shore range in Hector's dolphin, an endangered marine dolphin from New Zealand	Biological Conservation		10.1016/S0006-3207(02)00124-6	https://linkinghub.elsevier.com/retrieve/pii/S0006320702001246	Analyzes sightings of photographically identified Hector's dolphins seen at the Banks Peninsula in New Zealand to document site fidelity and the alongshore range of the dolphin species. Furthest two sightings of an individual dolphin; Evidence showing that gender did not significantly influence alongshore range; Evidence showing that site fidelity was high.	108	3	281-287
Journal article	2009	Rayment, William; Dawson, Steve; Slooten, Elisabeth	Seasonal changes in distribution of Hector's dolphin at Banks Peninsula, New Zealand: implications for protected area design	Aquatic Conservation: Marine and Freshwater Ecosystems		10.1002/aqc.1049	http://doi.wiley.com/10.1002/aqc.1049	The article presents a study on the seasonal variation of Hector's dolphin distribution relative to the effectiveness of the Banks Peninsula Marine Mammal Sanctuary (BPMMS) against bycatch gillnetting at Banks Peninsula, New Zealand. Aerial line-transect surveys were made to examine the dolphin distribution which continues to decline. It mentions that Partial Mantel tests show that the distance o…			n/a-n/a
Journal article	1991	Slooten, Elisabeth; Lad, Frank	Population biology and conservation of Hector's dolphin	Canadian Journal of Zoology		10.1139/z91-235	http://www.nrcresearchpress.com/doi/10.1139/z91-235	During the past decade, Hector's dolphins, Cephalorhynchus hectori, have suffered an alarming level of mortality due to entanglement in commercial and amateur gill nets. In this paper we study two Leslie matrix population models that incorporate known features of dolphin fertility and mortality, focussing on the information they provide regarding age distributions and maximum population growth ra…	69	6	1701-1707
Journal article	2009	Rayment, William; Dawson, Steve; Slooten, Elisabeth; Bräger, Stefan; Fresne, Sam Du; Webster, Trudi	Kernel density estimates of alongshore home range of Hector's dolphins at Banks Peninsula, New Zealand	Marine Mammal Science		10.1111/j.1748-7692.2008.00271.x	http://doi.wiley.com/10.1111/j.1748-7692.2008.00271.x	Knowledge about home ranges is essential for understanding the resources required by a species, identifying critical habitats, and revealing the overlap with anthropogenic impacts. Ranging behavior of Hector's dolphins ( Cephalorhynchus hectori) was studied via coastal photo-ID surveys in the Banks Peninsula Marine Mammal Sanctuary (BPMMS) between 1985 and 2006. Univariate kernel density estimate…	25	3	537-556
Thesis	2014	LaFountain, C.	Hector's Dolphins, Cephaloryhnchus hectori hectori: A Management Plan to Increase Populations via Increased Protective Legislature				https://capstone.paulsmiths.edu/system/files/videos/CLaFountain_ManagementFINAL.pdf	Hector's dolphins (Cephalorhynchus hectori) are the only cetacean endemic to New Zealand. The South Island subspecies (C. hectori hectori) has an estimated population size of 7,270 individuals and has been listed as Endangered on the IUCN red list since 2000. The largest threat to Hector's dolphins is gillnet mortalities – it's estimated that 63% of mortalities are caused by fisheries bycatch. Th…				31			Paul Smith's College	Paul Smiths, New York
Journal article	2016	Dittmann, S; Dawson, S; Rayment, W; Webster, T; Slooten, E	Hector's dolphin movement patterns in response to height and direction of ocean swell	New Zealand Journal of Marine and Freshwater Research		10.1080/00288330.2015.1119165	https://www.tandfonline.com/doi/full/10.1080/00288330.2015.1119165	A central question to any understanding of ecology is how animals use their habitat, and how habitat use is influenced by temporally changing features of the environment. Previous research on Hector’s dolphins at Akaroa Harbour, New Zealand suggested that dolphins leave inshore, harbour environments during or after rough weather. To test this hypothesis, visual sightings (2000–2012) and acoustic …	50	2	228-239
Journal article	2012	Wheen, N. R.	How the Law Lets Down the 'Down-Under Dolphin'--Fishing-Related Mortality of Marine Animals and the Law in New Zealand	Journal of Environmental Law		10.1093/jel/eqs017	https://academic.oup.com/jel/article-lookup/doi/10.1093/jel/eqs017	Regulatory control of fishing in response to fishing-related mortality of endemic marine animals in New Zealand waters has been weak and slow. The handful of populations and species that have been ‘protected’ from fishing activities are still probably declining or are unlikely to recover without further protection. The government itself recognises the inadequacies of its measures for protecting s…	24	3	477-497
Report	2020	Slooten, Elisabeth; Dawson, Stephen Michael	The scientific basis for currently proposed management options for Hector’s and Maui dolphins: a critique				http://biorxiv.org/lookup/doi/10.1101/2020.05.15.098889	New Zealand’s Ministry for Primary Industries (MPI) developed a risk analysis for Hector’s and Maui dolphins, in order to inform protection options being considered by the Ministers of Fisheries and Conservation. Unfortunately, MPI’s risk analysis combines several estimates that are biased, and the biases consistently act together to underestimate the level of bycatch and overestimate the species…							Ecology
Journal article	2000	Hughey, K.F.D.	An evaluation of a management saga: The Banks Peninsula Marine Mammal Sanctuary, New Zealand	Journal of Environmental Management		10.1006/jema.1999.0309	https://linkinghub.elsevier.com/retrieve/pii/S0301479799903092	The Banks Peninsula Marine Mammal Sanctuary, Canterbury, New Zealand, was established in 1988 to protect the Hector's dolphin Cephalorhynchus hectori from accidental entanglement in set nets (gill nets). Sanctuary establishment was strongly supported by environmental groups but has continued to be strongly opposed by both commercial and recreational fishers. This paper evaluates the issues surrou…	58	3	179-197
Journal article	2011	Runge, Michael C.	An Introduction to Adaptive Management for Threatened and Endangered Species	Journal of Fish and Wildlife Management		10.3996/082011-JFWM-045	https://meridian.allenpress.com/jfwm/article/2/2/220/203428/An-Introduction-to-Adaptive-Management-for	Abstract Management of threatened and endangered species would seem to be a perfect context for adaptive management. Many of the decisions are recurrent and plagued by uncertainty, exactly the conditions that warrant an adaptive approach. But although the potential of adaptive management in these settings has been extolled, there are limited applications in practice. The impediments to practical …	2	2	220-233
Journal article	2010	Slooten, Elisabeth; Dawson, Stephen M.	Assessing the effectiveness of conservation management decisions: likely effects of new protection measures for Hector's dolphin ( <i>Cephalorhynchus hectori</i> )	Aquatic Conservation: Marine and Freshwater Ecosystems		10.1002/aqc.1084	http://doi.wiley.com/10.1002/aqc.1084	The article presents a study which investigates the effectiveness of new protection measures for Hector's dolphin in New Zealand. The study assessed various protection measures including the ban of amateur, and commercial gillnetting, and trawling. Results indicate that the new protection measures are better than the former management and total protection approach. They also show that new protect…	20	3	334-347
Journal article	1999	Bräger, Stefan	Association patterns in three populations of Hector's dolphin, <i>Cephalorhynchus hectori</i>	Canadian Journal of Zoology		10.1139/z98-192	http://www.nrcresearchpress.com/doi/10.1139/z98-192	Most delphinids are very social and spend much time in the presence of conspecifics. The proportion of co-occurrences of any two individuals is usually measured by means of association indices. In this study, the "half-weight index" was used to describe the association patterns in three previously unstudied populations of Hector's dolphin, Cephalorhynchus hectori, around the South Island of New Z…	77	1	13-18
Journal article	1993	Dawson, S. M.; Slooten, E.	Conservation of Hector's dolphins: The case and process which led to establishment of the Banks Peninsula Marine Mammal Sanctuary	Aquatic Conservation: Marine and Freshwater Ecosystems		10.1002/aqc.3270030305	http://doi.wiley.com/10.1002/aqc.3270030305	1. Entanglement in gillnets constitutes the greatest known threat to populations of small cetaceans. In 1988, in response to data on the distribution and abundance, incidental catch, reproduction and population biology of Hector's dolphins, and after an extended period of public consultation, New Zealand's Department of Conservation created a 1170 km2 Marine Mammal Sanctuary. Within this area, gi…	3	3	207-221
Journal article	2011	Rayment, William; Clement, Deanna; Dawson, Steve; Slooten, Elisabeth; Secchi, Eduardo	Distribution of Hector's dolphin (Cephalorhynchus hectori) off the west coast, South Island, New Zealand, with implications for the management of bycatch	Marine Mammal Science		10.1111/j.1748-7692.2010.00407.x	http://doi.wiley.com/10.1111/j.1748-7692.2010.00407.x	To support decision making on placement of protected areas for Hector's dolphin on New Zealand's South Island west coast, we conducted three aerial surveys documenting the species’ distribution in this area. The first survey was designed to quantify alongshore distribution and abundance, and revealed a patchy distribution with a central zone of high density. Two further surveys, in summer and win…	27	2	398-420
Journal article	2015	Weir, Js; Sagnol, O	Distribution and abundance of Hector's dolphins ( <i>Cephalorhynchus hectori</i> ) off Kaikoura, New Zealand	New Zealand Journal of Marine and Freshwater Research		10.1080/00288330.2015.1020502	http://www.tandfonline.com/doi/full/10.1080/00288330.2015.1020502	Boat-based surveys of Hector's dolphins (Cephalorhynchus hectori) were conducted throughout 2013 to evaluate their distribution and abundance off Kaikoura. We conducted a total of 48 surveys and encountered 164 groups of Hector's dolphins. This study showed that Hector's dolphins off Kaikoura preferred areas of shallow, nearshore waters with poor water clarity and that there were more sightings t…	49	3	376-389
Thesis	1992	Smith, S. L.	Distribution, movements and abundance of Hector's dolphin around Banks Peninsula.				https://ir.canterbury.ac.nz/handle/10092/2801					101			University of Canterbury	Christchurch, New Zealand
Journal article	2013	Turek, J; Slooten, E; Dawson, S; Rayment, W; Turek, D	Distribution and abundance of Hector's dolphins off Otago, New Zealand	New Zealand Journal of Marine and Freshwater Research		10.1080/00288330.2013.771687	http://www.tandfonline.com/doi/abs/10.1080/00288330.2013.771687	Data on the distribution and abundance of Hector's dolphins (Cephalorhynchus hectori) along the Otago coastline, between Taieri Mouth and Ōamaru (approximately 130 km alongshore), were collected in 2010–2011. Alongshore surveys were conducted in small boats, travelling approximately 400 m from shore, at speeds of 10 to 15 knots. Photographic identification was used to establish sighting histories…	47	2	181-191
Hector's dolphin - Pollution
Journal article	1990	Buckland, SJ; Hannah, DJ; Taucher, JA; Slooten, E; Dawson, S	Polychlorinated dibenzo-p-dioxins and dibenzofurans in New Zealand's Hector's dolphin	Chemosphere		10.1016/0045-6535(90)90217-H			20	2021-07-09	1035-1042
Journal article	2018	Kumar, Reeti; Mukherji, Suparna	Threat posed by persistent organochlorine pesticides and their mobility in the environment	Current Organic Chemistry					22	10	954-972
Journal article	2020	Betty, Emma L; Bollard, Barbara; Murphy, Sinéad; Ogle, Mike; Hendriks, Hannah; Orams, Mark B; Stockin, Karen A	Using emerging hot spot analysis of stranding records to inform conservation management of a data-poor cetacean species	Biodiversity and Conservation					29	2	643-665
Journal article	2010	Stockin, K.A.; Law, R.J.; Roe, W.D.; Meynier, L.; Martinez, E.; Duignan, P.J.; Bridgen, P.; Jones, B.	PCBs and organochlorine pesticides in Hector’s (Cephalorhynchus hectori hectori) and Maui’s (Cephalorhynchus hectori maui) dolphins	Marine Pollution Bulletin		10.1016/j.marpolbul.2010.01.009	https://linkinghub.elsevier.com/retrieve/pii/S0025326X10000123	Polychlorinated biphenyls (PCBs) and organochlorine (OC) pesticide levels were determined in blubber samples collected from stranded and incidentally by-caught Hector’s (Cephalorhynchus hectori hectori) and Maui’s ( Cephalorhynchus hectori maui) dolphins from New Zealand waters between 1997 and 2009. PCBs (45 congeners) and a range of OC pesticides including dieldrin, hexachlorocyclohexane (HCH) …	60	6	834-842
Journal article	1996	Jones, P. D.; Leathem, S. V.; Hannah, D. J.; Day, P. J.; Dye, E. A.; Hofmann, K. A.; Lister, A. R.; Porter, L. J.; van Maanen, T.; Symons, R. K.	Biomagnification of PCBs and 2, 3, 7, 8-substituted polychlorinated dibenzo-p-dioxins and dibenzofurans in New Zealand’s Hector’s dolphins(Cephalorhynchus hectori)	Organohalogen compounds					29		108-113
Hector's dolphin - Status/Range
Journal article	2012	Slooten, E; Davies, N	Hector's dolphin risk assessments: old and new analyses show consistent results	Journal of the Royal Society of New Zealand		10.1080/03036758.2011.606820	http://www.tandfonline.com/doi/full/10.1080/03036758.2011.606820		42	1	49-60
Thesis	2016	Rodda, Judith Lynn	Analysis and geovisualisation of Hector’s dolphin abundance and distribution patterns in space and time				http://hdl.handle.net/10523/6320	While Hector’s dolphin (Cephalorhynchus hectorii) has been the topic of many research projects within the first Marine Mammal Sanctuary in New Zealand, few long-term analytical abundance and distribution projects in other population strongholds have been conducted. The primary purpose of this thesis project was to test quantitative observations that suggested that this unprotected population of H…				265			University of Otago	Otago, New Zealand
Thesis	2011	Turek, Jennifer Lynn	The distribution and abundance of Hector’s dolphins (Cephalorhynchus hectori) along the Otago coastline, New Zealand.					Hector’s dolphins (Cephalorhynchus hectori) are an endangered species endemic to New Zealand. Populations in some areas have been continuously studied for years, but this project is the first to extensively survey Otago’s Hector’s dolphins from Oamaru to Taieri Mouth, fully covering Statistical Fishing Area 24. Between September 2010 and November 2011, alongshore transects were followed in small …				100			Otago University	Dunedin, New Zealand
Journal article	2018	Naylor, Whitney; Parsons, E. C. M.	An Online Survey of Public Knowledge, Attitudes, and Perceptions Toward Whales and Dolphins, and Their Conservation	Frontiers in Marine Science		10.3389/fmars.2018.00153	https://www.frontiersin.org/articles/10.3389/fmars.2018.00153/full?utm_source=F-NTF&utm_medium=EMLX&utm_campaign=PRD_FEOPS_20170000_ARTICLE	In 2015, an online survey was conducted to investigate public attitudes and perceptions toward key cetacean (whale, dolphin, and porpoise) conservation and 'hot topic' issues such as legislative protection and whaling (n=858). The vast majority of the participants in this study indicated their permanent residence was the United States (n=577) or India (n=251). Perceptions of participants on the c…	5		153
Journal article	2011	Bird, Manu; Brunton, Dianne	Introduced species in New Zealand - Their impacts on a biodiversity hotspot.	Pacific Conservation Biology				A survey was conducted amongst a sample (n = 3 000) of the New Zealand public to gauge their perception of government spending on conservation. The survey also obtained an understanding of the level of awareness the public has of New Zealand threatened species. Respondents ranked eight areas of government spending, namely health, education, superannuation, law and order, defence, conservation of …	16		239-236
Journal article	2019	Hare, Kelly M.; Borrelle, Stephanie B.; Buckley, Hannah L.; Collier, Kevin J.; Constantine, Rochelle; Perrott, John K.; Watts, Corinne H.; Towns, David R.	Intractable: species in New Zealand that continue to decline despite conservation efforts	Journal of the Royal Society of New Zealand		10.1080/03036758.2019.1599967	https://www.tandfonline.com/doi/full/10.1080/03036758.2019.1599967	Global biodiversity loss is accelerating at an alarming rate. While considerable eﬀort and resources have gone into conservation management for many threatened species in New Zealand (NZ), some species are still ‘losing the battle’ despite much eﬀort, and others have been ignored altogether. Here, we present seven case studies to illustrate the breadth of complex, often ambiguous, threats faced b…	49	3	301-319
Book	2020	Roberts, J; Hendriks, Hannah	Characterisation of Hector's and Māui dolphin (Cephalorhynchus hectori) incident data focusing on temporal patterns.					We use the publicly available database of Hector's and Māui dolphin (Cephalorhynchus hectori hectori and Cephalorhynchus hectori maui, respectively) mortalities and incidents to investigate seasonal trends in major causes of death and look at demographic distribution of mortalities and seasonal carcass detection probability.
Journal article	2020	Stephenson, Fabrice; Goetz, Kimberly; Sharp, Ben R.; Mouton, Théophile L.; Beets, Fenna L.; Roberts, Jim; MacDiarmid, Alison B.; Constantine, Rochelle; Lundquist, Carolyn J.	Modelling the spatial distribution of cetaceans in New Zealand waters	Diversity and Distributions		10.1111/ddi.13035	https://onlinelibrary.wiley.com/doi/abs/10.1111/ddi.13035	Cetaceans are inherently difficult to study due to their elusive, pelagic and often highly migratory nature. New Zealand waters are home to 50% of the world's cetacean species, but their spatial distributions are poorly known. Here, we model distributions of 30 cetacean taxa using an extensive at-sea sightings dataset (n > 14,000) and high-resolution (1 km(2)) environmental data layers. Location …	26	4	495-516
Journal article	2014	Hamner, Rebecca M.; Constantine, Rochelle; Oremus, Marc; Stanley, Martin; Brown, Phillip; Scott Baker, C.	Long-range movement by Hector's dolphins provides potential genetic enhancement for critically endangered Maui's dolphin	Marine Mammal Science		10.1111/mms.12026	http://doi.wiley.com/10.1111/mms.12026	For endangered populations with low genetic diversity, low levels of immigration could lead to genetic rescue, reducing the risk of inbreeding depression and enhancing chances of long-term species survival. Our genetic monitoring of Maui's dolphins revealed the first contemporary dispersal of their sister subspecies, Hector's dolphin, from New Zealand's South Island into the Maui's dolphin distri…	30	1	139-153
Journal article	2008	Pichler, F. B.; Dawson, S. M.; Slooten, E.; Baker, C. S.	Geographic Isolation of Hector’s Dolphin Populations Described by Mitochondrial DNA Sequences	Conservation Biology		10.1111/j.1523-1739.1998.96390.x	http://doi.wiley.com/10.1111/j.1523-1739.1998.96390.x	To describe the genetic structure of Hector’s dolphin (Cephalorhynchus hectori) populations, we used the polymerase chain reaction to amplify and sequence a 360 base-pair fragment of the mitochondrial DNA control region from 34 beachcast or gillnet-caught specimens. Variation in these sequences identified 11 distinct haplotypes differing from one another by 0.28–1.67% and by an average of 4.47% f…	12	3	676-682
Journal article	2002	Baker, Alan N.; Smith, Adam N. H.; Pichler, Franz B.	Geographical variation in Hector's dolphin: Recognition of new subspecies of <i>Cephalorhynchus hectori</i>	Journal of the Royal Society of New Zealand		10.1080/03014223.2002.9517717	http://www.tandfonline.com/doi/abs/10.1080/03014223.2002.9517717	The endemic New Zealand dolphin Cephalorhynchus hectori has been shown through genetic analyses to consist of four regional populations separated to various degrees both geographically and reproductively. A morphological study of skull and mandible features was undertaken to examine variation between the most genetically distinct population, occurring on the west coast of the North Island, and th…	32	4	713-727
Journal article	2012	Hamner, Rebecca M.; Pichler, Franz B.; Heimeier, Dorothea; Constantine, Rochelle; Baker, C. Scott	Genetic differentiation and limited gene flow among fragmented populations of New Zealand endemic Hector’s and Maui’s dolphins	Conservation Genetics		10.1007/s10592-012-0347-9	http://link.springer.com/10.1007/s10592-012-0347-9	Gene flow among small fragmented populations is critical for maintaining genetic diversity, and therefore the evolutionary potential of a species. Concern for two New Zealand endemic subspecies, the Hector's (Cephalorhynchus hectori hectori) and Maui's (C. h. maui) dolphins, arises from their low abundance, slow rate of reproduction, and susceptibility to fisheries-related mortality. Our work exa…	13	4	987-1002
Journal article	1995	Stone, Gregory S.; Brown, Jenny; Yoshinaga, Austen	DIURNAL MOVEMENT PATTERNS OF HECTOR'S DOLPHIN AS OBSERVED FROM CLIFFTOPS	Marine Mammal Science		10.1111/j.1748-7692.1995.tb00295.x	http://doi.wiley.com/10.1111/j.1748-7692.1995.tb00295.x		11	3	395-402
Journal article	2002	Fletcher, David; Dawson, Stephen; Slooten, Elisabeth	Designing a mark-recapture study to allow for local emigration	Journal of Agricultural, Biological, and Environmental Statistics		10.1198/108571102799	http://link.springer.com/10.1198/108571102799	In using a population projection model to help manage the conservation of a long-lived species, we usually need a reliable estimate of adult survival. Mark-recapture studies are often used to estimate survival, and typically require the assumption that there is no permanent emigration from the study area. We consider how such a study might be extended to allow for local emigration, that is, movem…	7	4	586-593
Journal article	1993	Slooten, Elisabeth; Dawson, Stephen M.; Whitehead, Hal	Associations among photographically identified Hector's dolphins	Canadian Journal of Zoology		10.1139/z93-324	http://www.nrcresearchpress.com/doi/10.1139/z93-324	Associations among Hector's dolphins photographically identified in the waters off Banks Peninsula, New Zealand, were studied using cluster analyses of simple and half-weight association indices. In addition, we carried out a temporal analysis of association patterns, plotting changes in the standardized reassociation rate over time. Some individually identified Hector's dolphins were photographe…	71	11	2311-2318
Journal article	2004	Slooten, Elisabeth; Dawson, Stephen Michael; Rayment, William Jacob	Aerial surveys for coastal dolphins: Abundance of Hector's dolphins off the South Island west coast, New Zealand	Marine Mammal Science		10.1111/j.1748-7692.2004.tb01173.x	http://doi.wiley.com/10.1111/j.1748-7692.2004.tb01173.x	Line-transect surveys of abundance depend critically on the estimation of detection probability, which includes corrections for availability and visibility. In this aerial line-transect survey for Hector's dolphin (Cephalorhynchus hectori) we recorded dive times from a helicopter to estimate the proportion of time that dolphins could be seen at or near the water surface and were therefore 'availa…	20	3	477-490
Conference paper	2013	Rodda, J.; Moore, A.	Hotspots of Hector’s dolphins on the south coast
Journal article	2001	Dawson, Stephen; Pichler, Franz; Slooten, Elisabeth; Russell, Kirsty; Baker, C. Scott	THE NORTH ISLAND HECTOR'S DOLPHIN IS VULNERABLE TO EXTINCTION	Marine Mammal Science		10.1111/j.1748-7692.2001.tb01278.x	http://doi.wiley.com/10.1111/j.1748-7692.2001.tb01278.x	Studies Hector's dolphins, the rarest marine dolphin found in the waters of New Zealand. Population and coastal distribution of the species; Reclassification of the species as endangered; Results of the mitochondrial (mt) DNA control region analysis shows distinct specie population; Low levels of gene diversity seen as an important contributing factor in the threat of extinction; Contribution of …	17	2	366-371
Report	2008	IUCN	Cephalorhynchus hectori: Reeves, R.R., Dawson, S.M., Jefferson, T.A., Karczmarski, L., Laidre, K., O’Corry-Crowe, G., Rojas-Bracho, L., Secchi, E.R., Slooten, E., Smith, B.D., Wang, J.Y. & Zhou, K.: The IUCN Red List of Threatened Species 2013: e.T4162A44199757				http://www.iucnredlist.org/details/4162/0								International Union for Conservation of Nature
Report	2014	Maas, B.	Facing Extinction: Maui’s and Hector’s Dolphins				https://www.academia.edu/10451203/Facing_Extinction_Maui_s_and_Hector_s_Dolphins				8				NABU International Foundation for Nature	Berlin, Germany
Hector's dolphin - Noise/Communication
Journal article	2000	Stone, Gregory S; Yoshinaga, Austen	Hector's dolphin Cephalorhynchus hectori calf mortalities may indicate new risks from boat traffic and habituation	Pacific Conservation Biology		10.1071/PC000162		Two Hector's Dolphin calves Cephalorhynchus hectori were killed by probable boat collision in 1999, indicating that boat strikes may pose more of a threat to the species than previously thought. When discovered, one dead calf was still tended by its mother. After recovery, both animals were necropsied with trauma from boat strikes as the most likely cause of death. These deaths are discussed in t…	6	2	162-170
Journal article	2005	Orams, MARK	Dolphins, whales and ecotourism in New Zealand: What are the impacts and how should the industry be managed	Nature-based tourism in peripheral areas: Development or disaster							231-45
Journal article	2010	Childerhouse, Simon	Cetacean research in New Zealand 2006/07	DOC Research & Development Series					323
Journal article	2016	Shone, Michael C; Espiner, Stephen; Stewart, Emma J	Examining the designation effect of marine protected areas: The case of Akaroa, New Zealand	Tourism in Marine Environments		10.3727/154427316X693199		The designation effect of terrestrial protected areas (e.g., national parks) has an extensive literature; however, much less has been written about the nature of this effect in marine environments. This study therefore explores the relationship between marine conservation designation and tourist visitation in Akaroa, New Zealand. Quantitative and qualitative data were collected via a visitor surv…	12	1	2021-01-15
Book	2004	Childerhouse, Simon	Cetacean Research in New Zealand, 2002/03		0-478-22543-1										Department of Conservation
Conference paper	2013	Alley, M	Wildlife in New Zealand as a source of zoonoses								153-160
Journal article	1999	Bejder, Lars; Dawson, Stephen M.; Harraway, John A.	RESPONSES BY HECTOR'S DOLPHINS TO BOATS AND SWIMMERS IN PORPOISE BAY, NEW ZEALAND	Marine Mammal Science		10.1111/j.1748-7692.1999.tb00840.x	http://doi.wiley.com/10.1111/j.1748-7692.1999.tb00840.x	Theodolite tracking (61 d; 251 h) was used to quantify dolphin reactions to boats and swimmers in the austral summers of 1995-1996 and 19961997. Dolphins were accompanied by swimmers (within 200 m) for 11.2% of the total observation time, whereas boats accounted for an additional 12.4%. Dolphins were not displaced by either of these activities. Swimmers caused only weak, non-significant effects, …	15	3	738-750
Journal article	2019	Leunissen, Eva M.; Rayment, William J.; Dawson, Stephen M.	Impact of pile-driving on Hector's dolphin in Lyttelton Harbour, New Zealand	Marine Pollution Bulletin		10.1016/j.marpolbul.2019.03.017	https://linkinghub.elsevier.com/retrieve/pii/S0025326X19302012	Several dolphin species occur close inshore and in harbours, where underwater noise generated by pile-driving used in wharf construction may constitute an important impact. Such impacts are likely to be greatest on species such as the endangered Hector's dolphin (Cephalorhynchus hectori), which has small home ranges and uses this habitat type routinely. Using automated echolocation detectors in L…	142		31-42
Journal article	2008	Travis, Georgia-Rose	Boat preference and stress behaviour of Hector's Dolphin in response to tour boat interactions					Dolphins are increasingly coming into contact with humans, particularly where tourism is involved. It has been assumed that such contact causes chronic stress on dolphin populations. This study examined relatively naive populations of Hector's dolphins and their interaction with various watercrafts. Dolphins in New Zealand have been observed using theodolites and boat-based observations over the …			335
Journal article	2017	Forney, Ka; Southall, Bl; Slooten, E; Dawson, S; Read, Aj; Baird, Rw; Brownell, Rl	Nowhere to go: noise impact assessments for marine mammal populations with high site fidelity	Endangered Species Research		10.3354/esr00820	http://www.int-res.com/abstracts/esr/v32/p391-413/	As awareness of the effects of anthropogenic noise on marine mammals has grown, research has broadened from evaluating physiological responses, including injury and mortality, to considering effects on behavior and acoustic communication. Most mitigation efforts attempt to minimize injury by enabling animals to move away as noise levels are increased gradually. Recent experiences demonstrate that…	32		391-413
Journal article	2016	Pine, Matthew K.; Jeffs, Andrew G.; Wang, Ding; Radford, Craig A.	The potential for vessel noise to mask biologically important sounds within ecologically significant embayments	Ocean & Coastal Management		10.1016/j.ocecoaman.2016.04.007	https://linkinghub.elsevier.com/retrieve/pii/S0964569116300564		127		63-73
Journal article	2018	Leunissen, Eva M.; Dawson, Stephen M.	Underwater noise levels of pile-driving in a New Zealand harbour, and the potential impacts on endangered Hector's dolphins	Marine Pollution Bulletin		10.1016/j.marpolbul.2018.07.024	https://linkinghub.elsevier.com/retrieve/pii/S0025326X18305022	Impact pile-driving generates loud underwater anthropogenic sounds, and is routinely conducted in harbours around the world. Surprisingly few studies of these sounds and their propagation are published in the primary literature. To partially redress this we studied pile-driving sounds in Lyttelton Harbour, New Zealand, during wharf reconstruction after earthquake damage. That Lyttelton harbour is…	135		195-204
Journal article	2010	Dawson, Stephen M.; Thorpe, C. William	A Quantitative Analysis of the Sounds of Hector's Dolphin	Ethology		10.1111/j.1439-0310.1990.tb00424.x	http://doi.wiley.com/10.1111/j.1439-0310.1990.tb00424.x	We developed an automatic, computer‐based system in which digital signal processing techniques were used to measure 31 variables from digitized Hector's dolphin (Cephalorhynchus hectori) sounds. Principal component analyses of these data were used to investigate the relationships between sounds. Hector's dolphins make only a very few types of pulsed “clicks”, most of which are centred around 125 …	86	2	131-145
Thesis	2018	Leunissen, E.	Underwater noise from pile-driving and its impact on Hector's dolphins in Lyttelton Harbour, New Zealand				http://hdl.handle.net/10523/7860	Noise levels were measured in Lyttelton Harbour in order to study pile-driving noise produced during wharf reconstruction. Sound recordings were made throughout the harbour, using several moored and mobile recording systems. In addition, an autonomous system recorded sound over a one-month period. Ambient noise in Lyttelton was heavily influenced by anthropogenic sources such as large and small v…				170			University of Otago	Dunedin, New Zealand
Thesis	1990	Dawson, S. M.	Sounds, acoustic behaviour and gillnet entanglement of Hector's dolphin.				http://hdl.handle.net/10092/5817	Vocalisations of free-ranging Hector's dolphins were recorded with wide-band recording equipment. Preliminary analyses of these sounds showed them to be high-frequency clicks centred around 120-125kHz. Digital signal processing methods were used to automatically measure many features of the sounds and, in combination with multivariate statistical methods, to provide a quantitative analysis of the…				140			University of Canterbury	Christchurch, New Zealand
Report	2000	Stone, G.; Cavagnaro, L.; Hutt, A.; Kraus, S.; Baldwin, K.; Brown, J.	Reactions of Hector’s dolphins to acoustic gillnet pingers				https://www.doc.govt.nz/globalassets/documents/science-and-technical/csl3071.pdf				28				Department of Conservation	Wellington, N.Z.
Journal article	2010	Dawson, Stephen M.	Clicks and Communication: The Behavioural and Social Contexts of Hector's Dolphin Vocalizations	Ethology		10.1111/j.1439-0310.1991.tb00281.x	http://doi.wiley.com/10.1111/j.1439-0310.1991.tb00281.x	Hector's dolphins (Cephalorhynchus hectori) have a simple vocal repertoire, consisting almost entirely of ultrasonic clicks. They produce no whistles, and very few audible sounds. To examine acoustic communication in this species I analysed the relationship between click types and behaviour. The proportion of complex click types was greater in large groups, suggesting that these sounds have socia…	88	4	265-276
Hector's dolphin - Population Status/Trajectory
Book	2016	Hamner, Rebecca; Steel, Debbie; Constantine, Rochelle; Morrissey, Mike; Ogle, Mike; Weir, Jody; Olavarria, Carlos; Baxter, Andrew; Arlidge, William; Boren, Laura; Baker, C.	Local population structure and abundance of Hector's dolphins off Kaikoura – 2014 and 2015					Hector's dolphins (Cephalorhynchus hectori hectori) are distributed discontinuously around the South Island of New Zealand, with genetically differentiated regional populations along the east, west and south coasts. Fine-scale assessments of local population structure are needed to better understand the role of corridors and local dispersal on the maintenance or loss of connectivity in Hector's d…
Report	2001	Slooten, E	Quantifying abundance of Hector's dolphins between Farewell Spit and Milford Sound				https://www.researchgate.net/publication/253606234_Quantifying_abundance_of_Hector's_dolphins_between_Farewell_Spit_and_Milford_Sound	This report summarises results of an aerial line-transect survey to quantify Hector’s dolphin abundance in the coastal area off the South Island West Coast between Farewell Spit and Milford Sound in December 2000 and early January 2001. The primary set of transect lines was placed at 45° to the coast, extending out to 4 nautical miles (n.m.) offshore. Lines were spaced apart at 2 or 4 n.m. interv…			17			DOC Science Internal Series	Department of Conservation	Wellington, N.Z.
Journal article	2001	Bejder, Lars; Dawson, Steve	Abundance, residency, and habitat utilisation of Hector's dolphins ( <i>Cephalorhynchus hectori</i> ) in Porpoise Bay, New Zealand	New Zealand Journal of Marine and Freshwater Research		10.1080/00288330.2001.9516998	http://www.tandfonline.com/doi/abs/10.1080/00288330.2001.9516998	Theodolite tracking and boat-based photo-identification surveys were carried out in the austral summers of 1995/96 and 1996/97 to assess abundance, residency, and habitat utilisation of Hector's dolphins (Cephalorhynchus hectori van Beneden 1881) in Porpoise Bay, on the south-east corner of the South Island of New Zealand. Data are consistent with the model of a small resident population that is …	35	2	277-287
Thesis	1990	Slooten, Elisabeth	Population biology, social organization and behaviour of Hector's Dolphins				https://ir.canterbury.ac.nz/bitstream/handle/10092/5800/slooten_thesis.pdf;sequence=1	Hector's dolphins are threatened with local extinction by entanglement in coastal gillnets. This thesis provides data on population biology, social organization and behaviour of Hector's dolphins that help assess human impacts on their populations. To estimate population growth, I integrated anatomical studies which estimated longevity and age at first reproduction, with photographic field studie…				127			University of Canterbury	Christchurch, New Zealand
Book	2014	MacKenzie, Darryl I; Clement, Deanna Marie; New Zealand; Ministry for Primary Industries	Abundance and distribution of ECSI Hector's dolphin		978-0-478-42372-3		http://fs.fish.govt.nz/Page.aspx?pk=113&dk=23511http://fs.fish.govt.nz/Page.aspx?pk=113&dk=23512
Book	2019	MacKenzie, Darryl I; Clement, Deanna Marie; Fisheries New Zealand (Government agency)	Abundance and distribution of Hector's dolphin on south coast South Island		978-1-990017-00-1		https://fs.fish.govt.nz/Doc/24773/AEBR-2019-236-Hectors-dolphin-survey.pdf.ashx								Fisheries New Zealand, Tini a Tangaroa
Book	2016	MacKenzie, Darryl I; Clement, Deanna Marie; New Zealand; Ministry for Primary Industries	Abundance and distribution of WCSI Hector's dolphin		978-1-77665-236-5		http://www.mpi.govt.nz/news-and-resources/publications
Report	2002	Pichler, Franz B	Genetic assessment of population boundaries and gene exchange in Hector's dolphin				http://bibpurl.oclc.org/web/5332 http://www.doc.govt.nz/Publications/004%7EScience-and-Research/DOC-Science-Internal-Series/PDF/DSIS44.pdf							DOC SCIENCE INTERNAL SERIES 44	Dept. of Conservation	Wellington, N.Z.
Magazine article	2005	Herbert, K.	The World's Smallest Dolphin.	Wildlife Conservation				The article focuses on Maui's dolphin Hector's dolphin species, the world's rarest dolphins. Maui's dolphin dwells in waters off the west coast of New Zealand's North Island. A close cousin of the South Island Hector's dolphin, the Maui's numbers is just less than 100. It has unfortunately got the distinction of endangered species by the World Conservation Union. The endangered Hector's is a litt…	108	4	16-16
Journal article	2017	Pala, Christopher	New Zealand's endemic dolphins are hanging by a thread	Science		10.1126/science.355.6325.559	https://www.sciencemag.org/lookup/doi/10.1126/science.355.6325.559	Like Mexico's embattled vaquita porpoise, the Maui's dolphin may be making its last stand. The world's smallest and rarest dolphin, the Maui's lives off the west coast of New Zealand's North Island and is down to about 60 individuals, from 2000 in the 1970s. Scientists and nongovernmental organizations blame its death spiral on gillnets and bottom trawlers: legal fishing methods that snare it by …	355	6325	559-559
Journal article	2009	Webster, Trudi A.; Dawson, Stephen M.; Slooten, Elisabeth	Evidence of Sex Segregation in Hector's Dolphin (<I>Cephalorhynchus hectori</I>)	Aquatic Mammals		10.1578/AM.35.2.2009.212	http://www.aquaticmammalsjournal.org/index.php?option=com_content&view=article&id=128:evidence-of-sex-segregation-in-hectors-dolphin-cephalorhynchus-hectori&catid=33:volume-35-issue-2&Itemid=95	Segregation by sex is evident at a variety of levels in many birds, fishes, and mammals. Segregation has been observed in marine mammals to varying degrees, but it was previously undocumented in Hector's dolphin (Cephalorhynchus hecrori). Forty-three groups (of group size ≤ 5) were sexed using an underwater pole-camera; 91% of groups consisting of two to five individuals (n = 32) were either all …	35	2	212-219
Journal article	2005	Gormley, Andrew M.; Dawson, Stephen M.; Dawson, Stephen M.; Slooten, Elisabeth; Brager, Stefan	Capture-recapture estimates of Hector's dolphin abundance at Banks Peninsula, New Zealand	Marine Mammal Science		10.1111/j.1748-7692.2005.tb01224.x	http://doi.wiley.com/10.1111/j.1748-7692.2005.tb01224.x	Capture-recapture techniques have been extensively used to estimate survival rates of Hector's dolphins at Banks Peninsula, but not abundance. We analyzed nine seasons of photo-identification data using a model-fitting approach in the computer program MARK, and then used MARK's estimates of capture probabilities to calculate the abundance of distinctive individuals. We extrapolated these estimate…	21	2	204-216
Journal article	1991	Slooten, Elisabeth	Age, growth, and reproduction in Hector's dolphins	Canadian Journal of Zoology		10.1139/z91-234	http://www.nrcresearchpress.com/doi/10.1139/z91-234	Data are provided on the reproductive biology and life history of Hector's dolphin, Cephalorhynchus hectori, a species found only in New Zealand waters. Samples were taken from 60 dolphins found beach-cast or killed incidentally in fishing gear. Male and female reproductive tracts were examined macroscopically and histologically, and tooth sections provided an age estimate for each individual. Th…	69	6	1689-1700
Journal article	2010	Webster, Trudi; Dawson, Steve; Slooten, Elisabeth	A simple laser photogrammetry technique for measuring Hector's dolphins ( <i>Cephalorhynchus hectori</i> ) in the field	Marine Mammal Science		10.1111/j.1748-7692.2009.00326.x	http://doi.wiley.com/10.1111/j.1748-7692.2009.00326.x	The ability to measure and age individuals within a population has many important applications, for example, for examining growth and determining size class. We developed a simple photogrammetric system using two parallel lasers and a digital camera, in order to measure dorsal fin dimensions of free-ranging Hector's dolphins. Laser dots were projected onto the fin, providing scale, thus allowing …	26	2	296-308
Thesis	2020	McGrath, G.	The History of New Zealand/Aotearoa Dolphins Cephalorhynchus hectori: Abundance and Distribution				http://hdl.handle.net/10523/10467	Hector’s and Māui dolphins (Cephalorhynchus hectori) are endemic dolphins of Aotearoa New Zealand. This thesis documents how C. hectori have changed from being the most common dolphin species seen in New Zealand waters to one of the rarest. The decline of C. hectori has been almost entirely due to bycatch in inshore net fisheries. This collection and analysis of historical information documents a…				302			University of Otago	Dunedin, New Zealand
Thesis	1998	Bräger, S. H.-J.	Behavioural ecology and population structure of Hector's dolphin (Cephalorhynchus hectori)				https://ourarchive.otago.ac.nz/handle/10523/3507	Aspects of social structure, behavioural ecology, and population biology of Hector's dolphin (Cephalorhynchus hectori) were studied. Especially information on ranging behaviour and group composition of this species were scarce albeit important for its conservation. Fieldwork was carried out in seven study areas along the east and west coasts of the South Island of New Zealand between November 199…				168			University of Otago	Dunedin, New Zealand
document	2013	Hamner, R. M.; Constantine, R.; Mattlin, R.; Waples, R. S.; Baker, C. S.	Genotype capture-recapture estimates of abundance and effective population size of Hector’s dolphins in Cloudy Bay, New Zealand												Submitted to the Scientific Committee of the International Whaling Commission, Jeju, South Korea
Journal article	1992	Slooten, Elisabeth; Dawson, Stephen M.; Lad, Frank	SURVIVAL RATES OF PHOTOGRAPHICALLY IDENTIFIED HECTOR'S DOLPHINS FROM 1984 TO 1988	Marine Mammal Science		10.1111/j.1748-7692.1992.tb00049.x	http://doi.wiley.com/10.1111/j.1748-7692.1992.tb00049.x	Re-sightings of photographically identified individuals were used to estimate survival rates for a free-living population of Hector's dolphins Cephalorhynchus hectori, a species endemic to New Zealand waters. Most individuals were identified from injuries to the dorsal fin. Consequently, the photographic catalog contained very few young individuals. Our analysis included no newborn calves or year…	8	4	327-343
Report	2001	Duffy, C.; Williams, B.	Preliminary aerial survey for Hector's dolphin (Cephalorhynchus hectori), north-west North Island				https://dcon01mstr0c21wprod.azurewebsites.net/globalassets/documents/science-and-technical/casn332.pdf	In April 1999 New Plymouth Area conducted an aerial survey for Hector's dolphin (Cephalorhynchus hectori) between Urenui and Tirua Point. All coastal waters within 2 km (1.1 nautical miles) of shore were searched using an overhead fixed-wing aircraft flown at an altitude of 120 m. Counts were made of common dolphin, bottlenosed dolphin and 14 other species of marine mammal, sea bird and pelagic f…			14			Conservation Advisory Science Notes No. 332	Department of Conservation	Wellington, N.Z.
Journal article	2003	Burkhart, Stephanie M.; Slooten, Elisabeth	Population viability analysis for Hector's dolphin ( <i>Cephalorhynchus hectori)</i> : A stochastic population model for local populations	New Zealand Journal of Marine and Freshwater Research		10.1080/00288330.2003.9517189	http://www.tandfonline.com/doi/abs/10.1080/00288330.2003.9517189	Mortality of Hector's dolphin (Cephalorhynchus hectori) in gill-net fisheries is a threat to local populations throughout its range. This population viability analysis extends previous work by exploring a wider range of fishing levels and population growth rates, by incorporating year-toyear and environmental variability and by reporting results for smaller population units. Ten of the 16 populat…	37	3	553-566
Report	2020	Slooten, Elisabeth; Dawson, Stephen Michael	Updated population viability analysis, population trends and PBRs for Hector’s and Maui dolphin				http://biorxiv.org/lookup/doi/10.1101/2020.03.25.008839	EXECUTIVE SUMMARY Updated population viability analyses, incorporating the latest abundance and bycatch data indicate that: The estimated population decline for Maui dolphin is 2% per year There is a 68% probability that the population is continuing to decline After 30 years (6 more surveys) statistical power of detecting this rate of decline would be < 15% Only very large declines (37%) and reco…							Ecology
Journal article	1999	Cameron, Claire; Barker, Richard; Fletcher, David; Slooten, Elisabeth; Dawson, Stephen	Modelling Survival of Hector's Dolphins around Banks Peninsula, New Zealand	Journal of Agricultural, Biological, and Environmental Statistics		10.2307/1400593	http://www.jstor.org/stable/1400593?origin=crossref	In 1988, a marine mammal sanctuary was established around Banks Peninsula to reduce Hector's dolphin entanglement in commercial and recreational gill nets. We describe the application of a multistate mark-recapture model to data from photographic identification surveys to determine the effect of the sanctuary on dolphin survival rates. The model allows sightings to occur in three geographic strat…	4	2	126
Hector's dolphin - Reduced prey
Journal article	1991	Thorpe, C William; Bates, Richard HT; Dawson, Stephen M	Intrinsic echolocation capability of Hector’s dolphin, C ephalorhynchushectori	The Journal of the Acoustical Society of America				A sonar system's echolocation capabilities can be inferred from the ambiguity distribution (defined here in terms of the conventional signal response function) of each of its transmitted signals. Several records of sounds emitted by Hector's dolphin are analyzed. The computed ambiguity distributions indicate that the sonar clicks of Hector's dolphins should be capable of resolving the ranges of t…	90	6	2931-2934
Book	2004	Duignan, PÁdraig J; Gibbs, Nadine J; Jones, Gareth W	Autopsy of Cetaceans Incidentally Caught in Commercial Fisheries, and All Beachcast Specimens of Hector's Dolphins, 2001/02		0-478-22569-5										Department of Conservation Wellington,, New Zealand
Journal article	2019	Nelson, Whitney; Radford, Craig	Acoustic monitoring of Cephalorhynchus hectori off the West Coast North Island, New Zealand	Report prepared for the Department of Conservation
Thesis	2018	Wickman, Lindsay Marie	Estimating mark rate and its effect on the precision of estimates of survival rate for a long-term study of Hector’s dolphins (Cephalorhynchus hectori) at Banks Peninsula, NZ				http://hdl.handle.net/10523/7990	An accurate and precise estimate of mark rate (the proportion of individuals with marks suitable for photo-ID) is essential for adjusting estimates of abundance from capture-recapture models to include the unmarked portion of the population. Capture-recapture analyses on marine mammals typically assume that mark rate is constant over time, but this may not be true if management has decreased the …				137			University of Otago	Dunedin, New Zealand
Journal article	1997	Stone, G.; Kraus, S.; Hutt, A.; Martin, S.; Yoshinaga, A.; Joy, L.	Reducing by-catch: Can acoustic pingers keep Hector's dolphins out of fishing nets?	Marine Technology Society Journal				Underwater acoustic pingers, emitting a 10 kHz sound (with harmonics up to 110 kHz), were tested in New Zealand to evaluate their potential effectiveness in preventing entanglement and death of Hector's dolphins (Cephalorhynchus hectori) in gillnets. A 1996 study site was established in Akaroa Harbour, an area known for high concentrations of Hector's dolphins. A remote controlled device was inst…	31	2	2021-03-07
Journal article	1991	Dawson, Stephen M.	Incidental catch of Hector's dolphin in inshore gillnets	Marine Mammal Science		10.1111/j.1748-7692.1991.tb00103.x	http://doi.wiley.com/10.1111/j.1748-7692.1991.tb00103.x	The incidental catch of Hector's dolphins (Cephalorhynchus hectori) in gillnets in Pegasus Bay and Canterbury Bight, New Zealand is assessed. From 1984 to 1988, at least 230 Hector's dolphins were killed in groundfish gillnets by commercial and amateur fishermen. Approximately 91% of entanglements occurred from November to February. Seasonality of catch corresponded to increased commercial gillne…	7	3	283-295
Journal article	2009	Kyhn, Line A.; Tougaard, J.; Jensen, F.; Wahlberg, M.; Stone, G.; Yoshinaga, A.; Beedholm, K.; Madsen, P. T.	Feeding at a high pitch: Source parameters of narrow band, high-frequency clicks from echolocating off-shore hourglass dolphins and coastal Hector’s dolphins	The Journal of the Acoustical Society of America		10.1121/1.3075600	http://asa.scitation.org/doi/10.1121/1.3075600	Toothed whales depend on echolocation for orientation and prey localization, and source parameters of echolocation clicks from free-ranging animals therefore convey valuable information about the acoustic physiology and behavioral ecology of the recorded species. Recordings of wild hourglass (Lagenorhynchus cruciger) and Hector's dolphins (Cephalorhynchus hectori) were made in the Drake Passage (…	125	3	1783-1791
Journal article	2004	King, R.; Brooks, S. P.	Bayesian analysis of the Hector's dolphin data. [Análisis bayesiano de datos del delfín de Héctor.]	Animal Biodiversity and Conservation				Bayesian analysis of the Hector's Dolphin data.- In recent years there have been increasing concerns for many wildlife populations, due to decreasing population trends. This has led to the introduction of management schemes to increase the survival rates and hence the population size of many species of animals. We concentrate on a particular dolphin population situated off the coast of New Zealan…	27	1	343-354
Report	2005	Duignan, Pádraig J; Jones, Gareth W; New Zealand; Department of Conservation	Autopsy of cetaceans including those incidentally caught in commercial fisheries, 2002/03					Morphological characteristics, estimated age, gender, reproductive status, stomach contents and cause of death have been determined for 11 Hector's dolphins (Cephalorhynchus hectori hectori), one Maui's dolphin (Cephalorhynchus hectori maui), four common dolphins (Delphinus delphis), and one bottlenose dolphin (Tursiops truncatus). The common dolphins and one Hector's dolphin were killed incident…			21			DOC Science Internal Series	Dept. of Conservation	Wellington, N.Z.
Journal article	2000	Slooten, Elisabeth; Fletcher, David; Taylor, Barbara L.	Accounting for Uncertainty in Risk Assessment: Case Study of Hector's Dolphin Mortality due to Gillnet Entanglement	Conservation Biology		10.1046/j.1523-1739.2000.00099-411.x	http://doi.wiley.com/10.1046/j.1523-1739.2000.00099-411.x	Uncertainties about biological data and human effects often delay decisions on management of endangered species. Some decision makers argue that uncertainty about the risk posed to a species should lead to precautionary decisions, whereas others argue for delaying protective measures until there is strong evidence that a human activity is having a serious effect on the species. The authors have d…	14	5	1264-1270
Book	2013	Berkenbusch, Katrin; Abraham, Edward R; Torres, L. G; New Zealand; Ministry for Primary Industries	New Zealand marine mammals and commercial fisheries		978-0-478-42317-4		http://fs.fish.govt.nz/Page.aspx?pk=113&dk=23493
Book section	2002	Pilcher, F. B.; Slooten, E.; Dawson, S. M.	Hector’s dolphins and fisheries in New Zealand: A species at risk	Marine Mammals: Fisheries, Tourism and Management Issues	978-0-643-06953-4						153-173				CSIRO Publishing	Collingwood, Victoria, Australia
Journal article	2016	Cryer, Martin; Mace, Pamela M.; Sullivan, Kevin J.	New Zealand's ecosystem approach to fisheries management	Fisheries Oceanography		10.1111/fog.12088	http://doi.wiley.com/10.1111/fog.12088	In 1986, New Zealand introduced a radical new quota management system (QMS) based on individual transferable quotas (ITQ) for most of its key fisheries. New Zealand's QMS focuses primarily on the management of individual fish stocks through the setting of total allowable catches (TAC) and total allowable commercial catches (TACC, allocated as ITQ) and is therefore essentially a single species‐foc…	25		57-70
Journal article	2017	Palliser, Anna; Dodson, Giles	Uncertainty, complexity and controversy in dolphin threat management: A role for post-normal science?	Environmental Science & Policy		10.1016/j.envsci.2017.09.004	https://linkinghub.elsevier.com/retrieve/pii/S1462901117305361	Managing fishing threats to populations of endemic, threatened Hector’s and Māui dolphins around New Zealand is a complex and controversial issue, underpinned by uncertain scientific knowledge. As such, it can be argued that it falls into the realm of post-normal science, which advocates transparency about uncertainties and stakeholder peer review of knowledge feeding into decision-making. This p…	78		74-80
Journal article	2000	Pichler, F.B; Baker, C.S	Loss of genetic diversity in the endemic Hector's dolphin due to fisheries-related mortality	Proceedings of the Royal Society of London. Series B: Biological Sciences		10.1098/rspb.2000.0972	https://royalsocietypublishing.org/doi/10.1098/rspb.2000.0972	The endemic New Zealand Hector's dolphin is considered the rarest species of marine dolphin with a total abundance of less than 4000. The species is listed as vulnerable because of fisheries-related mortality due to entanglement in set nets. The vulnerability of this species is further increased by its fidelity to local natal ranges and the genetic isolation of regional populations. Here we prese…	267	1438	97-102
Thesis	2015	Miller, E. J.	Ecology of Hector's dolphin (Cephalorhynchus hectori): Quantifying diet and investigating habitat selection at Banks Peninsula				http://hdl.handle.net/10523/5490	Hector’s dolphins (Cephalorhynchus hectori) are endangered and endemic to New Zealand. Although their distribution and abundance have been thoroughly described, little is known about Hector’s dolphin ecology. Being small cetaceans living in a cold water environment, Hector’s dolphins have high energy requirements, and prey abundance and movements are often assumed to be a major driver of distribu…				183			University of Otago	Dunedin, New Zealand
Journal article	2012	Miller, Elanor; Lalas, Chris; Dawson, Steve; Ratz, Hiltrun; Slooten, Elisabeth	Hector's dolphin diet: The species, sizes and relative importance of prey eaten by Cephalorhynchus hectori, investigated using stomach content analysis	Marine Mammal Science		10.1111/j.1748-7692.2012.00594.x	http://doi.wiley.com/10.1111/j.1748-7692.2012.00594.x	Stomach contents of 63 Hector's dolphins ( Cephalorhynchus hectori) were collected between 1984 and 2006 from throughout New Zealand to provide the first quantitative assessment of prey composition. Twenty-nine taxa were identified. Those most commonly consumed were red cod ( Pseudophycis bachus), ahuru ( Auchenoceros punctatus), arrow squid ( Nototodarus sp.), sprat ( Sprattus sp.), sole ( Pelto…			n/a-n/a
Report	2008	Dawson, S.; Slooten, E.; Scali, S.	Acoustic monitoring of Hector’s dolphin presence in Akaroa Harbour: A preliminary analysis				http://whaledolphintrust.org.nz/wp-content/uploads/Akaroa-POD-monitoring.pdf	Executive Summary 1. Passive echolocation detectors (T-PODs) were used at three sites in Akaroa harbour to monitor dolphin presence through the period 16 February 2007 to 18 February 2008 2. The three sites represent inner, mid and outer harbour habitats, and are areas in which amateur gillnetting takes place. 3. Each echolocation detector successfully collected data over 336-359 days (Average = …			10				New Zealand Whale and Dolphin Trust
Journal article	2019	Brownell Jr, Rl; Reeves, Rr; Read, Aj; Smith, Bd; Thomas, Po; Ralls, K; Amano, M; Berggren, P; Chit, Am; Collins, T; Currey, R; Dolar, Mll; Genov, T; Hobbs, Rc; Kreb, D; Marsh, H; Zhigang, M; Perrin, Wf; Phay, S; Rojas-Bracho, L; Ryan, Ge; Shelden, Kew; Slooten, E; Taylor, Bl; Vidal, O; Ding, W; Whitty, Ts; Wang, Jy	Bycatch in gillnet fisheries threatens Critically Endangered small cetaceans and other aquatic megafauna	Endangered Species Research		10.3354/esr00994	https://www.int-res.com/abstracts/esr/v40/p285-296/	The conservation status of small cetaceans has significantly worsened since the 1980s, when the baiji was the only species of small cetacean listed as Endangered by IUCN. Now the baiji is almost certainly extinct and 13 other species, subspecies, or populations (hereafter units-to-conserve or units) of small cetaceans are listed as Critically Endangered (CR) on the IUCN Red List. Bycatch is the m…	40		285-296
Hector's dolphin - Stress/Disease
Thesis	2018	Wickman, Lindsay Marie	Estimating mark rate and its effect on the precision of estimates of survival rate for a long-term study of Hector’s dolphins (Cephalorhynchus hectori) at Banks Peninsula, NZ				http://hdl.handle.net/10523/7990	An accurate and precise estimate of mark rate (the proportion of individuals with marks suitable for photo-ID) is essential for adjusting estimates of abundance from capture-recapture models to include the unmarked portion of the population. Capture-recapture analyses on marine mammals typically assume that mark rate is constant over time, but this may not be true if management has decreased the …				137			University of Otago	Dunedin, New Zealand
Journal article	2005	Orams, MARK	Dolphins, whales and ecotourism in New Zealand: What are the impacts and how should the industry be managed	Nature-based tourism in peripheral areas: Development or disaster							231-45
Report	2015	DAYA-WINTERBOTTOM, Trevor; MORGAN, Gay; BAVA, Roshni; CALDERWOOD, Mark; CHEN, Michelle; FOSTER, Natalie; HANSARD, Ben; THOMSON, Sarah; TULLOCH, Jaime-Anne	The effectiveness of the precautionary principle in endangered species protection (marine mammals) in New Zealand				https://www.iucn.org/sites/dev/files/precautionary_principle_and_endangered_species_in_new_zealand.pdf	The legal and natural resource governance issue evaluated by the New Zealand team was the effectiveness of the integration of the precautionary principle into the legal regime intended to protect endangered species. New Zealand’s economy is export and tourism reliant, and having a pristine ecologically sound physical environment is a major tourism draw. The thinking was that because this topic is…			12			International Union for the Conservation of Nature’s Environmental Law Centre’s	University of Waikato	Hamilton, New Zealand
Journal article	2009	Heimeier, Dorothea; Baker, C. Scott; Russell, Kirsty; Duignan, Pádraig J.; Hutt, Alistair; Stone, Gregory S.	Confirmed expression of MHC class I and class II genes in the New Zealand endemic Hector's dolphin ( <i>Cephalorhynchus hectori</i> )	Marine Mammal Science		10.1111/j.1748-7692.2008.00244.x	http://doi.wiley.com/10.1111/j.1748-7692.2008.00244.x	We provide the first description and confirmation of expression for three Major Histocompatibility Complex (MHC) genes (DQA, DQB, and class I) in the New Zealand endemic Hector's dolphin (Cephalorhynchus hectori). Sequences were derived from cDNA generated from peripheral blood leukocyte mRNA collected during a temporary live capture of two Hector's dolphins. The complete exons 2 and 3 of DQA, DQ…	25	1	68-90
Journal article	2019	Lehnert, K.; Poulin, R.; Presswell, B.	Checklist of marine mammal parasites in New Zealand and Australian waters	Journal of Helminthology		10.1017/S0022149X19000361	https://www.cambridge.org/core/product/identifier/S0022149X19000361/type/journal_article	Marine mammals are long-lived top predators with vagile lifestyles, which often inhabit remote environments. This is especially relevant in the oceanic waters around New Zealand and Australia where cetaceans and pinnipeds are considered as vulnerable and often endangered due to anthropogenic impacts on their habitat. Parasitism is ubiquitous in wildlife, and prevalence of parasitic infections as …	93	6	649-676
Journal article	1986	Hutton, J; Blair, D; Slooten, E; Dawson, Sm	Case studies of fluke-induced lesions in mesenteric lymph nodes of Hector's dolphins Cephalorhynchus hectori	Diseases of Aquatic Organisms		10.3354/dao002083	http://www.int-res.com/articles/dao/2/d002p083.pdf	Hector's dolphins Cephalorhynchus hectori dissected at Christchurch, New Zealand, in 1985 had granulomatous lesions of the rnesenteric lymph node. Histological examination revealed fluke eggs with associated inflammatory responses. In Case 1, a single fluke, probably of the genus Campula (Family Campuhdae) was recovered intact from the lesion. A similar fluke was also seen in sections cut of mate…	2		83-86
Journal article	2017	Buckle, Kelly; Roe, Wendi D.; Howe, Laryssa; Michael, Sarah; Duignan, Padraig J.; Burrows, E.; Ha, Hye Jeong; Humphrey, Sharon; McDonald, Wendy L.	Brucellosis in Endangered Hector’s Dolphins <i>(Cephalorhynchus hectori)</i>	Veterinary Pathology		10.1177/0300985817707023	http://journals.sagepub.com/doi/10.1177/0300985817707023	Brucella spp infections of marine mammals are often asymptomatic but have been associated with reproductive losses and deaths. Zoonotic infections originating from marine isolates have also been described. Hector's dolphins (Cephalorhynchus hectori) are an endangered species with a declining population, and the role of infectious disease in population dynamics is not fully understood. In this stu…	54	5	838-845
Journal article	2020	Roberts, Jim O.; Jones, Hannah F. E.; Roe, Wendi D.	The effects of Toxoplasma gondii on New Zealand wildlife: implications for conservation and management	Pacific Conservation Biology		10.1071/PC20051	http://www.publish.csiro.au/?paper=PC20051	Toxoplasma gondii is a globally widespread protozoan parasite that can infect all bird and mammal species. Cat species (Felidae) are the only known definitive host for T. gondii and this parasite should have been absent from New Zealand prior to the introduction of the domestic cat (Felis catus) in the 18th Century. Clinical toxoplasmosis has recently been reported in multiple wild-living New Zea…
Journal article	2013	Roe, W.D.; Howe, L.; Baker, E.J.; Burrows, L.; Hunter, S.A.	An atypical genotype of Toxoplasma gondii as a cause of mortality in Hector's dolphins (Cephalorhynchus hectori)	Veterinary Parasitology		10.1016/j.vetpar.2012.11.001	https://linkinghub.elsevier.com/retrieve/pii/S0304401712005675	Hector''s dolphins (Cephalorhynchus hectori) are a small endangered coastal species that are endemic to New Zealand. Anthropogenic factors, particularly accidental capture in fishing nets, are believed to be the biggest threat to survival of this species. The role of infectious disease as a cause of mortality has not previously been well investigated. This study investigates Toxoplasma gondii inf…	192	2021-01-03	67-74
Southern resident killer whale - Climate change/Anthropogenic
Thesis	2019	Barnes-Crouse, C. J.	Whale Watching in the Salish Sea: A Case Study of On-board Interpretation and Willingness to Protect the Marine Environment				http://hdl.handle.net/1773/44358	This study presents findings on the information provided in the interpretation on whale watching tours in the Salish Sea, on the western coast of the United States, and examines its influence on tour passengers’ willingness to act to protect the marine environment. Participant observation was conducted to observe the interpretation and a pen-and-paper questionnaire was administered to passengers …				32			University of Washington	Seattle, WA
Thesis	2020	Fraser, M.	Whale and Small Vessel Interactions: exploring regulatory compliance and management implications in the Salish Sea				http://hdl.handle.net/1828/12063	Compliance is a key feature for the management of non-consumptive wildlife viewing, as it can link management measures to performance and aid in developing recommendations that promote sustainable practices. Whale watching is a prominent wildlife viewing industry that is steadily rising in demand around the world. Managing vessel-cetacean encounters and operator behaviour (both commercial and rec…				83			University of Victoria	Victoria, British Columbia
Thesis	2019	Whitley, M.	Using App Design to Implement Behavior Changes to Support the Southern Resident Orca				https://vault.mcad.edu/islandora/object/MASD%3A75	This project’s objective is to use sustainability techniques and principles along with habit-forming technology to create long-term, measurable change in the relationship between the PNW human community and the SRKW. The future of a sustainable Salish Sea ecosystem depends on a period of restoration and habitat recovery. Understanding the complex system of the Salish Sea and how even the most min…				45			Minneapolis College of Art and Design	Minneapolis, MN
Journal article	2012	Xu, Jinshan; Deng, Z. Daniel; Carlson, Thomas J.; Moore, Brian	Target Strength of Southern Resident Killer Whales ( <i>Orcinus orca</i> ): Measurement and Modeling	Marine Technology Society Journal		10.4031/MTSJ.46.2.2	https://www.ingentaconnect.com/content/10.4031/MTSJ.46.2.2	A major criterion for permitting the deployment of tidal turbines in Washington State’s Puget Sound is management of risk of injury to killer whales from collision with moving turbine blades. An active monitoring system is being proposed to detect and track killer whales within proximity of turbines and alert turbine operators of their presence and location to permit temporary turbine shutdown wh…	46	2	74-84
Journal article	2017	Seely, Elizabeth; Osborne, Richard W.; Koski, Kari; Larson, Shawn	Soundwatch: Eighteen years of monitoring whale watch vessel activities in the Salish Sea	PLOS ONE		10.1371/journal.pone.0189764	https://dx.plos.org/10.1371/journal.pone.0189764	The Soundwatch Boater Education Program is a vessel monitoring and public education outreach program. Soundwatch has been run by The Whale Museum (TWM) during the whale watch season (May through September) in the Haro Strait Region of the Central Salish Sea since 1993. Data collection has been in a consistent manner since 1998 and is presented here. The program compiles data on vessel types and v…	12	12	e0189764
Magazine article	2006	Olsen, K.	ORCAS ON THE EDGE.	National Wildlife (World Edition)			https://www.nwf.org/Magazines/National-Wildlife/2006/Orcas-on-the-Edge	The article discusses dangers to the whale population of Puget Sound, Washington which would also affect the area's multimillion dollar whale watching industry. Three orca pods living in Puget Sound from May through October, known as the southern resident killer whale population, were declared federally endangered late last year by the National Marine Fisheries Service (NMFS), the federal agency …	44	6	22-30
Journal article	2002	Jelinski, D.E.; Krueger, C.C.; Duffus, D.A.	Geostatistical analyses of interactions between killer whales (Orcinus orca) and recreational whale-watching boats	Applied Geography		10.1016/S0143-6228(02)00051-6	https://linkinghub.elsevier.com/retrieve/pii/S0143622802000516	Johnstone Strait in coastal British Columbia, Canada, is a core habitat for seasonal concentrations of killer whales (Orcinus orca), which have attracted considerable attention from commercial whale-watching operators and recreational boaters. Within the Strait lies the Robson Bight-Michael Bigg Ecological Reserve, a marine reserve set aside as critical habitat for killer whales and closed to rec…	22	4	393-411
Journal article	2016	Williams, Rob; Thomas, Len; Ashe, Erin; Clark, Christopher W.; Hammond, Philip S.	Gauging allowable harm limits to cumulative, sub-lethal effects of human activities on wildlife: A case-study approach using two whale populations	Marine Policy		10.1016/j.marpol.2016.04.023	https://linkinghub.elsevier.com/retrieve/pii/S0308597X16301956	As sublethal human pressures on marine wildlife and their habitats increase and interact in complex ways, there is a pressing need for methods to quantify cumulative impacts of these stressors on populations, and policy decisions about allowable harm limits. Few studies quantify population consequences of individual stressors, and fewer quantify synergistic effects. Incorporating all sources of u…	70		58-64
Journal article	2006	Williams, Rob; Lusseau, David; Hammond, Philip S.	Estimating relative energetic costs of human disturbance to killer whales (Orcinus orca)	Biological Conservation		10.1016/j.biocon.2006.06.010	https://linkinghub.elsevier.com/retrieve/pii/S0006320706002874	This study examined the activities of "northern resident" killer whales (Orcinus orca) in Johnstone Strait, British Columbia, Canada, in July and August, from 1995 to 2002. Disturbance from boat traffic has been identified as a conservation concern for this population. The primary aims of the study were to test whether boat presence altered whales' activities, and if so, to estimate whether behav…	133	3	301-311
Journal article	2013	Busch, D. Shallin; Greene, Correigh M.; Good, Thomas P.	Estimating Effects of Tidal Power Projects and Climate Change on Threatened and Endangered Marine Species and Their Food Web: Tidal Power and Climate Change	Conservation Biology		10.1111/cobi.12164	http://doi.wiley.com/10.1111/cobi.12164	Marine hydrokinetic power projects will operate as marine environments change in response to increased atmospheric carbon dioxide concentrations. We considered how tidal power development and stressors resulting from climate change may affect Puget Sound species listed under the U.S. Endangered Species Act (ESA) and their food web. We used risk tables to assess the singular and combined effects o…	27	6	1190-1200
Book section	2012	Noren, Dawn P.; Dunkin, Robin C.; Williams, Terri M.; Holt, Marla M.	Energetic Cost of Behaviors Performed in Response to Vessel Disturbance: One Link in the Population Consequences of Acoustic Disturbance Model	The Effects of Noise on Aquatic Life	978-1-4419-7310-8 978-1-4419-7311-5		http://link.springer.com/10.1007/978-1-4419-7311-5_97		730		427-430				Springer New York	New York, NY
Journal article	2009	Williams, R; Bain, De; Smith, Jc; Lusseau, D	Effects of vessels on behaviour patterns of individual southern resident killer whales Orcinus orca	Endangered Species Research		10.3354/esr00150	http://www.int-res.com/abstracts/esr/v6/n3/p199-209/	Southern resident killer whales numbered only 84 ind. in 2004. Disturbance by vessels may be a factor in the population’s endangered status. To determine the importance of this factor, we compared behaviour in the presence and absence of vessels from 2003 to 2005 at 2 different sites along San Juan Island, Washington State, USA. Theodolite tracks were summarised in terms of swimming path directne…	6		199-209
Journal article	2013	Z. Daniel, Deng; Thomas J., Carlson; Tao, Fu; Huiying, Ren; Jayson J., Martinez; Joshua R., Myers; Shari A., Matzner; Eric Y., Choi; Andrea E., Copping	Design and Implementation of a Marine Animal Alert System to Support Marine Renewable Energy	Marine Technology Society Journal		10.4031/MTSJ.47.4.2	https://www.ingentaconnect.com/content/10.4031/MTSJ.47.4.2	Abstract Power extracted from fast-moving tidal currents has been identified as a potential commercial-scale source of renewable energy. Marine and hydrokinetic (MHK) device developers and utilities are pursuing deployment of prototype tidal turbines to assess technology viability, site feasibility, and environmental interactions. Deployment of prototype turbines requires environmental review and…	47	4	113-121
Journal article	1976	Mart, J.	COSMIC PLOT - LAST CATCH OF KILLER WHALES IN PUGET SOUND	Oceans			http://navalmarinearchive.com/collections/oceans_csv.html		9	3	56-59
Journal article	2021	McWhinnie, Lauren H.; O'Hara, Patrick D.; Hilliard, Casey; Le Baron, Nicole; Smallshaw, Leh; Pelot, Ronald; Canessa, Rosaline	Assessing vessel traffic in the Salish Sea using satellite AIS: An important contribution for planning, management and conservation in southern resident killer whale critical habitat	Ocean & Coastal Management		10.1016/j.ocecoaman.2020.105479	https://linkinghub.elsevier.com/retrieve/pii/S0964569120303860	In the Salish Sea, a body of water spanning British Columbia, Canada, and Washington State, USA, increasing vessel traffic has the potential to cause many direct and indirect impacts on an endangered population of cetaceans; Southern Resident Killer Whales (SRKW) (Orcinus orca). This study uses satellite Automatic Identification System (AIS) data to provide a detailed description of the volume, d…	200		105479
Journal article	2006	Williams, Rob; Lusseau, David	A killer whale social network is vulnerable to targeted removals	Biology Letters		10.1098/rsbl.2006.0510	https://royalsocietypublishing.org/doi/10.1098/rsbl.2006.0510	Individuals play various roles in maintaining social integrity of mammalian populations. However, many models developed for managing wildlife resources assume that all individuals are equal. Killer whales are social animals that rely on relationships within and among family groups for survival. In the northeastern Pacific, fish-eating, ‘resident’ killer whale populations are composed of matriline…	2	4	497-500
Journal article	2009	Lusseau, D; Bain, De; Williams, R; Smith, Jc	Vessel traffic disrupts the foraging behavior of southern resident killer whales Orcinus orca	Endangered Species Research		10.3354/esr00154	http://www.int-res.com/abstracts/esr/v6/n3/p211-221/	Vessel traffic may have contributed to southern resident killer whales Orcinus orca becoming endangered. To determine the importance of this threat, we measured the behavior of southern residents in the presence and absence of vessels from 2003 to 2005 at 2 different sites along San Juan Island, Washington, USA. We observed activity states of killer whale schools using scan sampling and collected…	6		211-221
Thesis	2014	Giles, D. A.	Southern Resident Killer Whales (Orcinus orca): The evolution of adaptive management practices for vessel-based killer whale watching in the Salish Sea, A novel non-invasive method to study southern resident killer whales (Orcinus orca) and vessel compliance with regulations, and The effect of vessels on group cohesion and behavior of southern resident killer whales (Orcinus orca)				https://pqdtopen.proquest.com/doc/1557685186.html?FMT=ABS	This dissertation concerns the southern resident killer whales (Orcinus orca), a genetically isolated population of fish-eating killer whales that frequent the international waters of the Salish Sea between the United States and Canada in the eastern Pacific Ocean. Research was conducted from June 1 to October 31, 2007 and from June 7 to October 31, 2008, between geographic coordinates: 48˚12′ to…				125			University of California, Davis	Davis, CA
Presentation	2018	Shaikh, S.; Wong, C.; Rylko, M.; Hass, T.	Cumulative Effects on Southern Resident Killer Whales (Orcinus orca)				https://cedar.wwu.edu/ssec/2018ssec/allsessions/603/	A suite of anthropogenic threats threaten the survival and recovery of the Salish Sea’s endangered Southern Resident Killer Whale population (SRKW). With their population level at a historic low (78 individuals as of 2018), this session focused on how to assess and manage the cumulative effects of the threats SRKW face.								Seattle, WA
Journal article	2021	Holt, Marla M.; Tennessen, Jennifer B.; Ward, Eric J.; Hanson, M. Bradley; Emmons, Candice K.; Giles, Deborah A.; Hogan, Jeffrey T.	Effects of Vessel Distance and Sex on the Behavior of Endangered Killer Whales	Frontiers in Marine Science		10.3389/fmars.2020.582182	https://www.frontiersin.org/articles/10.3389/fmars.2020.582182/full	Accurate knowledge of behavior is necessary to effectively manage the effects of human activities on wildlife, including vessel-based whale-watching. Yet, the wholly aquatic nature of cetaceans makes understanding their basic behavioral ecology quite challenging. An endangered population of killer whales faces several identified threats including prey availability and disturbance from vessels and…	7		582182
Thesis	2017	Fretwell, K.	Exploring the issue of cumulative shipping impacts in the Salish Sea though a systematic focal species assessment framework [graduate project].					The cumulative impacts of shipping on the Salish Sea ecosystem have been an issue of concern in recent years, exacerbated by a number of project proposals that could substantially increase the already high levels of ship traffic. Potential threats from ship traffic include chronic and catastrophic oil spills, acoustic and physical disturbance, ship strikes, and wake wave disturbance. These primar…				118			Dalhousie University	Halifax, Nova Scotia, Canada
Thesis	2019	Chicote, T.	Evaluation of Cumulative Environmental Effects on the Endangered Southern Resident Killer Whales				https://prism.ucalgary.ca/handle/1880/111109	With only 74 members left, the Southern Resident Killer Whales (SRKW) of the Salish Sea, are endangered under the Canadian Species at Risk Act (DFO, 2018) and the United States Endangered Species Act (US EPA, 2017). The Trans Mountain Expansion Project became a nationwide topic when the Project approval was overturned by the Federal Court of Appeal in August 2018, who cited lack of review of the …				90			University of Calgary	Calgary, Alberta, Canada
Book section	2014	Higham, J.; Bejder, L.; Williams, R.; Bain, D. E.; Trites, A. W.	Energetic linkages between short-term and long-term effects of whale-watching disturbance on cetaceans	Whale-watching: sustainable tourism and ecological management	978-1-139-01816-6			Many studies have demonstrated short-term behavioural responses by whales and dolphins in the presence of vessels, but the population-level implications of such changes are poorly understood (Lusseau, 2003, 2004; Bejder et al., 2006a; Lusseau & Bejder, 2007). One means for developing such an understanding is to use a modelling framework such as the Population Consequences of Acoustic Disturbance …			206-228				Cambridge University Press	Cambridge, United Kingdom
Journal article	2019	YASUTAKE, M.; Lipka, J.; Vidal, S.	Anthropogenic Impacts on Southern Resident Killer Whales: Implications for Conservation Strategies	TRAIL SIX			https://trailsix.geog.ubc.ca/files/2019/03/TRAIL_SIX_Volume_13_online.pdf#page=79	Southern Resident Killer Whale (SRKW) populations are on a steep decline due to major threats such as reduced prey abundance, ocean pollutants, and marine noise from vessel traffic. An analysis was conducted to determine the geographical scope of these threats, as well as to identify critical disturbance areas using vessel traffic, pollution, and commercial fisheries datasets. The study was quant…	13		79-91		Undergraduate Journal of Geography
Conference paper	2016	Noren, Dawn P.; Holt, Marla M.; Dunkin, Robin C.; Thometz, Nicole M.; Williams, Terrie M.	Comparative and cumulative energetic costs of odontocete responses to anthropogenic disturbance			10.1121/2.0000357	http://asa.scitation.org/doi/abs/10.1121/2.0000357	Odontocetes respond to vessels and anthropogenic noise by modifying vocal behavior, surface active behaviors, dive patterns, swim speed, direction of travel, and activity budgets. Exposure scenarios and behavioral responses vary across odontocetes. A literature review was conducted to determine relevant sources of disturbance and associated behavioral responses for several odontocete species (bot…	27		40011					Salt Lake City, Utah
Thesis	2016	Hamlin, H.	An interview-based cognitive analysis of stakeholder perceptions of whale watching in Puget Sound, Washington				https://digital.lib.washington.edu/researchworks/handle/1773/36744	Since 1986, when the commercial whaling moratorium was established, whale watching has become a prominent tourism industry. Accompanying this increase in the industry is the conflict between different stakeholders on the best management practices, protection guidelines and business plans that should be incorporated in whale watching. As whale watching in Puget Sound, Washington becomes increasing…				70			University of Washington	Seattle, WA
Report	2006	Bain, D. E.; Smith, J. C.; Williams, R.; Lusseau, D.	Effects of vessels on behavior of southern resident killer whales (Orcinus spp.)				http://orcarelief.org/docs/bain%202006%20nmfsrep2003_4final.pdf	Vessel traffic may have contributed to Southern Resident Killer Whales becoming endangered. To determine the importance of this threat, we measured behavior of Southern Residents in the presence and absence of vessels in 2003 and 2004 at two different sites along San Juan Island. Data collected include: theodolite tracks of focal individuals, along with observations of their behavior; and scan sa…			62
Journal article	2012	Giles, Deborah A.; Koski, Kari L.	Managing Vessel-Based Killer Whale Watching: A Critical Assessment of the Evolution From Voluntary Guidelines to Regulations in the Salish Sea	Journal of International Wildlife Law & Policy		10.1080/13880292.2012.678792	http://www.tandfonline.com/doi/abs/10.1080/13880292.2012.678792		15	2	125-151
Journal article	2014	Hartman, W.; VanderZwaag, D.; Fennel, K.	Recovery planning for pacific marine species at risk in the wake of climate change and ocean acidification: Canadian practice, future courses	Journal of Environmental Law and Practice				This article evaluates how Canadian recovery planning for Pacific marine species at risk incorporates two pressing 21st century concerns: global climate change and ocean acidification (OA). While many recovery strategies for Pacific species at risk show some understanding of climate change or OA, they generally fail to incorporate key climate and OA information or to consider how these two issues…	27		23-56
Southern resident killer whale - Management
Journal article	2013	Bradley Hanson, M.; Emmons, Candice K.; Ward, Eric J.; Nystuen, Jeffrey A.; Lammers, Marc O.	Assessing the coastal occurrence of endangered killer whales using autonomous passive acoustic recorders	The Journal of the Acoustical Society of America		10.1121/1.4821206	http://asa.scitation.org/doi/10.1121/1.4821206	Using moored autonomous acoustic recorders to detect and record the vocalizations of social odonotocetes to determine their occurrence patterns is a non-invasive tool in the study of these species in remote locations. Acoustic recorders were deployed in seven locations on the continental shelf of the U.S. west coast from Cape Flattery, WA to Pt. Reyes, CA to detect and record endangered southern …	134	5	3486-3495
Report	2004	Krahn, M. M.; Ford, M. J.; Perrin, W. F.; Wade, P. R.; Angliss, R. P.; Hanson, M. B.; Taylor, B. L.; Ylitalo, G. M.; Dahlheim, M. E.; Stein, J. E.; Waples, R. S.	2004 Status Review of Southern Resident Killer Whales (Orcinus orca) under the Endangered Species Act				https://repository.library.noaa.gov/view/noaa/17424				95				NOAA Northwest Fisheries Science Center
Report	2002	Krahn, M. M.; Wade, P. R.; Kalinowski, S. T.; Dahlheim, M. E.; Taylor, B. L.; Hanson, M. B.; Ylitalo, G. M.; Angliss, R. P.; Stein, J. E.; Waples, R. S.	Status Review of Southern Resident Killer Whales (Orcinus orca) under the Endangered Species Act								159				NOAA Fisheries, Northwest Fisheries Science Center	Seattle, WA
Presentation	2016	Barrett-Lennard, Lance; Durban, John; Fearnbach, Holly	Assessment of Resident Killer Whale Body Condition Using Aerial Photogrammetry and Possible Implications for Salmon Management				https://cedar.wwu.edu/ssec/2016ssec/species_food_webs/93/	The southern resident killer whale population is listed as endangered in both the US and Canada and its critical habitat in the trans-border area of the Salish Sea is legally recognized by both countries. Resident killer whales feed on fish, principally salmon, and a multi-year period of low Chinook salmon abundance coastwise was associated with a spike the mortality rates of both populations (Fo…								Vancouver, British Columbia
Journal article	2014	Roberge, Jean-Michel	Using data from online social networks in conservation science: which species engage people the most on Twitter?	Biodiversity and Conservation		10.1007/s10531-014-0629-2	http://link.springer.com/10.1007/s10531-014-0629-2	Knowledge about the level of public attention toward different species is crucial to successful conservation. The evolution of online social networks offers new possibilities for collecting data about public interest. Building on an analysis of text messages on Twitter, this study aimed to quantify the level of public attention toward different mammal and bird species listed (at the full species …	23	3	715-726
Journal article	2009	Williams, Rob; Lusseau, David; Hammond, Philip S.	The role of social aggregations and protected areas in killer whale conservation: The mixed blessing of critical habitat	Biological Conservation		10.1016/j.biocon.2008.12.004	https://linkinghub.elsevier.com/retrieve/pii/S0006320708004710	Protected areas are often proposed as tools for conserving endangered populations of marine megafauna. Our study area includes a voluntary no-entry reserve embedded within wider critical habitat for Threatened 'northern resident' killer whales under Canada's Species at Risk Act. Our study quantified the reserve's importance to whales by assessing habitat preference in a behavioural context, and p…	142	4	709-719
Journal article	2016	Noren, Dawn P.; Hauser, Donna D. W.	Surface-Based Observations Can Be Used to Assess Behavior and Fine-Scale Habitat Use by an Endangered Killer Whale (Orcinus orca) Population	Aquatic Mammals		10.1578/AM.42.2.2016.168	http://www.aquaticmammalsjournal.org/index.php?option=com_content&view=article&id=1428:surface-based-observations-can-be-used-to-assess-behavior-and-fine-scale-habitat-use-by-an-endangered-killer-whale-orcinus-orca-population&catid=148&Itemid=157	Behavioral observations can provide insight into the ecology and habitat use of marine species. Studies have shown that movement patterns are influenced by prey availability and that the presence of vessels can reduce foraging, resting, and/or social behaviors in delphinids, including killer whales (Orcinus orca). Southern resident killer whales are listed as "Endangered" in both the United State…	42	2	168-183
Journal article	2007	Hauser, Ddw; Logsdon, Mg; Holmes, Ee; VanBlaricom, Gr; Osborne, Rw	Summer distribution patterns of southern resident killer whales Orcinus orca: core areas and spatial segregation of social groups	Marine Ecology Progress Series		10.3354/meps07117	http://www.int-res.com/abstracts/meps/v351/p301-310/	A diverse range of marine wildlife species respond to dynamic environments and patchy resources with variations in their distribution pattern. For many cetacean species, highly structured social systems add to the complexity of modeling distribution patterns and understanding the effects on population viability. Southern resident killer whales Orcinus orca are comprised of 3 distinct, yet cohesiv…	351		301-310
Journal article	2019	Riera, A; Pilkington, Jf; Ford, Jkb; Stredulinsky, Eh; Chapman, Nr	Passive acoustic monitoring off Vancouver Island reveals extensive use by at-risk Resident killer whale (Orcinus orca) populations	Endangered Species Research		10.3354/esr00966	https://www.int-res.com/abstracts/esr/v39/p221-234/	Two sympatric populations of fish-eating Resident killer whales inhabit the coastal waters of British Columbia, Canada: Southern and Northern Resident killer whales. These populations are listed under Canada's Species at Risk Act (SARA) as 'endangered' and 'threatened', respectively. Relatively little is known about their habitat use outside of the sheltered waters along the east coast of Vancouv…	39		221-234
Journal article	2017	Ellis, S.; Franks, D. W.; Nattrass, S.; Cant, M. A.; Weiss, M. N.; Giles, D.; Balcomb, K. C.; Croft, D. P.	Mortality risk and social network position in resident killer whales: sex differences and the importance of resource abundance	Proceedings of the Royal Society B: Biological Sciences		10.1098/rspb.2017.1313	https://royalsocietypublishing.org/doi/10.1098/rspb.2017.1313	An individual's ecological environment affects their mortality risk, which in turn has fundamental consequences for life-history evolution. In many species, social relationships are likely to be an important component of an individual's environment, and therefore their mortality risk. Here, we examine the relationship between social position and mortality risk in resident killer whales ( Orcinus …	284	1865	20171313
Journal article	2018	Ford, M. J.; Parsons, K. M.; Ward, E. J.; Hempelmann, J. A.; Emmons, C. K.; Bradley Hanson, M.; Balcomb, K. C.; Park, L. K.	Inbreeding in an endangered killer whale population	Animal Conservation		10.1111/acv.12413	http://doi.wiley.com/10.1111/acv.12413	There are genetic risks associated with small population sizes, including loss of genetic diversity and inbreeding depression. The southern resident killer whale Orcinus orca population is a group of ~80 whales listed as ‘endangered’ under the U.S. Endangered Species Act. Recovery efforts are focused on increasing prey and reducing impacts from environmental disturbance, but the population's smal…	21	5	423-432
Journal article	2014	Wong, Cecilia; Rylko, Michael	Health of the Salish Sea as measured using transboundary ecosystem indicators	Aquatic Ecosystem Health & Management		10.1080/14634988.2014.980209	https://www.tandfonline.com/doi/full/10.1080/14634988.2014.980209	The Salish Sea ecosystem is a transboundary area of ecological, social, and economic significance shared by Canada and the United States. Accordingly, the United States Environmental Protection Agency and Environment Canada have committed to cross-border collaboration on Salish Sea issues. The transboundary ecosystem indicators project was established to support knowledge sharing and to identify …	17	4	463-471
Journal article	2016	Foote, A D; Morin, P A	Genome-wide SNP data suggest complex ancestry of sympatric North Pacific killer whale ecotypes	Heredity		10.1038/hdy.2016.54	http://www.nature.com/articles/hdy201654	Three ecotypes of killer whale occur in partial sympatry in the North Pacific. Individuals assortatively mate within the same ecotype, resulting in correlated ecological and genetic differentiation. A key question is whether this pattern of evolutionary divergence is an example of incipient sympatric speciation from a single panmictic ancestral population, or whether sympatry could have resulted …	117	5	316-325
Journal article	2011	Williams, Rob; Krkošek, Martin; Ashe, Erin; Branch, Trevor A.; Clark, Steve; Hammond, Philip S.; Hoyt, Erich; Noren, Dawn P.; Rosen, David; Winship, Arliss	Competing Conservation Objectives for Predators and Prey: Estimating Killer Whale Prey Requirements for Chinook Salmon	PLoS ONE		10.1371/journal.pone.0026738	https://dx.plos.org/10.1371/journal.pone.0026738	Ecosystem-based management (EBM) of marine resources attempts to conserve interacting species. In contrast to single-species fisheries management, EBM aims to identify and resolve conflicting objectives for different species. Such a conflict may be emerging in the northeastern Pacific for southern resident killer whales (Orcinus orca) and their primary prey, Chinook salmon (Oncorhynchus tshawytsc…	6	11	e26738
Journal article	2010	Ashe, E.; Noren, D. P.; Williams, R.	Animal behaviour and marine protected areas: incorporating behavioural data into the selection of marine protected areas for an endangered killer whale population	Animal Conservation		10.1111/j.1469-1795.2009.00321.x	http://doi.wiley.com/10.1111/j.1469-1795.2009.00321.x	Like many endangered wildlife populations, the viability and conservation status of ‘southern resident’ killer whales Orcinus orca in the north-east Pacific may be affected by prey limitation and repeated disturbance by human activities. Marine protected areas (MPAs) present an attractive option to mitigate impacts of anthropogenic activities, but they run the risk of tokenism if placed arbitrari…	13	2	196-203
Thesis	1999	Osborne, R.	A historical ecology of Salish Sea 'resident' killer whales (Orcinus orca): With implications for management				https://dspace.library.uvic.ca/handle/1828/9090	The purpose of this study is to explore the implications of the historical perspective when it is linked to the ecological concept of adaptive management. The vehicle for this exploration is a genetically distinct population of killer whales (Orcinus orca), whose core coastal habitat includes the inland waters of Georgia Strait, Juan de Fuca Strait and Puget Sound; a geographic region referred to…				280			University of Victoria	Victoria, British Columbia
Journal article	2021	Kehoe, Laura J.; Lund, Jessie; Chalifour, Lia; Asadian, Yeganeh; Balke, Eric; Boyd, Sean; Carlson, Deborah; Casey, James M.; Connors, Brendan; Cryer, Nicolai; Drever, Mark C.; Hinch, Scott; Levings, Colin; MacDuffee, Misty; McGregor, Heidi; Richardson, John; Scott, David C.; Stewart, Daniel; Vennesland, Ross G.; Wilkinson, Chad E.; Zevit, Pamela; Baum, Julia K.; Martin, Tara G.	Conservation in heavily urbanized biodiverse regions requires urgent management action and attention to governance	Conservation Science and Practice		10.1111/csp2.310	https://onlinelibrary.wiley.com/doi/10.1111/csp2.310	Throughout history, humans have settled in areas of high biodiversity. Today these areas are home to our biggest urban centers with biodiversity at increasing risk from escalating cumulative threats. Identifying the management strategies to conserve species within such regions, and ensuring effective governance to oversee their implementation, presents enormous challenges. Using a novel Priority …	3	2
Report	2006	Ford, J. K. B.	An assessment of critical habitats of resident killer whales in waters off the Pacific coast of Canada				https://waves-vagues.dfo-mpo.gc.ca/Library/326892.pdf	Two populations of fish-eating killer whales, northern residents and southern residents, inhabit waters off Canada’s west coast. These populations are listed as threatened and endangered, respectively, under the Species-at-Risk Act (SARA) because of their small sizes, recent declining population trends, and the vulnerability of their habitat and food supply to anthropogenic impacts. As required b…							Fisheries and Oceans Canada, Science	Nanaimo, British Columbia
Journal article	2010	Teaney, D. D.	THE INSIGNIFICANT KILLER WHALE: A CASE STUDY OF INHERENT FLAWS IN THE WILDLIFE SERVICES'DISTINCT POPULATION SEGMENT POLICY AND A PROPOSED SOLUTION	Environmental Law							647-702
Thesis	2019	Wilk, S.	On the Brink of Extinction: The Fate of the Pacific Northwest's Southern Resident Killer Whales				https://scholarship.claremont.edu/cgi/viewcontent.cgi?article=1210&context=pomona_theses					86			Pomona College	Pomona, California
Journal article	2011	Samhouri, Jameal F.; Levin, Phillip S.; Andrew James, C.; Kershner, Jessi; Williams, Greg	Using existing scientific capacity to set targets for ecosystem-based management: A Puget Sound case study	Marine Policy		10.1016/j.marpol.2010.12.002	https://linkinghub.elsevier.com/retrieve/pii/S0308597X10002150	Human actions have altered the structure and function of coastal ecosystems worldwide. In many locations, the overall portfolio of goods, cultural amenities, and supporting services provided by the marine environment has deteriorated. Ecosystem-based management (EBM) offers significant promise for addressing these issues because it is a comprehensive and integrated approach designed to reconcile …	35	4	508-518
document	2008	National Marine Fisheries Service, Alaska Region	Recovery Plan for Southern Resident Killer Whales (Orcinus orca)				https://repository.library.noaa.gov/view/noaa/15975	This plan identifies a range of actions that will contribute to recovery of Southern Resident killer whales. Many of these actions will have a direct effect on killer whale habitat, but they will also help restore and improve a range of habitats, species and ecosystem processes. Although the recovery plan is focused on Southern Residents, the proposed actions will benefit many native species and …							National Oceanic and Atmospheric Administration, National Marine Fisheries …
Report	2017	Ford, J. K. B.; Pilkington, J.; Reira, A.; Otsuki, M.; Gisborne, B.; Abernethy, R. M.; Stredulinsky, E. H.; Towers, J. R.; Ellis, G. M.	Habitats of special importance to resident killer whales (Orcinus orca) off the west coast of Canada				https://waves-vagues.dfo-mpo.gc.ca/Library/40613586.pdf	Two populations of fish-eating Killer Whales, Northern Resident and Southern Resident, inhabit waters off Canada’s west coast. The populations were listed under the Species at Risk Act (SARA) as Threatened and Endangered, respectively, in 2003. As required by the SARA, efforts have since been underway to identify critical habitat for these populations. Partial critical habitat was identified for …			65				Fisheries and Oceans Canada, Science	Ottawa
Report	2014	L. Antonio Vélez‐Espino; Ford JKB; Araujo HA; G, Ellis; Parken CK; Balcomb K	Comparative demography and viability of northeast Pacific resident killer whale populations at risk				http://rgdoi.net/10.13140/RG.2.2.35274.57283				66				Fisheries and Oceans Canada, Science	Ottawa
Journal article	2019	Agardy, Tundi; Cody, Mary; Hastings, Sean; Hoyt, Erich; Nelson, Anne; Tetley, Michael; Notarbartolo di Sciara, Giuseppe	Looking beyond the horizon: An early warning system to keep marine mammal information relevant for conservation	Aquatic Conservation: Marine and Freshwater Ecosystems		10.1002/aqc.3072	https://onlinelibrary.wiley.com/doi/abs/10.1002/aqc.3072	Important marine mammal areas (IMMAs) are discrete portions of habitat, important to marine mammal species, that have the potential to be delineated and managed for conservation. Although IMMAs are not a blueprint for marine protected areas or other conservation designations, they are useful for providing a foundation for marine spatial planning and systematic conservation planning that can then …	29	S2	71-83
Magazine article	2018	Corrigan, B.	Living With Orcas: Protecting a vital resource—Puget Sound southern resident killer whales	Coast Guard Journal of Safety & Security at Sea, Proceedings of the Marine Safety & Security Council			http://digitaleditions.walsworthprintgroup.com/publication/?m=44587&i=479100&p=2		75	1	82-87
Report	2017	Hanson, M. B.; Ward, E. J.; Emmons, C. K.; Holt, M. M.; Holzer, D. M.	Assessing the movements and occurrence of southern resident killer whales relative to the US Navy’s Northwest Training Range Complex in the Pacific Northwest				https://www.noaa.gov/sites/default/files/atoms/files/0.7.115.6106-000004.pdf	1. Remotely deployed telemetry tags were used to assess the movements and occurrence ofthe whales in the winter, and passive acoustic recorders deployed in areas thought to be frequently used by the whales, were used to assess their seasonal occurrence in these areas. These data will be used to provide information to better understand their seasonal occurrence in relation to the U.S. Navy’s North…			30				NOAA Northwest Fisheries Science Center	Seattle, WA
Presentation	2018	Weiler, C.; Giles, D.; Asmutis-Silvia, R.	The Ecosystem Approach: Recovering rivers to help save the Southern Resident killer whales				https://cedar.wwu.edu/cgi/viewcontent.cgi?article=2492&context=ssec									Seattle, WA
Journal article	2019	Pritchett, M.	Risks and Recovery: A Multifaceted Outlook Towards Conservation of the Southern Resident Orca Population	Villanova Environmental Law Journal			https://digitalcommons.law.villanova.edu/cgi/viewcontent.cgi?article=1423&context=elj	An unequivocal icon of the Pacific Northwest, the Southern Resident orca (Southern Resident) spends its summer and fall months in the Salish Sea, an estuarine network of British Columbia and Washington State waterways. During these months, visitors and residents alike enjoy the opportunity to witness Southern Residents gathering in the inland waters surrounding the San Juan Islands, the Strait Ju…	30		223
Report	2007	Weber, M. L.; Laist, D. W.	The Status of Protection Programs for Endangered, Threatened, and Depleted Marine Mammals in U.S. Waters				https://www.mmc.gov/wp-content/uploads/WEBER_FINAL72407.pdf				174				Marine Mammal Commission
Journal article	2009	Goble, D. D.	The Endangered Species Act: What we talk about when we talk about recovery	Natural Resources Journal				The objective of the Endangered Species Act is to recover species that are at risk of extinction. The drafters of the Act shared a widely held assumption that recovery would follow an orderly progression: species at risk of extinction would be identified, the factors placing them at risk would be determined, the conservation methods needed to eliminate the threats would be determined and implemen…	49		1944-01-01
Web page	2009	Government of Canada, Environment Canada	ARCHIVED - Species at Risk Public Registry - Recovery Strategy for the Northern and Southern Resident Killer Whales (Orcinus orca) in Canada	Species at Risk Public Registry			https://www.sararegistry.gc.ca/default.asp?lang=En&n=0BA06406-1&printfullpage=true	The killer whale is the largest member of the dolphin family, Delphinidae. Its size, striking black and white colouring and tall dorsal fin are the main identifying characteristics. Killer whales are mainly black above and white below, with a white oval eye patch, and a grey saddle patch below the dorsal fin.
Report	2013	Ford, M. J.	Status review update of Southern Resident killer whales				https://media.fisheries.noaa.gov/dam-migration/srkw_status_revew_update_final_july_31_2013.pdf				41				NOAA Fisheries, Northwest Fisheries Science Center	Seattle, WA
Letter	2013	Ragen, T. J.	Listing a distinct population segment of a subspecies
Journal article	2020	Waltz, Danny	The “Embarrassing” Endangered Species Act: Beyond Collective Rights for Species	Columbia Journal of Environmental Law		10.7916/CJEL.V45I1.4731	https://journals.library.columbia.edu/index.php/cjel/article/view/4731		45	1	1955-01-01
document	2004	Wiles, Gary J	Washington State Status Report for the Killer Whale					Killer whales are distributed throughout the marine waters of Washington. Four populations are recognized and are referred to as southern residents, northern residents, transients, and offshores. These populations rarely interact and do not interbreed despite having largely sympatric year-round geographic ranges that extend into British Columbia and other areas along the west coast of North Ameri…
document	2016	Wiles, Gary J	Periodic Status Review for the Killer Whale					EXECUTIVE SUMMARY Killer whales have been listed as a state endangered species in Washington since 2004. Three main populations known as the southern residents, west coast transients, and offshores occur in the state. While closely similar in appearance, these ecotypes differ in their biology, rarely interact with one another, and do not interbreed despite having largely sympatric year-round dist…
Southern resident killer whale - Pollution
Presentation	2006	O'Neill, S. M.; Ylitalo, G. M.; West, J. E.; Bolton, J.; Sloan, C. A.; Krahn, M. M.	Regional patterns of persistent organic pollutants in five Pacific salmon species (Oncorhynchus spp) and their contributions to contaminant levels in northern and southern resident killer whales (Orcinus orca)				https://wdfw.wa.gov/sites/default/files/publications/01034/wdfw01034.pdf									NOAA Northwest Regional Office, Seattle, WA
Book	2018	Colby, J. M.	Orca: How We Came to Know and Love the Ocean's Greatest Predator		0-19-067309-5							408			Oxford University Press
Thesis	2019	Manteufel, Nicole L	EFFECTS OF INCREASED PCB & PBDE LEVELS ON SURVIVAL AND REPRODUCTION OF SOUTHERN RESIDENT KILLER WHALES				https://archives.evergreen.edu/masterstheses/Accession86-10MES/Thesis_MES_2019_ManteufelN.pdf	Southern resident killer whales (Orcinus orca) (SRKW) are an iconic species that live in the coastal waters of British Columbia, Washington, and Oregon, USA. There are three pods of the SRKWs consisting of J pod, K pod and L pod. These matriline pods of SRKWs are close-knit family members who stay near each other for life, and the SRKWs have demonstrated a unique culture that involves their prima…				58			The Evergreen State College	Olympia, Washington
Thesis	2020	Harlacher, J. M.	Whale, what do we have here? Evidence of microplastics in top predators: analysis of two populations of Resident killer whale fecal samples.				https://digital.lib.washington.edu/researchworks/handle/1773/46085	Environmental microplastics (plastic particles less than 5 mm in size) are a growing ecological issue and are widely documented in marine life. The consequences of microplastic ingestion in top predators are poorly understood but may include physiological and toxicological effects, and the potential for bioaccumulation in apex predators has been suggested. Here, I investigate the presence of micr…				51			University of Washington	Seattle, WA
Journal article	2007	Krahn, Margaret M.; Hanson, M. Bradley; Baird, Robin W.; Boyer, Richard H.; Burrows, Douglas G.; Emmons, Candice K.; Ford, John K.B.; Jones, Linda L.; Noren, Dawn P.; Ross, Peter S.; Schorr, Gregory S.; Collier, Tracy K.	Persistent organic pollutants and stable isotopes in biopsy samples (2004/2006) from Southern Resident killer whales	Marine Pollution Bulletin		10.1016/j.marpolbul.2007.08.015	https://linkinghub.elsevier.com/retrieve/pii/S0025326X07002846	"Southern Resident" killer whales include three "pods" (J, K and L) that reside primarily in Puget Sound/Georgia Basin during the spring, summer and fall. This population was listed as "endangered" in the US and Canada following a 20% decline between 1996 and 2001. The current study, using blubber/epidermis biopsy samples, contributes contemporary information about potential factors (i.e., levels…	54	12	1903-1911
Report	2003	Krahn, M. M.; Herman, D. P.; Ylitalo, G. M.; Sloan, C. A.; Burrows, D. G.; Hobbs, R. C.; Mahoney, B. A.; Yanagida, G. K.; Calambokidis, J.	Blubber stratification in white whales and killer whales: variability in contaminant concentrations, fatty acid profiles, lipid percent and lipid class profiles that has implications for biopsy sampling				https://heima.hafro.is/~gisli/iwc2003/sc55docs/SC-55-E3%5b1%5d.pdf				22				International Whaling Commission
Journal article	2018	Alava, Juan José; Cisneros-Montemayor, Andrés M.; Sumaila, U. Rashid; Cheung, William W. L.	Projected amplification of food web bioaccumulation of MeHg and PCBs under climate change in the Northeastern Pacific	Scientific Reports		10.1038/s41598-018-31824-5	http://www.nature.com/articles/s41598-018-31824-5	Climate change increases exposure and bioaccumulation of pollutants in marine organisms, posing substantial ecophysiological and ecotoxicological risks. Here, we applied a trophodynamic ecosystem model to examine the bioaccumulation of organic mercury (MeHg) and polychlorinated biphenyls (PCBs) in a Northeastern Pacific marine food web under climate change. We found largely heterogeneous sensitiv…	8	1	13460
Journal article	2009	Cullon, Donna L.; Yunker, Mark B.; Alleyne, Carl; Dangerfield, Neil J.; O'Neill, Sandra; Whiticar, Michael J.; Ross, Peter S.	PERSISTENT ORGANIC POLLUTANTS IN CHINOOK SALMON (ONCORHYNCHUS TSHAWYTSCHA): IMPLICATIONS FOR RESIDENT KILLER WHALES OF BRITISH COLUMBIA AND ADJACENT WATERS	Environmental Toxicology and Chemistry		10.1897/08-125.1	http://doi.wiley.com/10.1897/08-125.1	We measured persistent organic pollutant (POP) concentrations in chinook salmon (Oncorhynchus tshawytscha) in order to characterize dietary exposure in the highly contaminated, salmon-eating northeastern Pacific resident killer whales. We estimate that 97 to 99% of polychlorinated biphenyls (PCBs), polychlorinated dibenzo-p-dioxins (PCDDs), polychlorinated dibenzofurans (PCDFs), dichlorodiphenylt…	28	1	148
Journal article	2016	Lundin, Jessica I.; Dills, Russell L.; Ylitalo, Gina M.; Hanson, M. Bradley; Emmons, Candice K.; Schorr, Gregory S.; Ahmad, Jacqui; Hempelmann, Jennifer A.; Parsons, Kim M.; Wasser, Samuel K.	Persistent Organic Pollutant Determination in Killer Whale Scat Samples: Optimization of a Gas Chromatography/Mass Spectrometry Method and Application to Field Samples	Archives of Environmental Contamination and Toxicology		10.1007/s00244-015-0218-8	http://link.springer.com/10.1007/s00244-015-0218-8	Biologic sample collection in wild cetacean populations is challenging. Most information on toxicant levels is obtained from blubber biopsy samples; however, sample collection is invasive and strictly regulated under permit, thus limiting sample numbers. Methods are needed to monitor toxicant levels that increase temporal and repeat sampling of individuals for population health and recovery model…	70	1	2021-09-19
Journal article	2016	Lundin, Jessica I.; Ylitalo, Gina M.; Booth, Rebecca K.; Anulacion, Bernadita; Hempelmann, Jennifer A.; Parsons, Kim M.; Giles, Deborah A.; Seely, Elizabeth A.; Hanson, M. Bradley; Emmons, Candice K.; Wasser, Samuel K.	Modulation in Persistent Organic Pollutant Concentration and Profile by Prey Availability and Reproductive Status in Southern Resident Killer Whale Scat Samples	Environmental Science & Technology		10.1021/acs.est.6b00825	https://pubs.acs.org/doi/10.1021/acs.est.6b00825	Persistent organic pollutants (POPs), specifically PCBs, PBDEs, and DDTs, in the marine environment are well documented, however accumulation and mobilization patterns at the top of the food-web are poorly understood. This study broadens the understanding of POPs in the endangered Southern Resident killer whale population by addressing modulation by prey availability and reproductive status, alon…	50	12	6506-6516
Journal article	2020	Alava, Juan José	Modeling the Bioaccumulation and Biomagnification Potential of Microplastics in a Cetacean Foodweb of the Northeastern Pacific: A Prospective Tool to Assess the Risk Exposure to Plastic Particles	Frontiers in Marine Science		10.3389/fmars.2020.566101	https://www.frontiersin.org/article/10.3389/fmars.2020.566101/full	Microplastics (MPs) can readily be ingested by marine organisms. Direct ingestion and trophic transfer are likely to be the main pathway for microplastics to bioaccumulate in upper trophic level organisms. Bioaccumulation potential of MPs in marine mammalian foodwebs is scarcely known. To understand whether microplastics bioaccumulate in marine mammals, a bioaccumulation model for MPs was develop…	7		566101
Journal article	2016	Alava, Juan José; Gobas, Frank A.P.C.	Modeling 137Cs bioaccumulation in the salmon–resident killer whale food web of the Northeastern Pacific following the Fukushima Nuclear Accident	Science of The Total Environment		10.1016/j.scitotenv.2015.11.097	https://linkinghub.elsevier.com/retrieve/pii/S0048969715310780	To track the long term bioaccumulation of Cs-137 in marine organisms off the Pacific Northwest coast of Canada, we developed a time dependent bioaccumulation model for Cs-137 in a marine mammalian food web that included fish-eating resident killer whales. The model outcomes show that Cs-137 can be expected to gradually bioaccumulate in the food web over time as demonstrated by the increase of the…	544		56-67
Journal article	2012	Alava, Juan José; Ross, Peter S.; Lachmuth, Cara; Ford, John K. B.; Hickie, Brendan E.; Gobas, Frank A. P. C.	Habitat-Based PCB Environmental Quality Criteria for the Protection of Endangered Killer Whales ( <i>Orcinus orca</i> )	Environmental Science & Technology		10.1021/es303062q	https://pubs.acs.org/doi/10.1021/es303062q	The development of an area-based polychlorinated biphenyl (PCB) food-web bioaccumulation model enabled a critical evaluation of the efficacy of sediment quality criteria and prey tissue residue guidelines in protecting fish-eating resident killer whales of British Columbia and adjacent waters. Model-predicted and observed PCB concentrations in resident killer whales and Chinook salmon were in goo…	46	22	12655-12663
Journal article	2006	Ross, Peter S	Fireproof killer whales ( <i>Orcinus orca</i> ): flame-retardant chemicals and the conservation imperative in the charismatic icon of British Columbia, Canada	Canadian Journal of Fisheries and Aquatic Sciences		10.1139/f05-244	http://www.nrcresearchpress.com/doi/10.1139/f05-244	Long-lived and high trophic level marine mammals are vulnerable to accumulating often very high concentrations of persistent chemicals, including pesticides, industrial by-products, and flame retardants. In the case of killer whales (Orcinus orca), some of the older individuals currently frequenting the coastal waters of British Columbia (BC) were born during the First World War, well before the …	63	1	224-234
Journal article	2009	Krahn, Margaret M.; Bradley Hanson, M.; Schorr, Gregory S.; Emmons, Candice K.; Burrows, Douglas G.; Bolton, Jennie L.; Baird, Robin W.; Ylitalo, Gina M.	Effects of age, sex and reproductive status on persistent organic pollutant concentrations in “Southern Resident” killer whales	Marine Pollution Bulletin		10.1016/j.marpolbul.2009.05.014	https://linkinghub.elsevier.com/retrieve/pii/S0025326X09002173	Abstract: “Southern Resident” killer whales (Orcinus orca) that comprise three fish-eating “pods” (J, K and L) were listed as “endangered” in the US and Canada following a 20% population decline between 1996 and 2001. Blubber biopsy samples from Southern Resident juveniles had statistically higher concentrations of certain persistent organic pollutants than were found for adults. Most Southern Re…	58	10	1522-1529
Presentation	2018	Lundin, J. I.; Ylitalo, G. M.; Giles, D.; Seely, E.; Parsons, K.; Hempelmann, J.; Anulacion, B. F.; Boyd, D.; Wasser, S. K.	The threat of toxic contaminants to Southern Resident killer whales: monitoring POPs and PAHs in scat samples				https://cedar.wwu.edu/ssec/2018ssec/allsessions/39/	The Southern Resident killer whale population (SRKW; Orcinus orca) feed primarily on Chinook salmon, which is currently their primary source of exposure to toxics. We measured lipophilic persistent organic pollutants (POPs: PBDEs, PCBs, and DDTs) in SRKW scat (fecal) samples to quantify variations in toxicant levels by pod, sex, and reproductive class, as well as prey availability. We also measur…								Seattle, WA
Report	2002	Grant, S. C. H.; Ross, P. S.	Southern resident killer whales at risk: toxic chemicals in the British Columbia and Washington environment					Southern resident killer whales (Orcinus orca) have recently been described as “among the most contaminated marine mammals in the world”, with levels of polychlorinated biphenyls (PCBs) exceeding those found in the St. Lawrence Beluga whales (Delphinapterus leucas). Killer whales are exposed to a myriad of anthropogenic contaminants, but those of particular concern include the Persistent Organic …			123				Department of Fisheries and Oceans Canada	Sidney, British Columbia
Journal article	2018	Lundin, Jessica I.; Ylitalo, Gina M.; Giles, Deborah A.; Seely, Elizabeth A.; Anulacion, Bernadita F.; Boyd, Daryle T.; Hempelmann, Jennifer A.; Parsons, Kim M.; Booth, Rebecca K.; Wasser, Samuel K.	Pre-oil spill baseline profiling for contaminants in Southern Resident killer whale fecal samples indicates possible exposure to vessel exhaust	Marine Pollution Bulletin		10.1016/j.marpolbul.2018.09.015	https://linkinghub.elsevier.com/retrieve/pii/S0025326X18306544	The Southern Resident killer whale population (Orcinus orca) was listed as endangered in 2005 and shows little sign of recovery. Exposure to contaminants and risk of an oil spill are identified threats. Previous studies on contaminants have largely focused on legacy pollutants. Here we measure polycyclic aromatic hydrocarbons (PAHs) in whale fecal (scat) samples. PAHs are a diverse group of hazar…	136		448-453
Report	2010	Lachmuth, C. L.; Alava, J. J.; Hickie, B. E.; Johannessen, S. C.; Macdonald, R. W.; Ford, J. K. B.; Ellis, G. M.; Gobas, F. A. P. C.; Ross, P. S.	Ocean disposal in resident killer whale(Orcinus orca) critical habitat: science in support of risk management				https://www.dfo-mpo.gc.ca/csas-sccs/Publications/ResDocs-DocRech/2010/2010_116-eng.html	Resident killer whales in the coastal waters of British Columbia and Washington are heavily contaminated with persistent organic pollutants (POPs), including polychlorinated biphenyls (PCBs). The northern and southern populations of resident killer whales are listed, respectively, as threatened and endangered under the Canadian Species at Risk Act (SARA), which protects species at risk from being…							DFO, Ottawa, ON(Canada)
Journal article	2011	Lachmuth, Cara L.; Barrett-Lennard, Lance G.; Steyn, D.Q.; Milsom, William K.	Estimation of southern resident killer whale exposure to exhaust emissions from whale-watching vessels and potential adverse health effects and toxicity thresholds	Marine Pollution Bulletin		10.1016/j.marpolbul.2011.01.002	https://linkinghub.elsevier.com/retrieve/pii/S0025326X11000038	Southern resident killer whales in British Columbia and Washington are exposed to heavy vessel traffic. This study investigates their exposure to exhaust gases from whale-watching vessels by using a simple dispersion model incorporating data on whale and vessel behavior, atmospheric conditions, and output of airborne pollutants from the whale-watching fleet based on emissions data from regulatory…	62	4	792-805
Presentation	2018	Seifert, R.; La Rusic, A.	Managing disposal at sea in the Salish Sea to protect Southern Resident killer whale habitat				https://cedar.wwu.edu/ssec/2018ssec/allsessions/103/	The Southern Resident Killer Whale (SRKW) population is listed as Endangered under Canada’s Species at Risk Act. As part of its Ocean Protection Plan, Canada is taking action to protect SRKW and their defined Critical Habitat in the Salish Sea. Identified threats to SRKW include noise from vessels, availability of prey, and contaminants. Through the Canadian Environmental Protection Act (CEPA), E…								Seattle, WA
Thesis	2018	Pearce, R.	Bioaccumulation of PCBs in Southern Resident Killer Whales in the Salish Sea				http://rem-main.rem.sfu.ca/theses/PearceRobyn_2018_MRM706.pdf	Chemical contaminants are a threat to Southern Resident Killer Whales (SRKW). The contribution of polychlorinated biphenyls (PCBs) in local sediments to the bioaccumulation of PCBs in SRKW was investigated. The temporal and spatial trends of concentrations of PCBs in sediment, Chinook salmon and SRKW were assessed. The half – lives of PCBs were estimated using a food web bioaccumulation model and…				115			Simon Fraser University	Vancouver, British Columbia
Report	2016	Mongillo, Teresa Mishael; Ylitalo, Gina Maria; Rhodes, Linda D.; O'Neill, Sandra M.; Noren, Dawn Page	Exposure to a mixture of toxic chemicals : implications for the health of endangered southern resident killer whales				https://repository.library.noaa.gov/view/noaa/12818				118				NOAA Northwest Fisheries Science Center	Seattle, WA
Thesis	2015	Lundin, J. I.	Biologic monitoring of environmental contaminants in marine (killer whale) and terrestrial (caribou, moose, and wolf) wildlife populations using scat samples				https://digital.lib.washington.edu/researchworks/bitstream/handle/1773/33598/Lundin_washington_0250E_14456.pdf?sequence=1&isAllowed=y	Wildlife are intimately associated with contaminated waters and polluted landscapes, serving as sentinels to the health of our shared environment. This project optimized trace analytic techniques for measuring toxicants in scat samples and evaluated contamination levels among Southern Resident killer whales (SRKWs; Orcinus orca) in the Salish Sea and Woodland caribou (Rangifer tarandus caribou), …				138			University of Washington	Seattle, WA
Journal article	2012	Mongillo, Tm; Holmes, Ee; Noren, Dp; VanBlaricom, Gr; Punt, Ae; O’Neill, Sm; Ylitalo, Gm; Hanson, Mb; Ross, Ps	Predicted polybrominated diphenyl ether (PBDE) and polychlorinated biphenyl (PCB) accumulation in southern resident killer whales	Marine Ecology Progress Series		10.3354/meps09658	http://www.int-res.com/abstracts/meps/v453/p263-277/	Persistent organic pollutants (POPs) are anthropogenic contaminants that bioaccumulate in upper trophic level species. Polybrominated diphenyl ethers (PBDEs) and polychlorinated biphenyls (PCBs) are POPs of particular concern because they can induce immunotoxicity, neurotoxicity, and reproductive impairment. Killer whales Orcinus orca can accumulate high concentrations of POPs because they are lo…	453		263-277
Southern resident killer whale - Status/Range
Journal article	2016	Wallmo, Kristy; Lew, Daniel K.	A comparison of regional and national values for recovering threatened and endangered marine species in the United States	Journal of Environmental Management		10.1016/j.jenvman.2016.04.053	https://linkinghub.elsevier.com/retrieve/pii/S0301479716302249	It is generally acknowledged that willingness-to-pay (WTP) estimates for environmental goods exhibit some degree of spatial variation. In a policy context, spatial variation in threatened and endangered species values is important to understand, as the beneﬁt stream from policies affecting threatened and endangered species may vary locally, regionally, or among certain population segments. In thi…	179		38-46
Journal article	2018	Johnson, Christopher Michael	Ecotypes and Killer Whales: A Scientific Concept to Guide the Endangered Species Act's Distinct Population Segment	University of Colorado Law Review			https://lawreview-dev.cu.law/wp-content/uploads/2018/06/89.3-Johnson.pdf	The Endangered Species Act protects threatened and endangered species, subspecies, and distinct population segments, with species listings guided by the best scientific information available. “Distinct population segment,” however, is not a biological term. To date, there is still not a test based on evolutionary theory used to determine distinct population segments. This Comment attempts to chan…	89	3	33
Conference paper	2012	Noren, D. P.; Hauser, D. D. W.	Using behavioral data to identify potential marine protected areas for the endangered Southern Resident killer whale													Seattle, WA
Journal article	2017	Rice, A; Deecke, Vb; Ford, Jkb; Pilkington, Jf; Oleson, Em; Hildebrand, Ja; Širović, A	Spatial and temporal occurrence of killer whale ecotypes off the outer coast of Washington State, USA	Marine Ecology Progress Series		10.3354/meps12158	http://www.int-res.com/abstracts/meps/v572/p255-268/	Three killer whale Orcinus orca ecotypes inhabit the northeastern Pacific: residents, transients, and offshores. To investigate intraspecific differences in spatial and temporal occur rence off the outer coast of Washington State, USA, 2 long-term acoustic recorders were deployed from July 2004 to August 2013: one off the continental shelf in Quinault Canyon (QC) and the other on the shelf, off C…	572		255-268
Journal article	2014	Fearnbach, Holly; Durban, John W.; Ellifrit, David K.; Waite, Janice M.; Matkin, Craig O.; Lunsford, Chris R.; Peterson, Megan J.; Barlow, Jay; Wade, Paul R.	Spatial and social connectivity of fish-eating “Resident” killer whales (Orcinus orca) in the northern North Pacific	Marine Biology		10.1007/s00227-013-2351-0	http://link.springer.com/10.1007/s00227-013-2351-0	The productive North Pacific waters of the Gulf of Alaska, Aleutian Islands and Bering Sea support a high density of fish-eating "Resident" type killer whales (Orcinus orca), which overlap in distribution with commercial fisheries, producing both direct and indirect interactions. To provide a spatial context for these interactions, we analyzed a 10-year dataset of 3,058 whale photo-identification…	161	2	459-472
Journal article	2019	Tennessen, Jennifer B.; Holt, Marla M.; Ward, Eric J.; Hanson, M. Bradley; Emmons, Candice K.; Giles, Deborah A.; Hogan, Jeffrey T.	Hidden Markov models reveal temporal patterns and sex differences in killer whale behavior	Scientific Reports		10.1038/s41598-019-50942-2	http://www.nature.com/articles/s41598-019-50942-2	Behavioral data can be important for effective management of endangered marine predators, but can be challenging to obtain. We utilized suction cup-attached biologging tags equipped with stereo hydrophones, triaxial accelerometers, triaxial magnetometers, pressure and temperature sensors, to characterize the subsurface behavior of an endangered population of killer whales ( Orcinus orca) . Tags r…	9	1	14951
Journal article	2018	Baker, C. Scott; Steel, Debbie; Nieukirk, Sharon; Klinck, Holger	Environmental DNA (eDNA) From the Wake of the Whales: Droplet Digital PCR for Detection and Species Identification	Frontiers in Marine Science		10.3389/fmars.2018.00133	http://journal.frontiersin.org/article/10.3389/fmars.2018.00133/full	Genetic sampling for identification of species, subspecies or stock of whales, dolphins and porpoises at sea remains challenging. Most samples have been collected with some form of a biopsy dart requiring a close approach of a vessel while the individual is at the surface. Here we have adopted droplet digital (dd)PCR technology for detection and species identification of cetaceans using environme…	5		133
Journal article	2019	Pawluk, Kylee A.; Fox, Caroline H.; Service, Christina N.; Stredulinsky, Eva H.; Bryan, Heather M.	Raising the bar: Recovery ambition for species at risk in Canada and the US	PLOS ONE		10.1371/journal.pone.0224021	https://dx.plos.org/10.1371/journal.pone.0224021	Routinely crossing international borders and/or persisting in populations across multiple countries, species are commonly subject to a patchwork of endangered species legislation. Canada and the United States share numerous endangered species; their respective acts, the Species at Risk Act (SARA) and the Endangered Species Act (ESA), require documents that outline requirements for species recover…	14	11	e0224021
Journal article	2009	Parsons, K.M.; Balcomb, K.C.; Ford, J.K.B.; Durban, J.W.	The social dynamics of southern resident killer whales and conservation implications for this endangered population	Animal Behaviour		10.1016/j.anbehav.2009.01.018	https://linkinghub.elsevier.com/retrieve/pii/S0003347209000517	Quantitatively characterizing the social structure of a population provides important insight into the forces shaping key population processes. Moreover, long-term social dynamics provide an avenue for understanding population-level responses to changes in socioecological conditions. This is particularly true for species that show natal philopatry and highly stable hierarchically structured socia…	77	4	963-971
Southern resident killer whale - Noise/Communication
Report	2017	Ferrara, G. A.; Mongillo, T. M.; Barre, L. M.	Reducing Disturbance from Vessels to Southern Resident Killer Whales: Assessing the Effectiveness of the 2011 Federal Regulations in Advancing Recovery Goals				https://repository.library.noaa.gov/view/noaa/17432				82
Report	2008	Holt, M. M.	Sound Exposure and Southern Resident Killer Whales (Orcinus orca): A Review of Current Knowledge and Data Gaps				https://repository.library.noaa.gov/view/noaa/3541				59
Journal article	2009	Holt, Marla M.; Noren, Dawn P.; Veirs, Val; Emmons, Candice K.; Veirs, Scott	Speaking up: Killer whales (Orcinus orca) increase their call amplitude in response to vessel noise	The Journal of the Acoustical Society of America		10.1121/1.3040028		This study investigated the effects of anthropogenic sound exposure on the vocal behavior of free-ranging killer whales. Endangered Southern Resident killer whales inhabit areas including the urban coastal waters of Puget Sound near Seattle, WA, where anthropogenic sounds are ubiquitous, particularly those from motorized vessels. A calibrated recording system was used to measure killer whale call…	125	1	EL27-32
Journal article	2015	Houghton, Juliana; Holt, Marla M.; Giles, Deborah A.; Hanson, M. Bradley; Emmons, Candice K.; Hogan, Jeffrey T.; Branch, Trevor A.; VanBlaricom, Glenn R.	The Relationship between Vessel Traffic and Noise Levels Received by Killer Whales (Orcinus orca)	PloS One		10.1371/journal.pone.0140119		Whale watching has become increasingly popular as an ecotourism activity around the globe and is beneficial for environmental education and local economies. Southern Resident killer whales (Orcinus orca) comprise an endangered population that is frequently observed by a large whale watching fleet in the inland waters of Washington state and British Columbia. One of the factors identified as a ris…	10	12	e0140119
Journal article	2009	Noren, Dp; Johnson, Ah; Rehder, D; Larson, A	Close approaches by vessels elicit surface active behaviors by southern resident killer whales	Endangered Species Research		10.3354/esr00205	http://www.int-res.com/abstracts/esr/v8/n3/p179-192/	Vessel disturbance is one potential risk factor to the endangered population of southern resident killer whales Orcinus orca. This study was conducted to determine if southern resident killer whales perform surface active behaviors (SABs) in response to close approaches by vessels. Data were collected in the San Juan Islands, USA, and Gulf Islands, Canada, from May through September 2005 and 2006…	8	3	179-192
Report	2008	Howes, Laura	Masking of High Frequency Echolocation Signals–Does Boat Traffic Interfere With the Ability of Southern Resident Killer Whales to Find Food? A Study of Echolocation Signals and Their Sound Propagation				http://www.beamreach.org/081dir/final-proposal-laura-howes.pdf				12				Beam Reach Marine Science and Sustainability School	Friday Harbor Labs, UW
Report	2011	Moe, Laura J	Variations in S6, S10, and S19 calls in Southern Resident Killer Whales (Orcinus orca)				http://www.beamreach.org/data/112/products/final-paper-laura112.pdf	In killer whales (Orcinus orca), vocal calls appear to be an important aspect of communication. Preferences of prey, travel patterns, and vocal “dialects” are distinguishing features among the different ecotypes of northeast pacific killer whales. Fish eating resident killer whales frequently associate with other whales outside their own pod. A vocally distinct clan may contain up to eight pods. …			23				Beam Reach Marine Science and Sustainability School	Friday Harbor Labs, UW
Report	2011	Chang, Sofia	Characteristics of echolocation clicks in southern resident killer whales (Orcinus orcas)				https://digital.lib.washington.edu/researchworks/bitstream/handle/1773/26632/Chang_2011.pdf?sequence=1&isAllowed=y	Odontocetes rely on echolocation clicks to navigate, forage and communicate. As such, understanding the characters of click shall help understanding whale communication. Southern resident killer whales of the North Pacific Ocean are recorded echolocating at Lime Kiln State Park and characteristics of the echolocation clicks are explored. This study aims to describe the nature of killer whale voca…			16				University of California, Berkeley	Friday Harbor Labs, UW
Presentation	2016	Holt, Marla M; Hanson, Brad; Giles, Deborah; Emmons, Candice; Hogan, Jeffery	Noise impacts on Southern Resident killer whales: a comparison of noise levels before and after US vessel regulations				https://cedar.wwu.edu/ssec/2016ssec/species_food_webs/6/	Disturbance from vessels and noise is one of several threats to the recovery of the Southern Resident killer whale population. In the U.S., vessel regulations were developed to protect these endangered killer whales from vessel and associated noise disturbance, particularly given the extent of whale-watching activities in the Salish Sea. Under the current regulations, most vessels are prohibited …								Vancouver, British Columbia
Presentation	2016	Huey, Richard D; James, Leslie	Shared Waters–Southern Resident Killer Whales and Ferries Crossing the Border				https://cedar.wwu.edu/ssec/2016ssec/species_food_webs/24/	As members of the ECHO group, British Columbia Ferry Services Inc. (BCF) and Washington State Ferries (WSF) are working together on policy development and in-water noise issues relating to the Southern Resident Killer Whales. Policy Development: In 2015, BCF and Washington State Ferries (WSF) worked together to develop a joint policy and Best Management Practices for whale/ferry encounters. The g…								Vancouver, British Columbia
Journal article	2005	Veirs, Val; Veirs, Scott	One year of background underwater sound levels in Haro Strait, Puget Sound	The Journal of the Acoustical Society of America					117	4	2577-2578
Conference paper	2006	Noren, Dawn P	Behavior of Southern Resident killer whales in the presence of vessels in San Juan Islands, Washington								116				Citeseer
Thesis	2018	Cominelli, Simone	A FRAMEWORK TO ESTIMATE THE RISK OF NOISE EXPOSURE FROM VESSELS FOR ENDANGERED CETACEAN SPECIES				https://research.library.mun.ca/13614/1/thesis.pdf	This thesis proposes a framework for assessing and visualizing exposure of the Southern Resident Killer Whale (SRKW) population to vessels’ noise. First, SRKW distribution was mapped and the risk for this population to be exposed to vessel-noise was estimated. The study identified six vessel classes as being the main contributors to noise exposure for SRKW. Building on this result, the second stu…				196			Memorial University of Newfoundland	St. John's Newfoundland
Journal article	2009	Wieland, Monika; Jones, Albyn; Renn, Susan C. P.	Changing durations of southern resident killer whale (Orcinus orca) discrete calls between two periods spanning 28 years	Marine Mammal Science		10.1111/j.1748-7692.2009.00351.x	http://doi.wiley.com/10.1111/j.1748-7692.2009.00351.x	The article offers information on a study which examines the fish-eating Southern Resident population that uses the waters off in the southern end of Vancouver Island. It highlights factors influencing the change in call parameters as was seen for killer whales. Moreover, recordings of J-, K-, and L-Pods that were made from shore via ground-mounted hydrophones are also mentioned. (Copyright appli…	26	1	195-201
Journal article	2002	Erbe, Christine	UNDERWATER NOISE OF WHALE-WATCHING BOATS AND POTENTIAL EFFECTS ON KILLER WHALES (ORCINUS ORCA), BASED ON AN ACOUSTIC IMPACT MODEL	Marine Mammal Science		10.1111/j.1748-7692.2002.tb01045.x	http://doi.wiley.com/10.1111/j.1748-7692.2002.tb01045.x	Underwater noise of whale-watching boats was recorded in the popular killer whale-watching region of southern British Columbia and northwestern Washington State. A software sound propagation and impact assessment model was applied to estimate zones around whale-watching boats where boat noise was audible to killer whales, where it interfered with their communication, where it caused behavioral av…	18	2	394-418
Journal article	2005	Jones, Christopher; Wolfson, Michael	The acoustic environment of the southern resident killer whales in Haro Strait: Propagation modeling and analysis of field measurements	The Journal of the Acoustical Society of America		10.1121/1.4809428	http://asa.scitation.org/doi/10.1121/1.4809428	[unedited] We will discuss the complicated shallow water acoustic environments of the southern resident killer whales in the Haro Strait of the Puget Sound through combined analysis of field measurements and acoustic propagation modeling in the frequency range of one to 20 kHz. Haro Strait is a highly variable acoustic environment with active commercial shipping, whale watching, and Naval activit…	117	4	2526-2526
Journal article	2006	Riesch, Rüdiger; Ford, John K.B.; Thomsen, Frank	Stability and group specificity of stereotyped whistles in resident killer whales, Orcinus orca, off British Columbia	Animal Behaviour		10.1016/j.anbehav.2005.03.026	https://linkinghub.elsevier.com/retrieve/pii/S0003347205003179	Resident killer whales off British Columbia form four acoustically distinct clans, each with a unique dialect of discrete pulsed calls. Three clans belong to the northern and one to the southern community. Resident killer whales also produce tonal whistles, which play an important role in close-range communication within the northern community. However, there has been no comparative analysis of r…	71	1	79-91
Journal article	2016	Veirs, Scott; Veirs, Val; Wood, Jason D.	Ship noise extends to frequencies used for echolocation by endangered killer whales	PeerJ		10.7717/peerj.1657	https://peerj.com/articles/1657	Combining calibrated hydrophone measurements with vessel location data from the Automatic Identification System, we estimate underwater sound pressure levels for 1,582 unique ships that transited the core critical habitat of the endangered Southern Resident killer whales during 28 months between March, 2011, and October, 2013. Median received spectrum levels of noise from 2,809 isolated transits …	4		e1657
Journal article	2014	Williams, Rob; Erbe, Christine; Ashe, Erin; Beerman, Amber; Smith, Jodi	Severity of killer whale behavioral responses to ship noise: A dose–response study	Marine Pollution Bulletin		10.1016/j.marpolbul.2013.12.004	https://linkinghub.elsevier.com/retrieve/pii/S0025326X13007376	Critical habitats of at-risk populations of northeast Pacific "resident" killer whales can be heavily trafficked by large ships, with transits occurring on average once every hour in busy shipping lanes. We modeled behavioral responses of killer whales to ship transits during 35 "natural experiments" as a dose-response function of estimated received noise levels in both broadband and audiogram-we…	79	2021-01-02	254-260
Journal article	2019	Joy, Ruth; Tollit, Dominic; Wood, Jason; MacGillivray, Alexander; Li, Zizheng; Trounce, Krista; Robinson, Orla	Potential Benefits of Vessel Slowdowns on Endangered Southern Resident Killer Whales	Frontiers in Marine Science		10.3389/fmars.2019.00344	https://www.frontiersin.org/article/10.3389/fmars.2019.00344/full	A voluntary commercial vessel slowdown trial was conducted through 16 nm of shipping lanes overlapping critical habitat of at-risk southern resident killer whales (SRKVV) in the Salish Sea. From August 7 to October 6, 2017, the trial requested piloted vessels to slow to 11 knots speed-through-water. Analysis of AIS vessel tracking data showed that 350 of 951 (37%) piloted transits achieved this t…	6		344
Journal article	2019	Bergler, Christian; Schröter, Hendrik; Cheng, Rachael Xi; Barth, Volker; Weber, Michael; Nöth, Elmar; Hofer, Heribert; Maier, Andreas	ORCA-SPOT: An Automatic Killer Whale Sound Detection Toolkit Using Deep Learning	Scientific Reports		10.1038/s41598-019-47335-w	http://www.nature.com/articles/s41598-019-47335-w	Large bioacoustic archives of wild animals are an important source to identify reappearing communication patterns, which can then be related to recurring behavioral patterns to advance the current understanding of intra-specific communication of non-human animals. A main challenge remains that most large-scale bioacoustic archives contain only a small percentage of animal vocalizations and a larg…	9	1	10997
Journal article	2017	Holt, Mm; Hanson, Mb; Giles, Da; Emmons, Ck; Hogan, Jt	Noise levels received by endangered killer whales Orcinus orca before and after implementation of vessel regulations	Endangered Species Research		10.3354/esr00841	http://www.int-res.com/abstracts/esr/v34/p15-26/	Whale watching is often conducted from motorized vessels, which contribute to underwater noise pollution and can disturb marine mammals. Protective measures can ameliorate some effects of disturbance, but it is crucial to empirically assess the effectiveness of such measures, particularly for endangered species. We quantitatively compared noise exposure to endangered southern resident killer whal…	34		15-26
Journal article	2018	Cominelli, Simone; Devillers, Rodolphe; Yurk, Harald; MacGillivray, Alexander; McWhinnie, Lauren; Canessa, Rosaline	Noise exposure from commercial shipping for the southern resident killer whale population	Marine Pollution Bulletin		10.1016/j.marpolbul.2018.08.050	https://linkinghub.elsevier.com/retrieve/pii/S0025326X18306209	This study assesses vessel-noise exposure levels for Southern Resident Killer Whales (SRKW) in the Salish Sea. Kernel Density Estimation (KDE) was used to delineate SRKW summer core areas. Those areas were combined with the output of a regional cumulative noise model describing sound level variations generated by commercial vessels (1/3-octave-bands from 10 Hz to 63.1 kHz). Cumulative distributio…	136		177-200
Journal article	2008	Holt, Marla M.; Veirs, Val; Veirs, Scott	NOISE EFFECTS ON THE CALL AMPLITUDE OF SOUTHERN RESIDENT KILLER WHALES ( <i>ORCINUS ORCA</i> )	Bioacoustics		10.1080/09524622.2008.9753802	http://www.tandfonline.com/doi/abs/10.1080/09524622.2008.9753802		17	2021-01-03	164-166
Journal article	2007	Weiß, Brigitte M.; Symonds, Helena; Spong, Paul; Ladich, Friedrich	Intra- and intergroup vocal behavior in resident killer whales, <i>Orcinus orca</i>	The Journal of the Acoustical Society of America		10.1121/1.2799907	http://asa.scitation.org/doi/10.1121/1.2799907	Vocal communication within and between groups of individuals has been described extensively in birds and terrestrial mammals, however, little is known about how cetaceans utilize their sounds in their natural environment. Resident killer whales, Orcinus orca, live in highly stable matrilines and exhibit group-specific vocal dialects. Single call types cannot exclusively be associated with particu…	122	6	3710-3716
Journal article	2019	Cominelli, Simone; Leahy, Michael; Devillers, Rodolphe; Hall, G. Brent	Geovisualization tools to inform the management of vessel noise in support of species' conservation	Ocean & Coastal Management		10.1016/j.ocecoaman.2018.11.009	https://linkinghub.elsevier.com/retrieve/pii/S0964569118302643	The growth of global ocean noise recorded over the past decades is increasingly affecting marine species and requires assessment on the part of marine managers. We present a framework for the analysis of species' exposure to noise from shipping. Integrated into a set of geovisualization tools, our approach focuses on exposure hotspot mapping, on the computation of probabilistic levels of exposure…	169		113-128
Journal article	2011	Holt, Marla M.; Noren, Dawn P.; Emmons, Candice K.	Effects of noise levels and call types on the source levels of killer whale calls	The Journal of the Acoustical Society of America		10.1121/1.3641446	http://asa.scitation.org/doi/10.1121/1.3641446	Accurate parameter estimates relevant to the vocal behavior of marine mammals are needed to assess potential effects of anthropogenic sound exposure including how masking noise reduces the active space of sounds used for communication. Information about how these animals modify their vocal behavior in response to noise exposure is also needed for such assessment. Prior studies have reported varia…	130	5	3100-3106
Book section	2012	Holt, Marla M.; Noren, Dawn P.; Emmons, Candice K.	Does Vessel Noise Affect the Use of Sound by Foraging Orcinus orca (Killer Whales)?	The Effects of Noise on Aquatic Life	978-1-4419-7310-8 978-1-4419-7311-5		http://link.springer.com/10.1007/978-1-4419-7311-5_73	Investigations on the behavioral responses of cetaceans to a variety of anthropogenic sounds are numerous, with a large proportion of these studies focused on responses to vessels (Nowacek et al. 2007; Richardson et al. 1995). Behavioral responses that affect activities associated with survival and reproduction are of particular concern because they have clearer repercussions on life functions. F…	730		327-330				Springer New York	New York, NY
Journal article	2000	Deecke, V.B; Ford, J.K.B; Spong, P	Dialect change in resident killer whales: implications for vocal learning and cultural transmission	Animal Behaviour		10.1006/anbe.2000.1454	https://linkinghub.elsevier.com/retrieve/pii/S0003347200914544	Variation in vocal signals among populations and social groups of animals provides opportunities for the study of the mechanisms of behavioural change and their importance in generating and maintaining behavioural variation. We analysed two call types made by two matrilineal social groups of resident killer whales, Orcinus orca, over 12-13 years. We used a neural network-based index of acoustic s…	60	5	629-638
Journal article	2001	Thomsen, F.; Franck, D.; Ford, J. K. B.	Characteristics of whistles from the acoustic repertoire of resident killer whales (Orcinus orca) off Vancouver Island, British Columbia	The Journal of the Acoustical Society of America		10.1121/1.1349537	http://scitation.aip.org/content/asa/journal/jasa/109/3/10.1121/1.1349537	The acoustic repertoire of killer whales (Orcinus or-cn) consists of pulsed calls and tonal sounds, called whistles. Although previous studies gave information on whistle parameters, no study has presented a detailed quantitative characterization of whistles from wild killer whales. Thus an interpretation of possible functions of whistles in killer whale underwater communication has been impossib…	109	3	1240-1246
Journal article	2012	Filatova, Olga A.; Deecke, Volker B.; Ford, John K.B.; Matkin, Craig O.; Barrett-Lennard, Lance G.; Guzeev, Mikhail A.; Burdin, Alexandr M.; Hoyt, Erich	Call diversity in the North Pacific killer whale populations: implications for dialect evolution and population history	Animal Behaviour		10.1016/j.anbehav.2011.12.013	https://linkinghub.elsevier.com/retrieve/pii/S0003347211005537	Although killer whale, Orcinus orca, dialects have been studied in detail in several populations, little attempt has been made to compare dialect characteristics between populations. In this study we investigated geographical variation in monophonic and biphonic calls among four resident populations from the North Pacific Ocean: Northern and Southern residents from British Columbia and Washington…	83	3	595-603
Journal article	2012	Xu, Jinshan; Deng, Z. Daniel; Martinez, Jayson J.; Carlson, Thomas J.; Myers, Joshua R.; Weiland, Mark A.	Broadband Acoustic Environment at a Tidal Energy Site in Puget Sound	Marine Technology Society Journal		10.4031/MTSJ.46.2.1	https://www.ingentaconnect.com/content/10.4031/MTSJ.46.2.1	Abstract Admiralty Inlet, Puget Sound, Washington, has been selected as a potential tidal energy site. It is located near shipping lanes, is possibly a highly variable acoustic environment, and is frequented by the endangered Southern Resident killer whale (SRKW). Resolving environmental impacts is the first step to receiving approval to deploy tidal turbines. Several monitoring technologies are …	46	2	65-73
Journal article	2010	Au, Whitlow W. L.; Horne, John K.; Jones, Christopher	Basis of acoustic discrimination of chinook salmon from other salmons by echolocating Orcinus orca	The Journal of the Acoustical Society of America		10.1121/1.3473697	http://scitation.aip.org/content/asa/journal/jasa/128/4/10.1121/1.3473697	The "resident" ecotype of killer whales (Orcinus orca) in the waters of British Columbia and Washington State have a strong preference for Chinook salmon even in months when Chinook comprise less than about 10% of the salmon population. The foraging behavior of killer whales suggests that they depend on echolocation to detect and recognize their prey. In order to determine possible cues in echoes…	128	4	2225-2232
Journal article	2019	Williams, Rob; Veirs, Scott; Veirs, Val; Ashe, Erin; Mastick, Natalie	Approaches to reduce noise from ships operating in important killer whale habitats	Marine Pollution Bulletin		10.1016/j.marpolbul.2018.05.015	https://linkinghub.elsevier.com/retrieve/pii/S0025326X18303229	Abstract Shipping is key to global trade, but is also a dominant source of anthropogenic noise in the ocean. Chronic noise from ships can affect acoustic quality of important whale habitats. Noise from ships has been identified as one of three main stressors–in addition to contaminants, and lack of Chinook salmon prey–in the recovery of the endangered southern resident killer whale (SRKW) populat…	139		459-469
Journal article	2013	Holt, Marla M.; Noren, Dawn P.; Emmons, Candice K.	An investigation of sound use and behavior in a killer whale ( <i>Orcinus orca</i> ) population to inform passive acoustic monitoring studies	Marine Mammal Science		10.1111/j.1748-7692.2012.00599.x	http://doi.wiley.com/10.1111/j.1748-7692.2012.00599.x		29	2	E193-E202
Journal article	2012	Bassett, Christopher; Polagye, Brian; Holt, Marla; Thomson, Jim	A vessel noise budget for Admiralty Inlet, Puget Sound, Washington (USA)	The Journal of the Acoustical Society of America		10.1121/1.4763548	http://asa.scitation.org/doi/10.1121/1.4763548	One calendar year of Automatic Identification System (AIS) ship-traffic data was paired with hydrophone recordings to assess ambient noise in northern Admiralty Inlet, Puget Sound, WA (USA) and to quantify the contribution of vessel traffic. The study region included inland waters of the Salish Sea within a 20 km radius of the hydrophone deployment site. Spectra and hourly, daily, and monthly amb…	132	6	3706-3719
Journal article	1998	Miller, Patrick J.; Tyack, Peter L.	A small towed beamforming array to identify vocalizing resident killer whales (Orcinus orca) concurrent with focal behavioral observations	Deep Sea Research Part II: Topical Studies in Oceanography		10.1016/S0967-0645(98)00028-9	https://linkinghub.elsevier.com/retrieve/pii/S0967064598000289	Investigations of communication systems benefit from concurrent observation of vocal and visible behaviors of individual animals. A device has been developed to identify individual vocalizing resident killer whales (Orcinus orca) during focal behavioral observations. The device consists of a 2-m, 15-element hydrophone array, which is easily towed behind a small vessel, on-board multi-channel reco…	45	7	1389-1405
Journal article	1989	Ford, John K. B.	Acoustic behaviour of resident killer whales ( <i>Orcinus orca</i> ) off Vancouver Island, British Columbia	Canadian Journal of Zoology		10.1139/z89-105	http://www.nrcresearchpress.com/doi/10.1139/z89-105	Recordings of underwater vocalizations and behavioural observations were collected from 16 photographically identified resident pods of killer whales (Orcinus orca) off Vancouver Island, British Columbia, during 1978–1983. Vocalizations recorded during 43 days spent with three representative pods were analyzed for each of five activity states: foraging, travelling, group-resting, socializing, and…	67	3	727-745
Report	2015	Hanson, M. B.; Ward, E. J.; Emmons, C. K.; Holt, M. M.; Holzer, D. M.	Using satellite-tag locations to improve acoustic detection data for endangered killer whales near a US Navy training range in Washington State					Prepared for: US Navy, US Pacific Fleet, Pearl Harbor, HI. Prepared by: National Oceanic and Atmospheric Administration, Northwest Fisheries Science Center under MIPR							NOAA Fisheries, Northwest Fisheries Science Center	Seattle, WA
Report	2011	Bailey, M.	Variation in Southern Resident Killer Whale (Orcinus orca) Acoustic Signals in Relation to Environmental Factors				http://www.beamreach.org/wp-content/uploads/paper_mandy111.pdf				27				Beam Reach Marine Science and Sustainability School	Friday Harbor Labs, UW
Journal article	2011	Tennessen, Jennifer B.	The relationship between anthropogenic noise and frequency contours of southern resident killer whale (Orcinus orca) stereotyped vocalizations.	The Journal of the Acoustical Society of America		10.1121/1.3588649	http://asa.scitation.org/doi/10.1121/1.3588649	Marine mammals evolved alongside naturally occurring noise in underwater environments, but recent increases in ocean anthropogenic noise present challenges to effective acoustic communication. Several species of marine mammals have demonstrated compensation strategies to avoid masking, including modifying call duration, frequency, rate, or amplitude. This research explored the relationship betwee…	129	4	2607-2607
Journal article	2019	Erbe, Christine; Marley, Sarah A.; Schoeman, Renée P.; Smith, Joshua N.; Trigg, Leah E.; Embling, Clare Beth	The Effects of Ship Noise on Marine Mammals—A Review	Frontiers in Marine Science		10.3389/fmars.2019.00606	https://www.frontiersin.org/article/10.3389/fmars.2019.00606/full		6		606
Journal article	2019	Jones, Nicola	Ocean uproar: saving marine life from a barrage of noise	Nature		10.1038/d41586-019-01098-6	http://www.nature.com/articles/d41586-019-01098-6	Ship engines, underwater blasts, sonar and oil drilling are filling the seas with sound. Researchers are now trying to pin down the damage humanity’s growing acoustic footprint has on ocean life.	568	7751	158-161
Report	2005	Barroso, C.	Southern resident killer whale vocal response to vessel noise				http://www.beamreach.org/051/papers/celia.pdf				7				Beam Reach Marine Science and Sustainability School	Friday Harbor Labs, UW
Report	2006	Griffin, R. M.; Bain, D. E.	Sound Exposure of Southern Resident Killer Whales											Unpublished
Journal article	2019	Holt, Marla M.; Tennessen, Jennifer B.; Hanson, Brad; Emmons, Candice; Giles, Deborah; Hogan, Jeffery; Wright, Brianna M.; Thornton, Sheila	How acoustics informs understanding of foraging behavior and effects of vessels and noise on killer whales	The Journal of the Acoustical Society of America		10.1121/1.5137050	http://asa.scitation.org/doi/10.1121/1.5137050	Foraging in toothed whales and dolphins is fundamentally tied to the use of sound. Resident-type killer whales (Orcinus orca) use echolocation to locate and capture fast-moving salmon and other fish prey. In addition to prey availability, disturbance from vessels and noise is a threat to the endangered Southern Resident killer whale population given considerable levels of commercial shipping, fis…	146	4	2897-2897
Thesis	2011	Crystal, D.; Moseley, K.; Paterson, C.; Ryvola, R.; Wang, S.	Commercial shipping noise impacts on the critical habitat of the southern resident killer whale (Orcinus orca)					Southern resident killer whales (SRKWs), found commonly on the south coast of British Columbia, are an endangered species struggling to maintain its population size. The critical habitat of the SRKW, an area important to the recovery of the species, is also an area traversed by commercial ships on a daily basis. Among other challenges to the whales such as habitat destruction and contamination, n…				34			University of British Columbia	Vancouver, British Columbia
Report	2017	Heise, K.; Barrett-Lennard, L.; Chapman, R.; Dakin, T.; Erbe, C.; Hannay, D. E.; Merchant, N.; Pilkington, J.; Thornton, S.; Tollit, D. J.	Proposed metrics for the management of underwater noise for southern resident killer whales								31			Coastal Ocean Report Series
Journal article	2020	Jensen, Rylee; Young, Julie K; Otis, Robert E	AGE, SEX CLASS, AND PREY ABUNDANCE INFLUENCE THE FREQUENCY AND TYPE OF PERCUSSIVE BEHAVIOR IN THE SOUTHERN RESIDENT KILLER WHALE (ORCINUS ORCA) POPULATION AT LIME KILN POINT STATE PARK	Northwestern Naturalist		10.1898/1051-1733-101.2.65	https://bioone.org/journals/northwestern-naturalist/volume-101/issue-2/1051-1733-101.2.65/AGE-SEX-CLASS-AND-PREY-ABUNDANCE-INFLUENCE-THE-FREQUENCY-AND/10.1898/1051-1733-101.2.65.full	The endangered Southern Resident Killer Whale (Orcinus orca, SRKW) is an iconic species in the Pacific Northwest. Although many ecological aspects of this population have been studied, why SRKW perform above-surface “percussive” behavior such as breaching, cartwheeling, pectoral-fin slapping, tail lobbing, and dorsal-fin slapping remains unclear. In the present study, we observed SRKW in Haro Str…	101	2	65
Thesis	2012	Fouda, L.	Noisy Neighbours: Using Automatic Identification System (AIS) and Passive Acoustic Monitoring Data to Measure Individual Vessel Source Levels in Critical Whale Habitat				https://www.iccs.org.uk/wp-content/thesis/consci/2012/Fouda.pdf	Anthropogenic ocean noise has increased substantially over the last fifty years and is a significant component of marine pollution. A prominent and increasing noise pollutant in the ocean is that from shipping traffic. The contribution of vessel noise to the ocean noise budget is of concern because the majority of marine species use sound in the ocean to understand and exploit their surroundings.…				72			Imperial College	London, United Kingdom
document	2015	Guan, S.; Wieting, D.	Issuance of an incidental harassment authorization for Vashon seismic retrofit project, Vashon, Washington: environmental assessment
Book section	2013	Tyack, P. L.; Janik, V. M.	Effects of noise on acoustic signal production in marine mammals	Animal communication and noise							251-271				Springer	Heidelberg, Germany
Journal article	2021	Chou, Emily; Southall, Brandon L.; Robards, Martin; Rosenbaum, Howard C.	International policy, recommendations, actions and mitigation efforts of anthropogenic underwater noise	Ocean & Coastal Management		10.1016/j.ocecoaman.2020.105427	https://linkinghub.elsevier.com/retrieve/pii/S0964569120303343	Anthropogenic underwater noise levels have generally increased as industrial activities in the ocean have become more prevalent. Because of the central nature of sound in the lives of many marine animals, and the known and potential adverse impacts of noise, it is also gaining increased international recognition as an important global conservation issue. Here, a current compilation and synthesis …	202		105427
Conference paper	2019	Trounce, Krista; Robinson, Orla; MacGillivray, Alex; Hannay, David; Wood, Jason; Tollit, Dominic; Joy, Ruth	The effects of vessel slowdowns on foraging habitat of the southern resident killer whales			10.1121/2.0001230	http://asa.scitation.org/doi/abs/10.1121/2.0001230	The Enhancing Cetacean Habitat and Observation (ECHO) Program, a collaborative program led by Vancouver Fraser Port Authority, coordinated voluntary slowdowns for commercial shipping traffic in Haro Strait in the summers of 2017 and 2018, to better understand the relationship between vessel speed and source level, and how this may effect noise levels and foraging of the southern resident killer w…			70009				Acoustical Society of America	Bruges, Belgium
Report	2018	Hanson, M. B.; Ward, E. J.; Emmons, C. K.; Holt, M. M.	Modeling the occurrence of endangered killer whales near a US Navy Training Range in Washington State using satellite‐tag locations to improve acoustic detection data				https://www.navymarinespeciesmonitoring.us/files/9315/3186/7492/Hanson_et_al_2018_Modeling_Occurrence_of_SRKW_in_NWTRC.pdf				33				NOAA Fisheries, Northwest Fisheries Science Center	Seattle, WA
Report	2007	Chapman, E. L.	Masking avoidance by Southern Resident Killer Whales in response to anthropogenic sound.				http://www.beamreach.org/071dir/papers/final-paper-elise071.pdf				16				Beam Reach Marine Science and Sustainability School	Friday Harbor Labs, UW
Journal article	2011	Veirs, Scott R.; Veirs, Val R.	Masking of southern resident killer whale signals by commercial ship noise.	The Journal of the Acoustical Society of America		10.1121/1.3588646	http://asa.scitation.org/doi/10.1121/1.3588646	The endangered southern resident killer whales (SRKWs) emit sound to communicate with each other and to hunt fish. Communication or fishing are possible only within a distance (R) at which a signal can be detected. We determine detection distance by comparing the power spectra of the ambient noise and the received signal, with attention to the auditory response curve of the receiver. In Haro Stra…	129	4	2606-2606
Journal article	2018	MacGillivray, Alexander O.; Li, Zizheng	Reductions in underwater radiated noise from shipping during the 2017 Haro Strait vessel slowdown trial	The Journal of the Acoustical Society of America		10.1121/1.5067678	http://asa.scitation.org/doi/10.1121/1.5067678	During 2017, the Vancouver Fraser Port Authority's Enhancing Cetacean Habitat and Observation (ECHO) program carried out a voluntary slowdown trial in Haro Strait (British Columbia) to investigate whether limiting vessel speeds to 11 knots would decrease noise in Southern Resident Killer Whale habitat. During the trial, JASCO collected source levels measurements on two underwater listening statio…	144	3	1731-1731
Thesis	2020	Andress, A.	Drowned Out: How Marine Vessel Noise Impacts the Southern Resident Killer Whale Population in the Salish Sea				http://hdl.handle.net/1974/27793	The endangered Southern Resident killer whale (SRKW) population that consists of a total of 73 members, concentrates in the Salish Sea off the coast of British Columbia, Canada and Washington, USA during the summer. The Salish Sea is also an area of high human occupancy and activity, resulting in high amounts of marine vessel traffic. The noise created by vessel traffic can negatively affect SRKW…				51			Queen's University	Kingston, Ontario, Canada
Report	2007	Hunt, T.	Investigating high frequency underwater vessel noise and potential masking of killer whale echolocation clicks				http://beamreach.org/071				26				Beam Reach Marine Science and Sustainability School
Journal article	2018	Vagle, Svein; O'Neill, Caitlin; Thornton, Sheila; Yurk, Harald	Soundscape characteristics in Southern Resident Killer Whale critical habitats	The Journal of the Acoustical Society of America		10.1121/1.5068130	http://asa.scitation.org/doi/10.1121/1.5068130	The Southern Resident Killer whales (Orcinus orca) (SRKW) are an endangered group of orcas with current range of Pacific North East from California to Northern British Columbia and spend most of the summer months in and around the Salish Sea. This group of mammals feed primarily on fish, are very local, and live in tight-knit family units called pods. July 1 2017 census reported 77 animals; which…	144	3	1846-1846
Thesis	2017	Székely, D.	Constant ocean noise and cetaceans with high site fidelity				https://fse.studenttheses.ub.rug.nl/16218/1/essay_final_version.pdf	Anthropogenic noise in the oceans has increased in the last few decades as maritime transportation, offshore construction and naval activities have increased. The main underwater anthropogenic noise sources are from shipping, military sonar activities and seismic surveys. Since renewable energies are a developing energy source for many countries with sea, the noise provided by offshore windfarm c…				32			University of Groningen	Groningen Netherlands
Presentation	2016	Joy, R.; Wood, J.; Miller, B.; MacGillivray, A.; Meier, S.; Tollit, D. J.	Development of a Simulation Model for Estimating Behavioural Responses to Vessel Noise: A Case Study with the Southern Resident killer whale.				https://cedar.wwu.edu/ssec/2016ssec/species_food_webs/52/	In the marine environment, underwater noise is introduced through a diverse set of industrial activities, including vessel traffic. Endangered Southern Resident killer whales (SRKW), as well as their critical habitat, are federally protected in Canada by the Species at Risk Act. Fisheries and Oceans Canada states in the SRKW recovery strategy that this population of killer whales is potentially v…								Vancouver, British Columbia
Report	2010	NMFS, NOAA	Final environmental assessment for new regulations to protect killer whales from vessel effects in inland waters of Washington				https://media.fisheries.noaa.gov/dam-migration/vessel-rule-ea.pdf				224				NOAA Fisheries, National Marine Fisheries Service, Seattle, WA
Journal article	2010	Wood, J. D.	Marine mammal species conservation: a review of developments in the uses of acoustics	Journal of International Wildlife Law & Policy					13	4	311-325
Report	2015	Clark, C. W.	Potential Acoustic Impacts of Vessel Traffic from the Trans Mountain Expansion Project on Southern Resident Killer Whales				http://www.raincoast.org/wp-content/uploads/2015/05/RCF-SRKW-Acoustics-NEB-Clark-May-2015.pdf	This report is prepared in the context of the National Energy Board of Canada’s review of the proposed Trans Mountain Expansion Project (the “Project”). The Project will carry diluted bitumen from the Alberta tar sands via a pipeline travelling from Edmonton, Alberta to the Westridge Marine Terminal in Burnaby, B.C. From there the oil will be transported by approximately 34 Aframax tankers per mo…							Report prepared for the Raincoast Conservation Foundation
Thesis	2021	McIntyre, D.	Predicting cavitation-induced noise from marine propellers				http://hdl.handle.net/1828/12552	Noise pollution threatens marine ecosystems, where animals rely heavily on sound for navigation and communication. The largest source of underwater noise from human activity is shipping, and propeller-induced cavitation is the dominant source of noise from ships. Mitigation strategies require accurate methods for predicting cavitation-induced noise, which remains challenging. The present thesis e…				135			University of Victoria	Victoria, British Columbia
Thesis	2010	Bassett, C.	Underwater ambient noise at a proposed tidal energy site in Puget Sound				http://depts.washington.edu/pmec/docs/20100528_BassettC_thesis_UnderwaterNoise.pdf	Ambient underwater acoustics data are presented for one-year at a potential tidal energy site in Admiralty Inlet, Washington, USA with maximum currents exceeding 3 m/s. The site, at a depth of approximately 60 meters, is located near shipping lanes, a local ferry route, and a transit area for many cetacean species. A key finding is that non-propagating turbulent pressure fluctuations, termed pseu…				73			University of Washington	Seattle, WA
Report	2019	Matthews, M.-N.; Alavizadeh, Z.; O'Reilly, J.; Fyfe, A.	Assessment of Vessel Noise within the Southern Resident Killer Whale Critical Habitat				https://trid.trb.org/view/1572483	The International Maritime Organization’s Marine Environment Protection Committee recognizes that underwater noise from commercial ships may have short- and long-term impacts on marine mammals. This study assesses the effectiveness of mitigation strategies designed to reduce exposures of marine fauna to vessel noise in the southern Salish Sea. The main shipping routes pass through critical habita…			12				Transportation Research Board 98th Annual Meeting
Thesis	2020	Fouache, A.	Killing with Kindness: is whale watching in the Salish Sea killing the Southern Resident Killer Whales?				https://stud.epsilon.slu.se/16181/1/fouache_a_200929.pdf	The fish-eating Southern Resident Killer Whales (SRKW) live in the Salish Sea and have been listed as endangered by the U.S and Canada in early 2000s. Their population is still declining with only 72 individuals left in May 2020. Reasons for their endangerment go from toxins in the water to underwater disturbance and lack of prey, although the latter is favourited by scientists. The whale watch i…				63			Swedish University of Agricultural Sciences	Uppsala, Sweden
Report	2010	Liang, H.	Unraveling the Communicative Properties of Surface Active Behaviors in Southern Resident killer whales								19				Beam Reach Marine Science and Sustainability School	Friday Harbor Labs, UW
Journal article	2019	Merchant, Nathan D.	Underwater noise abatement: Economic factors and policy options	Environmental Science & Policy		10.1016/j.envsci.2018.11.014	https://linkinghub.elsevier.com/retrieve/pii/S1462901118310748	Underwater noise pollution is becoming globally recognised as a significant threat to aquatic ecosystems and the resources they provide. The effects of noise pollution extend from blue whales to zooplankton, impacting threatened species and affecting key industries including fisheries and ecotourism. In response, policymakers in some jurisdictions have made substantive high-level commitments to a…	92		116-123
Report	2007	Levinson, S. D.	Identifying Individual Variation in the Vocalizations of the Killer Whale, Orcinus orca				http://www.beamreach.org/071dir/props/finprop_sam.pdf				10				Beam Reach Marine Science and Sustainability School
Southern resident killer whale - Population Status/Trajectory
Journal article	2015	Vélez-Espino, L. Antonio; Ford, John K.B.; Araujo, H. Andres; Ellis, Graeme; Parken, Charles K.; Sharma, Rishi	Relative importance of chinook salmon abundance on resident killer whale population growth and viability: Killer whale-chinook salmon interactions	Aquatic Conservation: Marine and Freshwater Ecosystems		10.1002/aqc.2494	http://doi.wiley.com/10.1002/aqc.2494	1. Two distinct populations of resident killer whales (Orcinus orca) in the north-eastern Pacific Ocean have been listed in Canada and the USA as being of conservation concern. One of the major threats recognized for these two populations is nutritional stress associated with prey abundance levels and availability. 2. The predominance of chinook salmon (Oncorhynchus tshawytscha) in the summer die…	25	6	756-780
Journal article	2017	Wasser, Samuel K.; Lundin, Jessica I.; Ayres, Katherine; Seely, Elizabeth; Giles, Deborah; Balcomb, Kenneth; Hempelmann, Jennifer; Parsons, Kim; Booth, Rebecca	Population growth is limited by nutritional impacts on pregnancy success in endangered Southern Resident killer whales (Orcinus orca)	PLOS ONE		10.1371/journal.pone.0179824	https://dx.plos.org/10.1371/journal.pone.0179824		12	6	e0179824
Report	2019	Murray, C C; Hannah, L C; Doniol-Valcroze, T; Wright, B; Stredulinsky, E; Locke, A; , R Lacy	Cumulative Effects Assessment for Northern and Southern Resident Killer Whale Populations in the Northeast Pacific				https://www.dfo-mpo.gc.ca/csas-sccs/Publications/SAR-AS/2019/2019_030-eng.html	The Northern and Southern Resident Killer Whale populations (NRKW and SRKW) that inhabit the waters of the Canadian Pacific coast are listed as Threatened (NRKW) and Endangered (SRKW) under the Species at Risk Act (SARA). The SARA recovery plan developed for these populations identified the assessment of the cumulative effects of anthropogenic threats impacting these populations as a high priorit…			98				Fisheries and Oceans Canada, Science	Ottawa
Report	2015	Lacy, Robert C; Balcomb, K. C.; Brent, L. J. N.; Croft, D. P.; Clark, C. W.; Paquet, P. C.	Report on Population Viability Analysis model investigations of threats to the Southern Resident Killer Whale population from Trans Mountain Expansion Project				http://www.raincoast.org/wp-content/uploads/2015/05/RCF-SRKW-PVA-for-NEB-May-2015.pdf				46				National Energy Board	Raincoast Conservation Foundation
Journal article	2019	Hooper, Rebecca; Brealey, Jaelle C.; Valk, Tom; Alberdi, Antton; Durban, John W.; Fearnbach, Holly; Robertson, Kelly M.; Baird, Robin W.; Bradley Hanson, M.; Wade, Paul; Gilbert, M. Thomas P.; Morin, Phillip A.; Wolf, Jochen B. W.; Foote, Andrew D.; Guschanski, Katerina	Host‐derived population genomics data provides insights into bacterial and diatom composition of the killer whale skin	Molecular Ecology		10.1111/mec.14860	https://onlinelibrary.wiley.com/doi/abs/10.1111/mec.14860	Recent exploration into the interactions and relationship between hosts and their microbiota has revealed a connection between many aspects of the host's biology, health and associated micro-organisms. Whereas amplicon sequencing has traditionally been used to characterize the microbiome, the increasing number of published population genomics data sets offers an underexploited opportunity to stud…	28	2	484-502
Thesis	2010	Fearnbach, H.	INDIVIDUAL-BASED POPULATION ASSESSMENT FOR CETACEANS: USING PHOTOGRAPHS TO INFER ABUNDANCE, DEMOGRAPHY AND INDIVIDUAL QUALITY				https://www.abdn.ac.uk/lighthouse/documents/Fearnbach_PhD_Thesis_Final.pdf	Population assessments are required to inform management and conservation of wildlife. These require estimates of abundance and trends, but analysis of demographics is also key to understanding the drivers of population dynamics. However, there are great challenges when studying cetaceans in their marine environment, which can constrain our ability to fully evaluate abundance and demographics, or…				274			University of Aberdeen	Aberdeen, Scotland
Report	2002	Bain, D. E.	A MODEL LINKING ENERGETIC EFFECTS OF WHALE WATCHING TO KILLER WHALE (ORCINUS ORCA) POPULATION DYNAMICS				http://www.orcarelief.org/docs/bain_paper.pdf				24			Orca Relief Citizens Alliance	University of Washington	Friday Harbor Labs, UW
Journal article	2010	Pilot, M.; Dahlheim, M. E.; Hoelzel, A. R.	Social cohesion among kin, gene flow without dispersal and the evolution of population genetic structure in the killer whale ( <i>Orcinus orca</i> )	Journal of Evolutionary Biology		10.1111/j.1420-9101.2009.01887.x	http://doi.wiley.com/10.1111/j.1420-9101.2009.01887.x	In social species, breeding system and gregarious behavior are key factors influencing the evolution of large-scale population genetic structure. The killer whale is a highly social apex predator showing genetic differentiation in sympatry between populations of foraging specialists (ecotypes), and low levels of genetic diversity overall. Our comparative assessments of kinship, parentage and disp…	23	1	20-31
Journal article	2018	Olson, Jk; Wood, J; Osborne, Rw; Barrett-Lennard, L; Larson, S	Sightings of southern resident killer whales in the Salish Sea 1976-2014: the importance of a long-term opportunistic dataset	Endangered Species Research		10.3354/esr00918	https://www.int-res.com/abstracts/esr/v37/p105-118/	Southern resident killer whales (SRKWs) Orcinus orca may be present year round in the Salish Sea, i.e. the inland waterways of Washington State (USA) and southern British Columbia (Canada). SRKWs were listed as endangered in 2005 under the US Endangered Species Act. The Whale Museum (Washington, USA) has been collecting opportunistic sightings reports on SRKWs since 1976 with a goal of providing …	37		105-118
[truncated: 107 more rows]
