# Supplementary material for: A Systematic Review Demonstrates How Surrogate Populations Help Inform Conservation and Management of an Endangered Species—The Case of Cook Inlet, Alaska Belugas
Source: Frontiers journal article supplement (doi:10.3389/fmars.2022.804218), 2022-03-03
Supplement: Table_2.xlsx [file Table_2.xlsx]

## Sheet: Sheet1
Supplementary Table 2. Number of records resulting from systematic literature search by cetacean population, search terms, and year, 1975-May 2021, for Cook Inlet beluga, St. Lawrence beluga, Hector's dolphins, and southern resident killer whales.
Population	1975	1976	1977	1978	1979	1980	1981	1982	1983	1984	1985	1986	1987	1988	1989	1990	1991	1992	1993	1994	1995	1996	1997	1998	1999	2000	2001	2002	2003	2004	2005	2006	2007	2008	2009	2010	2011	2012	2013	2014	2015	2016	2017	2018	2019	2020	2021	Total
Cook Inlet beluga
Climate change/anthropogenic					1																1	2	1			1			1		1			1	1		2		1			1	1			1	1	17
Management					1															2	1				1	8	1	1			1	1	3	3	2	6	8	4	4	2	5	3	2	1		2		62
Pollution																									1	1	1			1						1	1	1	1									8
Status/range																																1	1			1						1		2				6
Noise/communication																					1								1				2	1	2	3	2	3	3	2	1	4	2		2	2		31
Population status/trajectory																						1			2	5	1	1	2	1	2	3	1	1	2	1	1	3	2	1	4	4	2		2	8		50
Reduced prey																													1						1	1	2			2	1			1				9
Stress/disease																																			1		1		1	1				2	1	3		10
																																																193
St. Lawrence beluga
Climate change/anthropogenic																				1																1	2			2			1	2		1		10
Management														1		1	2		1								1	1					1			1		3		2	1		1		1	1		18
Pollution												1	1	1					2	2	1	2	2	1	1	4	2	2	2	1		2	1	1			2	2		2		1	1	1	2	1	2	43
Status/range	1																							2																			1					4
Noise/communication																									1				1	2	2	1				1		1		2		1	1	1		2		16
Population status/trajectory										1	1						1		1					2	1		4	1												4	2							18
Reduced prey																					1													1						2			1			1		6
Stress/disease											1			1			1		3	3	3			1	4	2	2	3	5			1					1		1	2	2	1		2	1			40
																																																155
Hector's dolphin
Climate change/anthropogenic																							1			2	1			1	3		1	1	2	2			1				1		1	1		18
Management																	1	1	1		1			1	2	1		1	3	2		1	1	2	2	2	3	3	2	4	1	1			7	2		45
Pollution																1						1														1								1		1		5
Status/range																			1		1						1	2		1				2			2	2	1	2		1	1	1	1	2		21
Noise/communication																1									1	1				1				1		3			1			2	1	2	1			15
Population status/trajectory																1	1	1						1	1		3	1	1		2				1	1			1	1		2	2	1	1	2		24
Reduced prey																	2						1			2		1		2	1		1	1	1			1	1		1	1	1		2			19
Stress/disease												1																							1				1		1		1		1	1		7
																																																154
Southern resident killer whale
Climate change/anthropogenic		1																										1				4			2			3	2	3		3	2	1	4	1	2	29
Management																									1			1		2		1	2	1	4	2	2		3	3		3	3	3	4	1	1	37
Pollution																												1	1			2	2		2	1	1	2			1	4		6	1	2		26
Status/range																											1								1			1		1		1	1	2	2			10
Noise/communication															1									1		1	1	1			3	3	4	3	3	5	7	5	2	1	4	4	4	5	10	3	2	73
Population status/trajectory																								1	1	1		1		1			1	1	1	3	2			1	4	1	2	3	3		1	28
Reduced prey																			1					1	1		1		1		2	2	2	1	4	4	4	5	1	3	2	7	4	5	12	4	2	69
Stress/disease																														1	1	1	1						2		1		1		4	3		15
																																																287
Totals	1	1	0	0	2	0	0	0	0	1	2	2	1	3	1	4	8	2	10	8	10	6	5	11	18	29	20	19	19	16	18	23	24	21	33	40	43	39	31	43	31	46	37	42	63	45	11	789
